# Supplementary material
Source: PubMed Central journal article supplement (PMC5518668)

## **Profiling the Reactivity of Cyclic C-Nucleophiles towards Electrophilic Sulfur in Cysteine Sulfenic Acid**

Vinayak Gupta and Kate S. Carroll\*

Department of Chemistry, The Scripps Research Institute, Jupiter, Florida, 33458

**<sup>1</sup>H-NMR and <sup>13</sup>C-NMR Data**

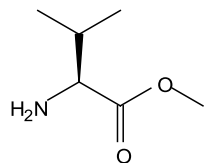

1H-NMR in CDCl3, 400 MHz

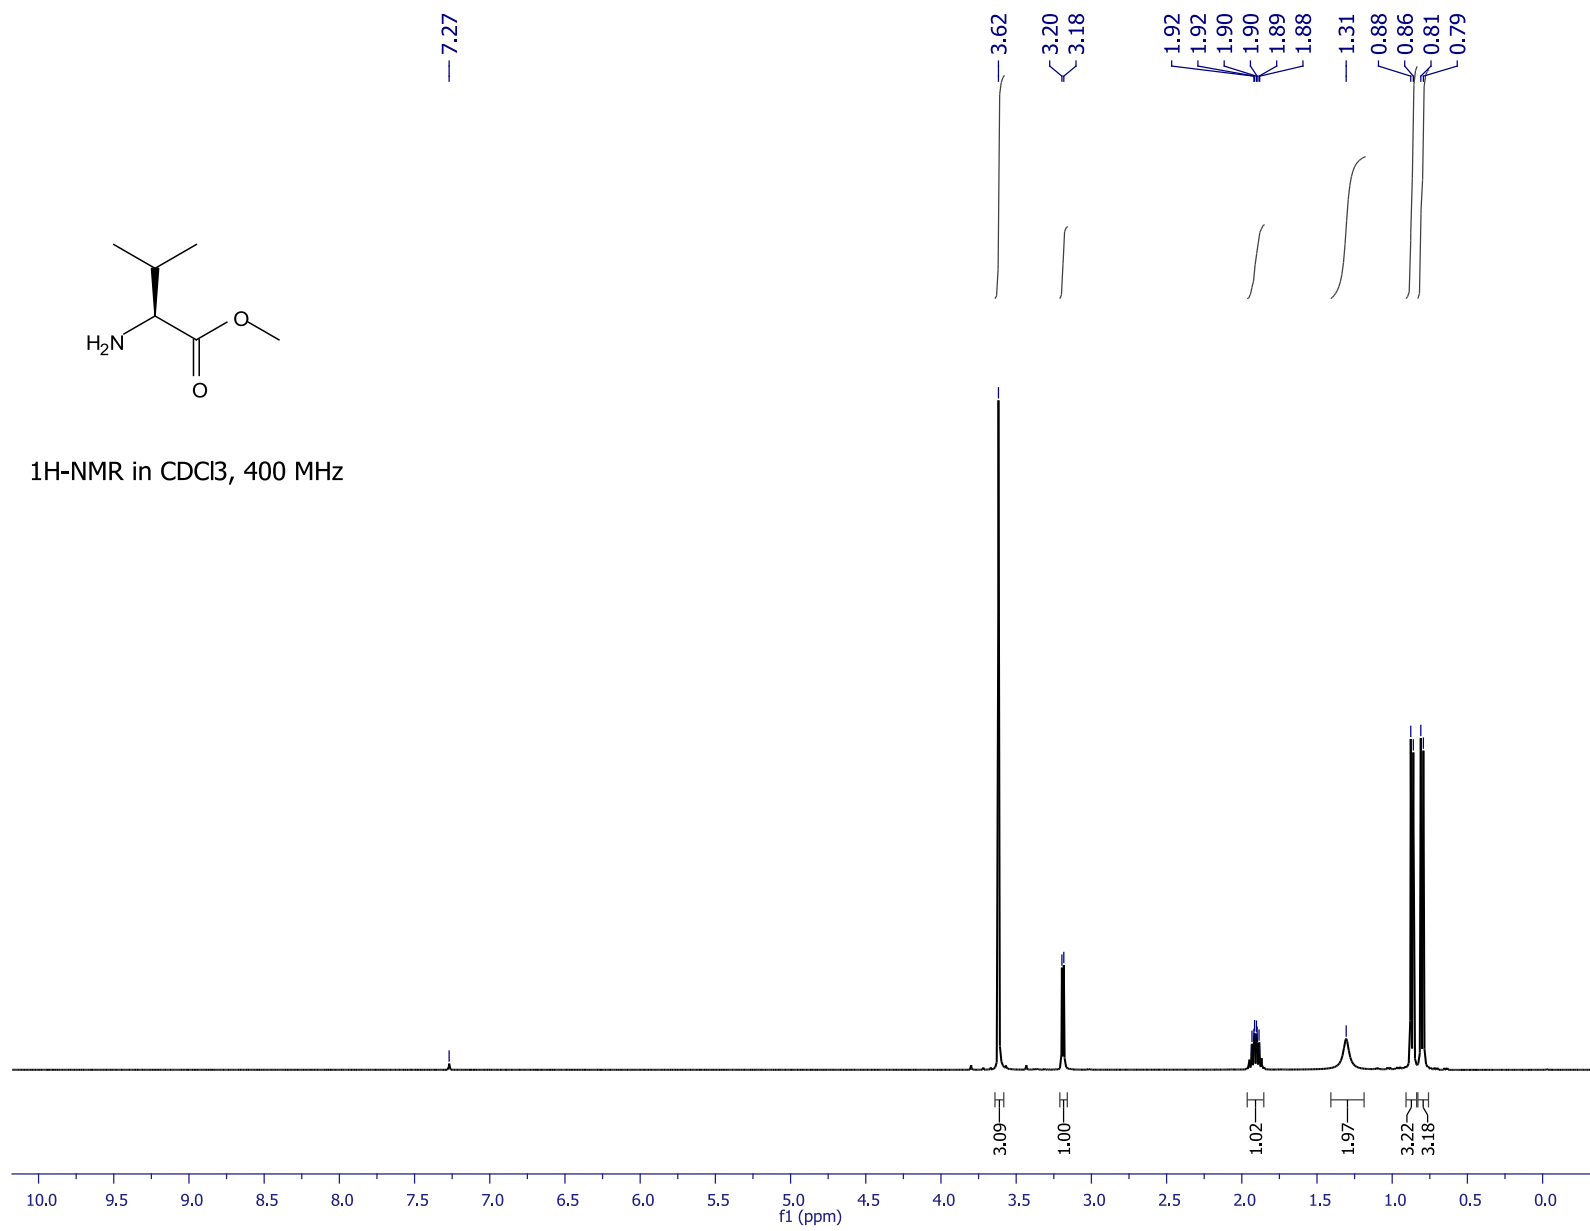

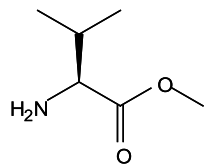

<sup>13</sup>C-NMR in CDCl<sub>3</sub>, 100 MHz

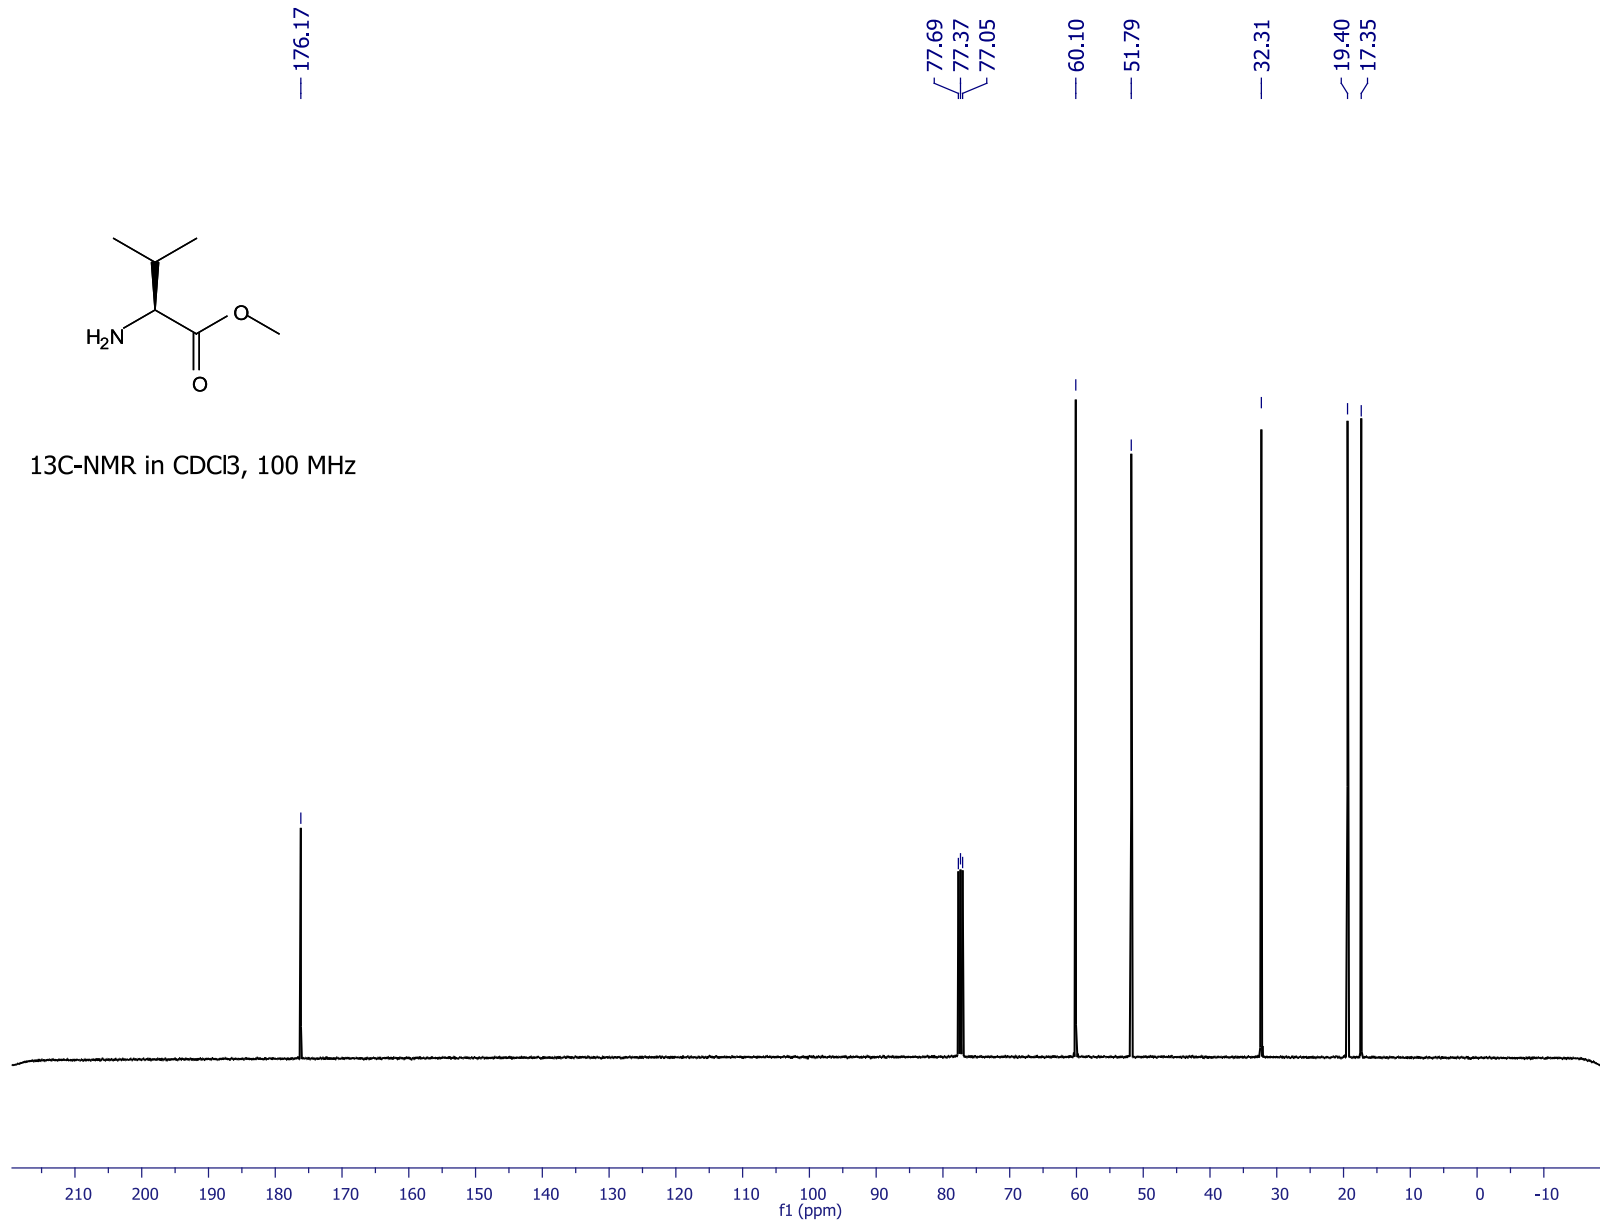

(Cbz-Cys-OH)<sup>2</sup>  
1H-NMR in DMSO-d<sub>6</sub>, 400 MHz

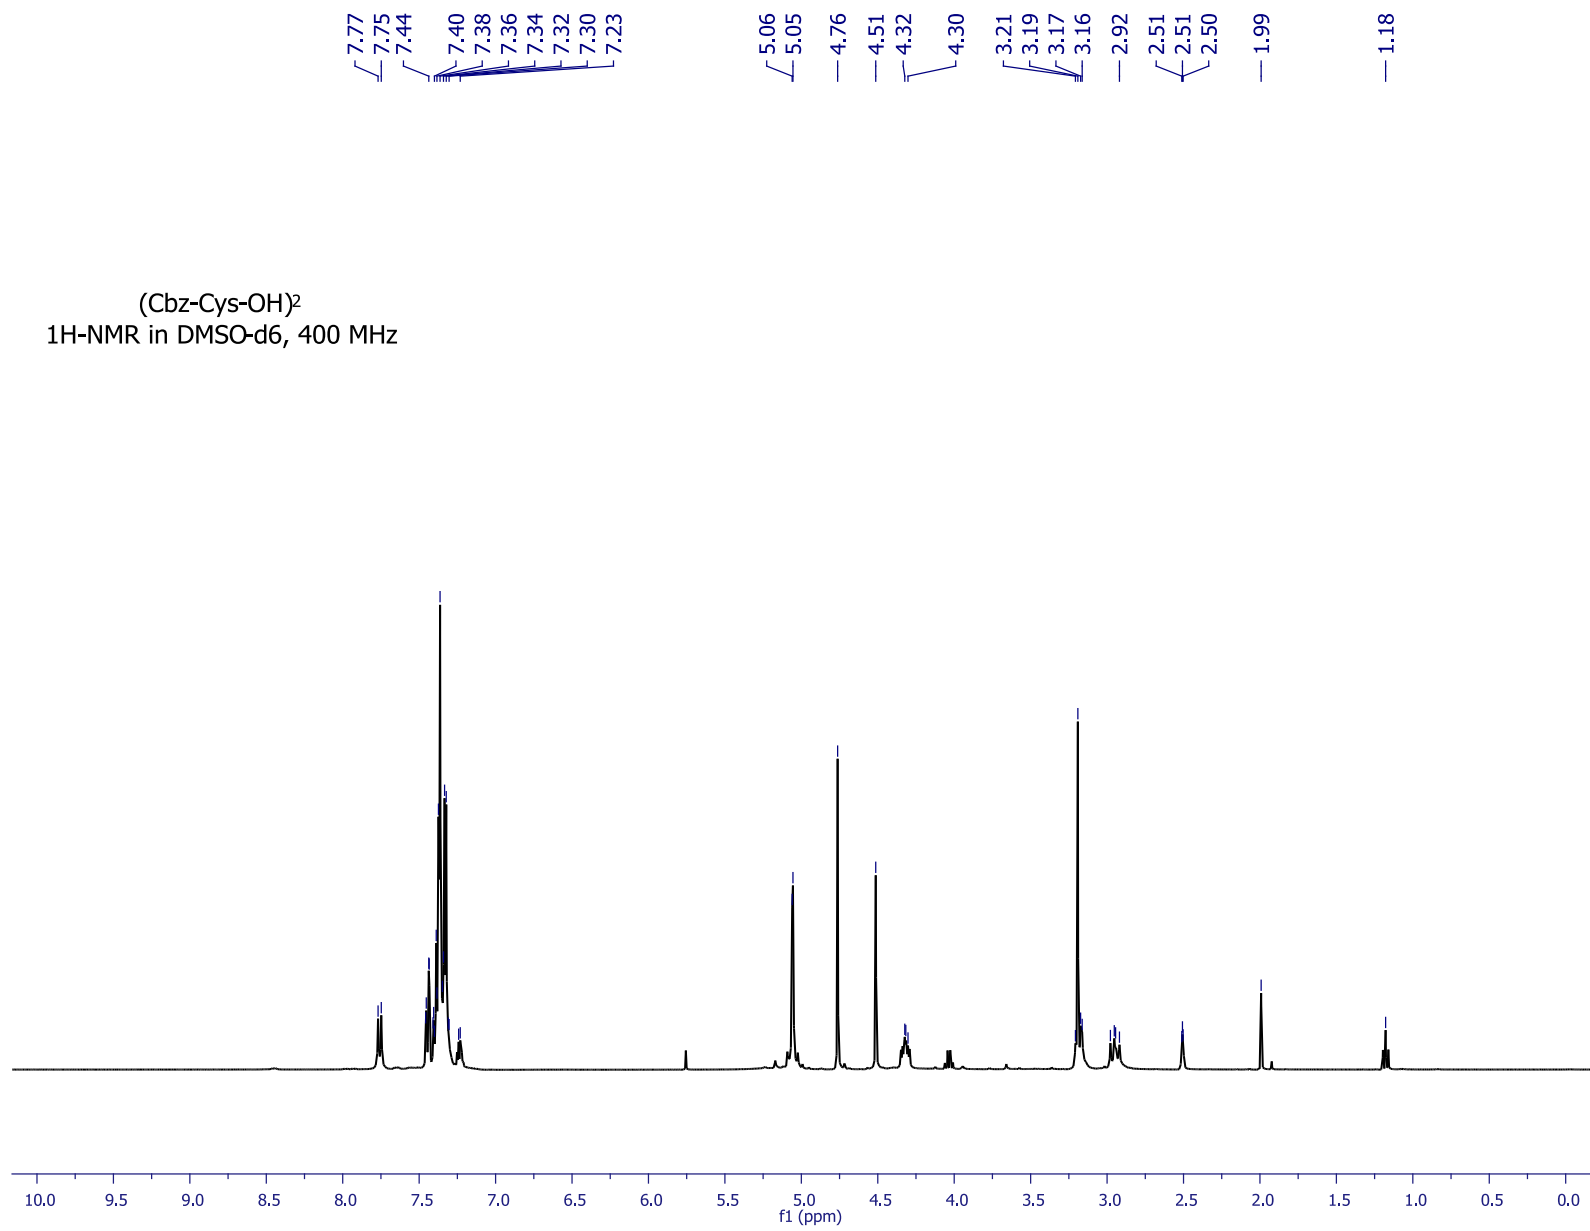

(Cbz-Cys-OH)<sup>2</sup>  
in DMSO-d<sub>6</sub>, 100 MHz

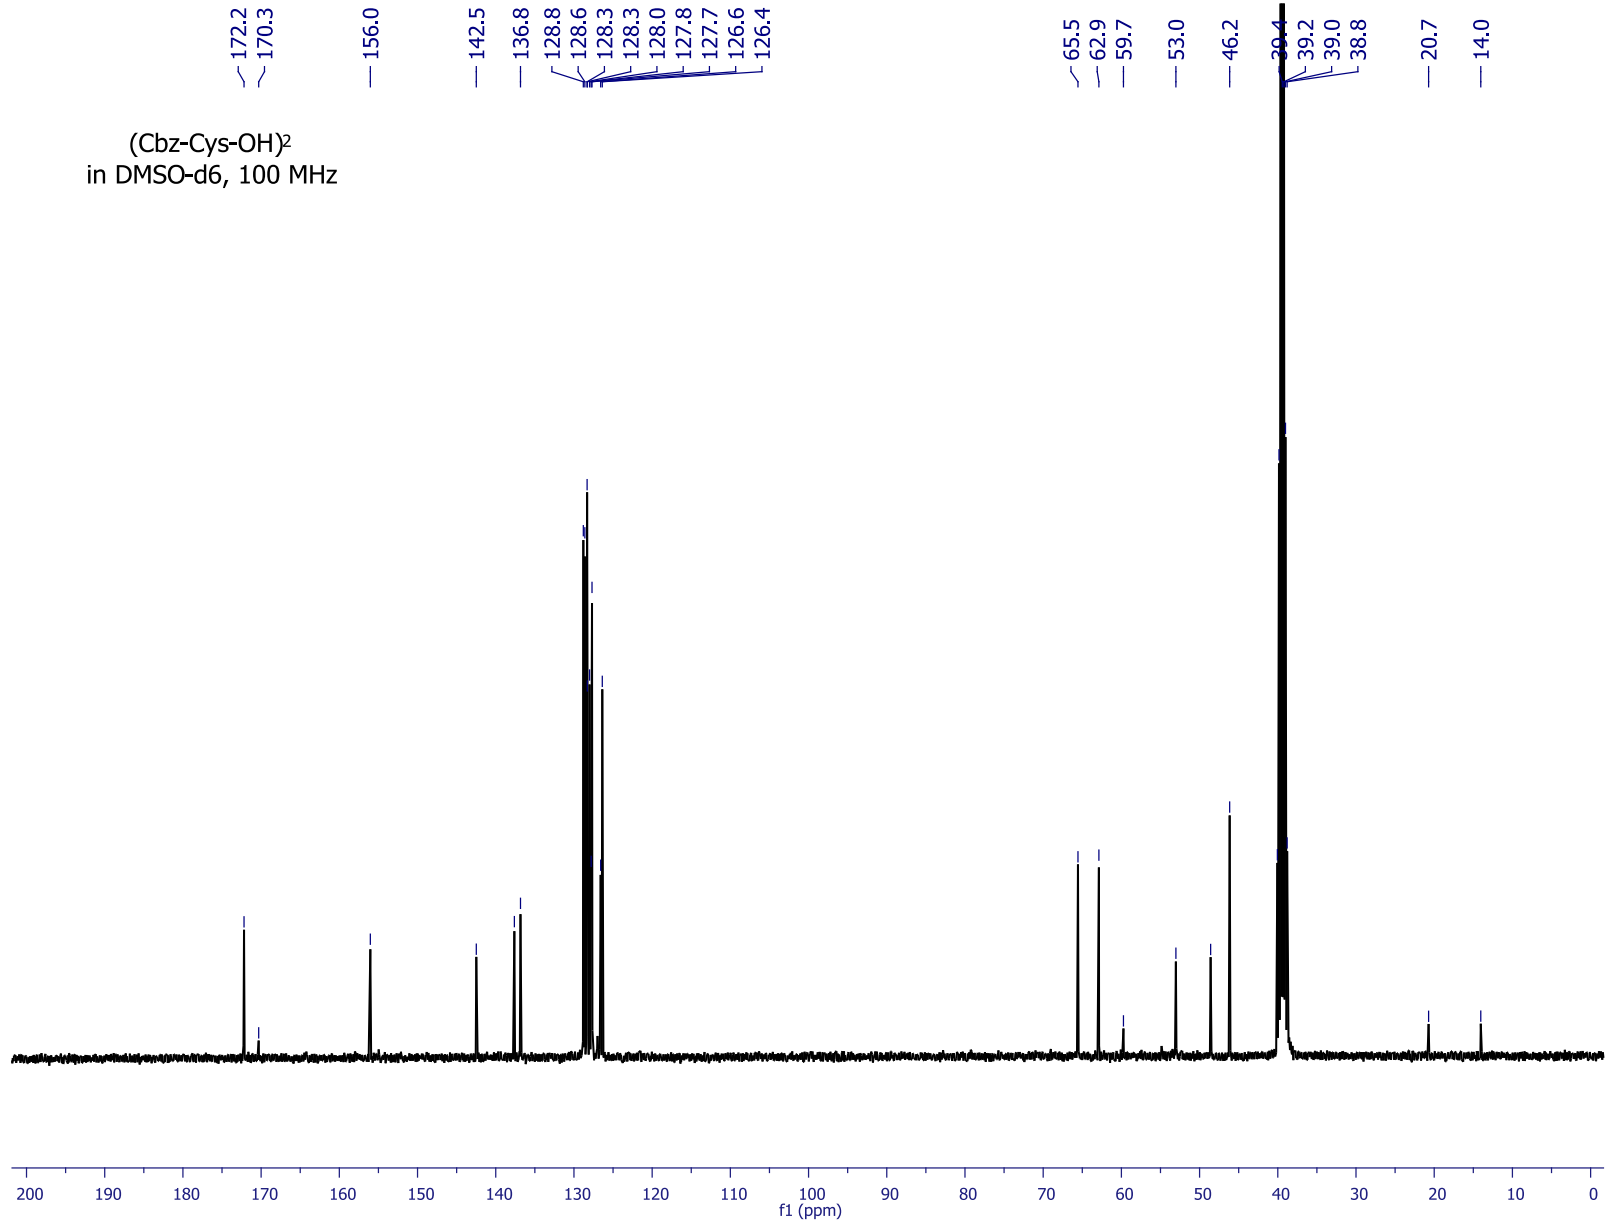

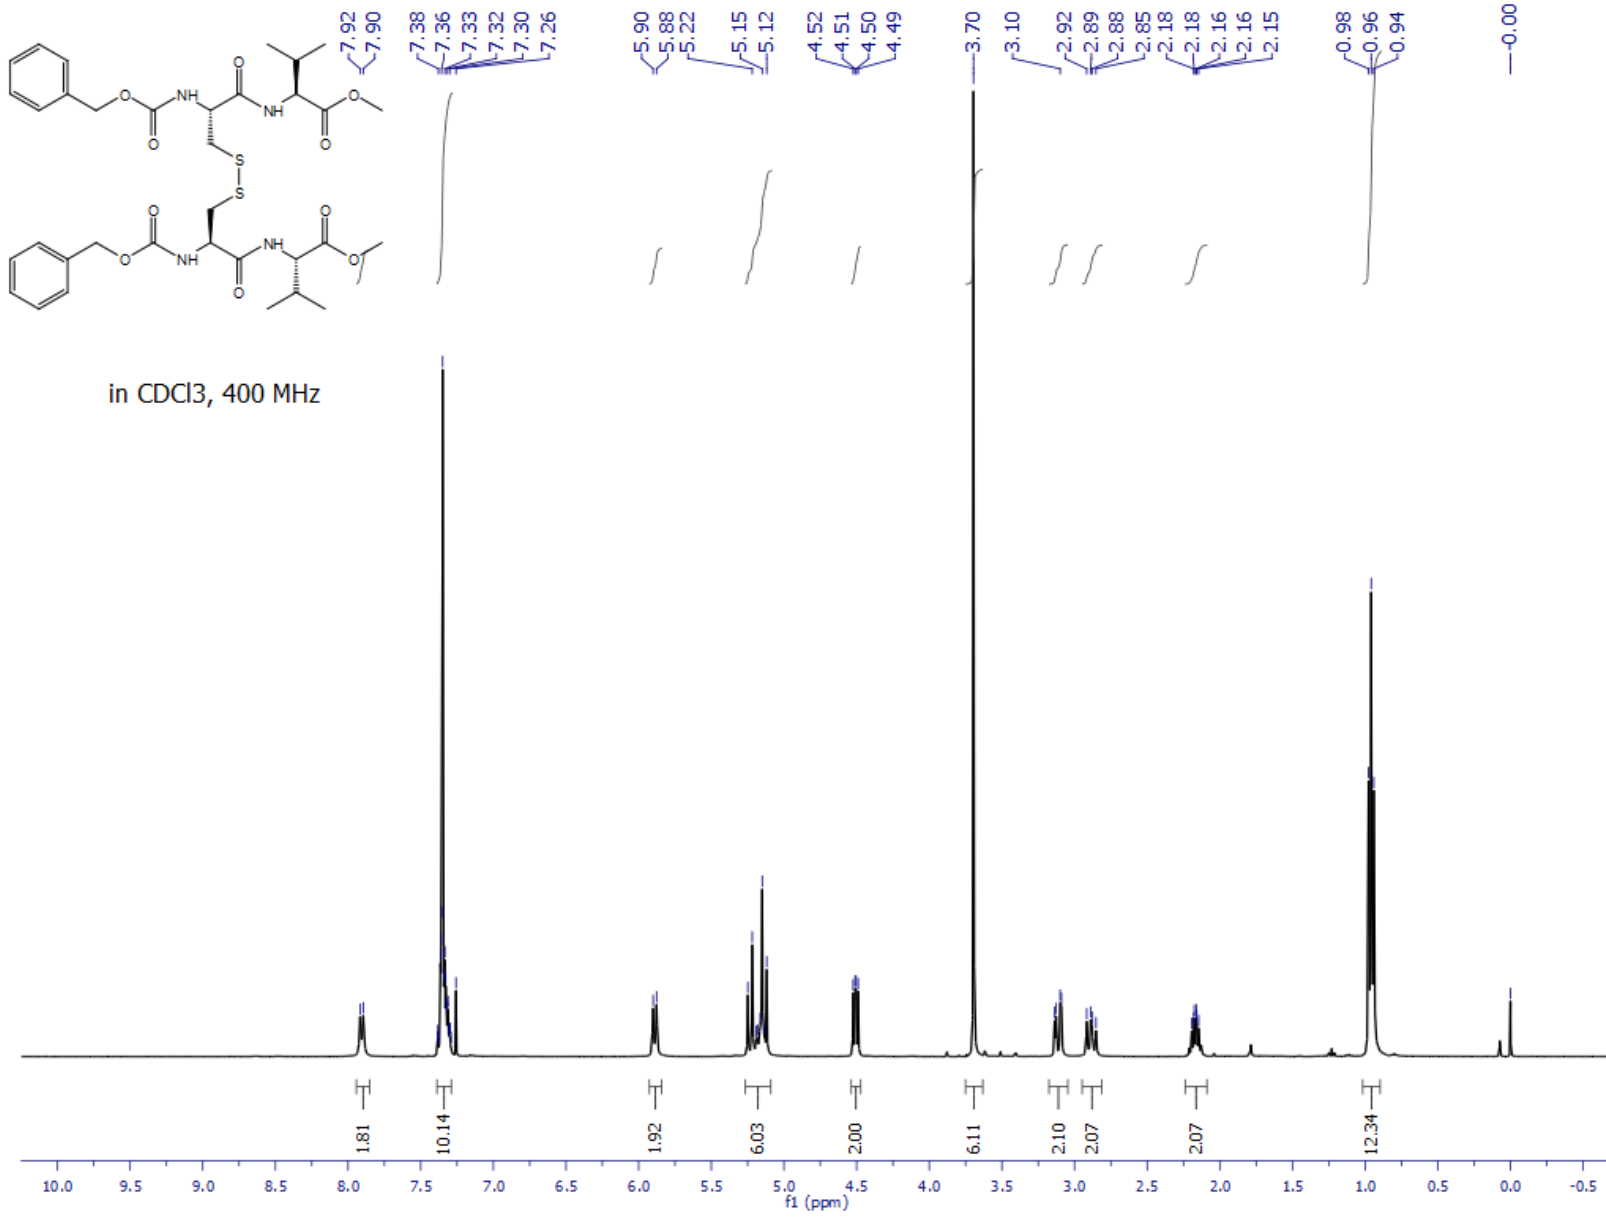

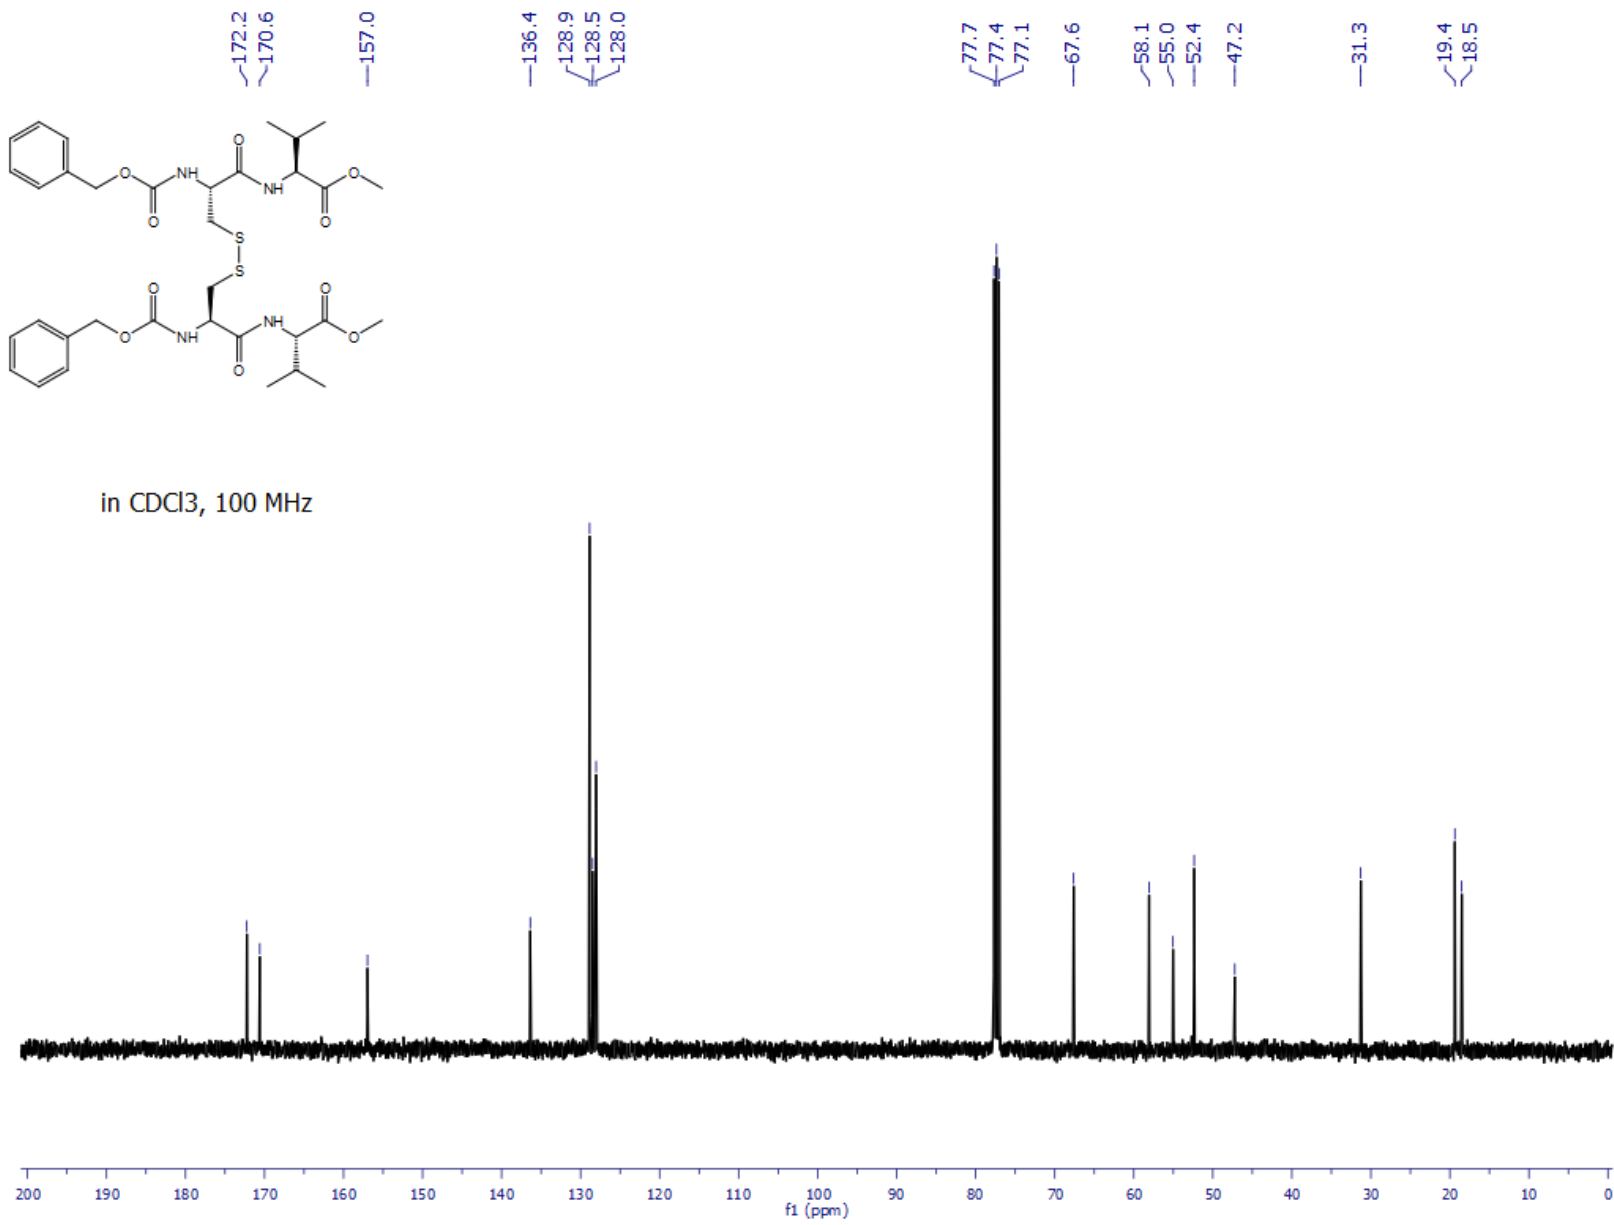

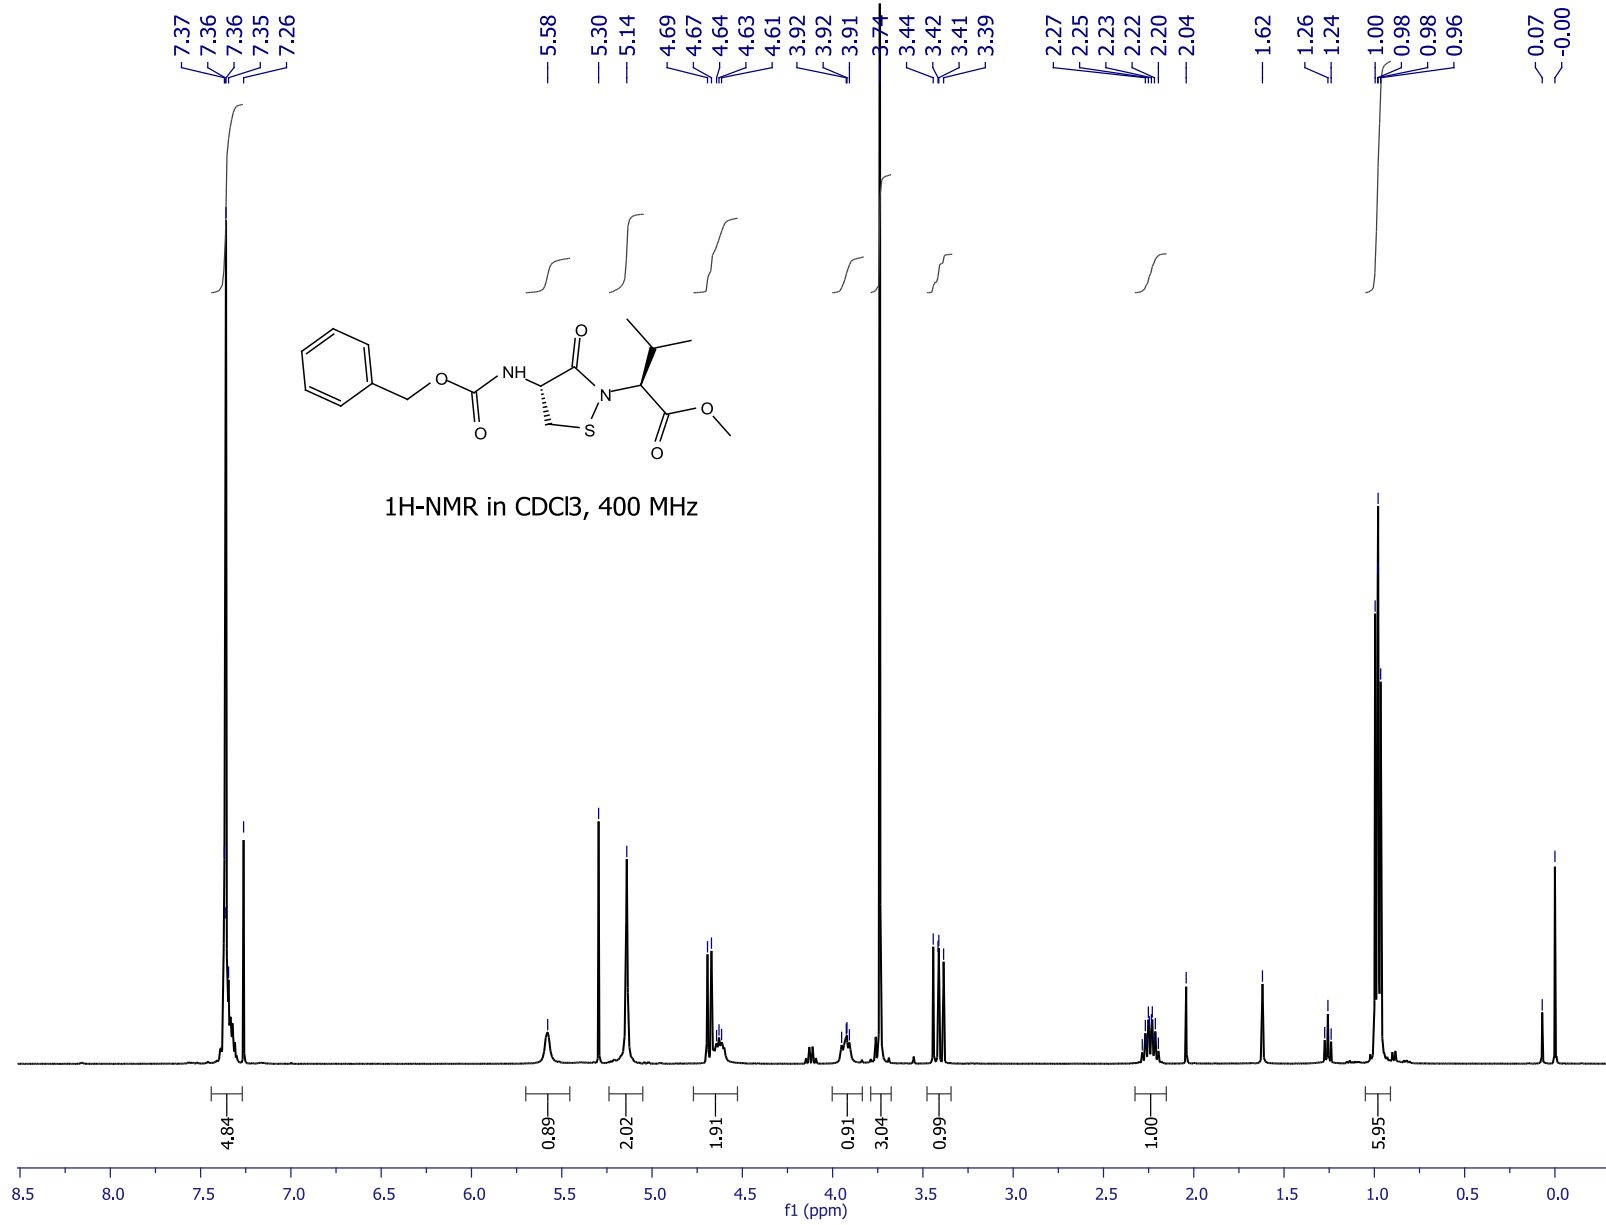



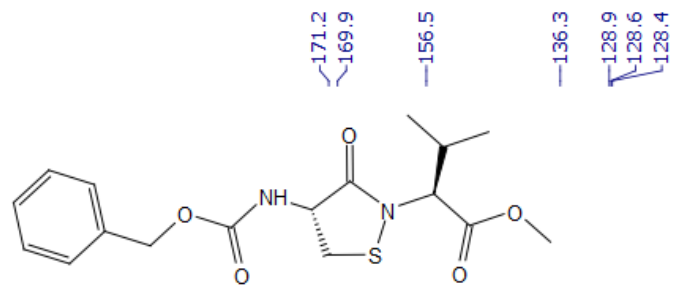

in CDCl<sub>3</sub>, 100 MHz

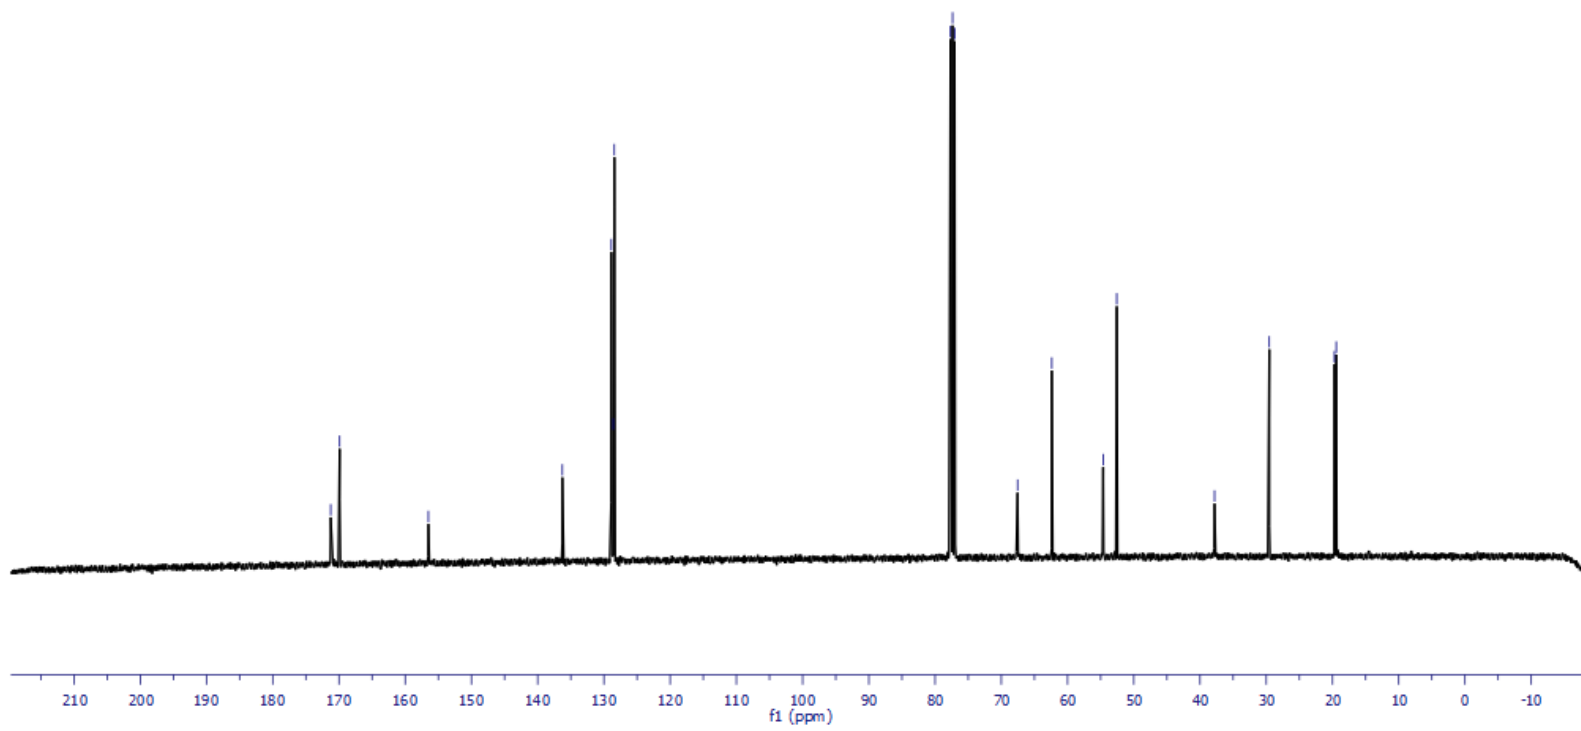

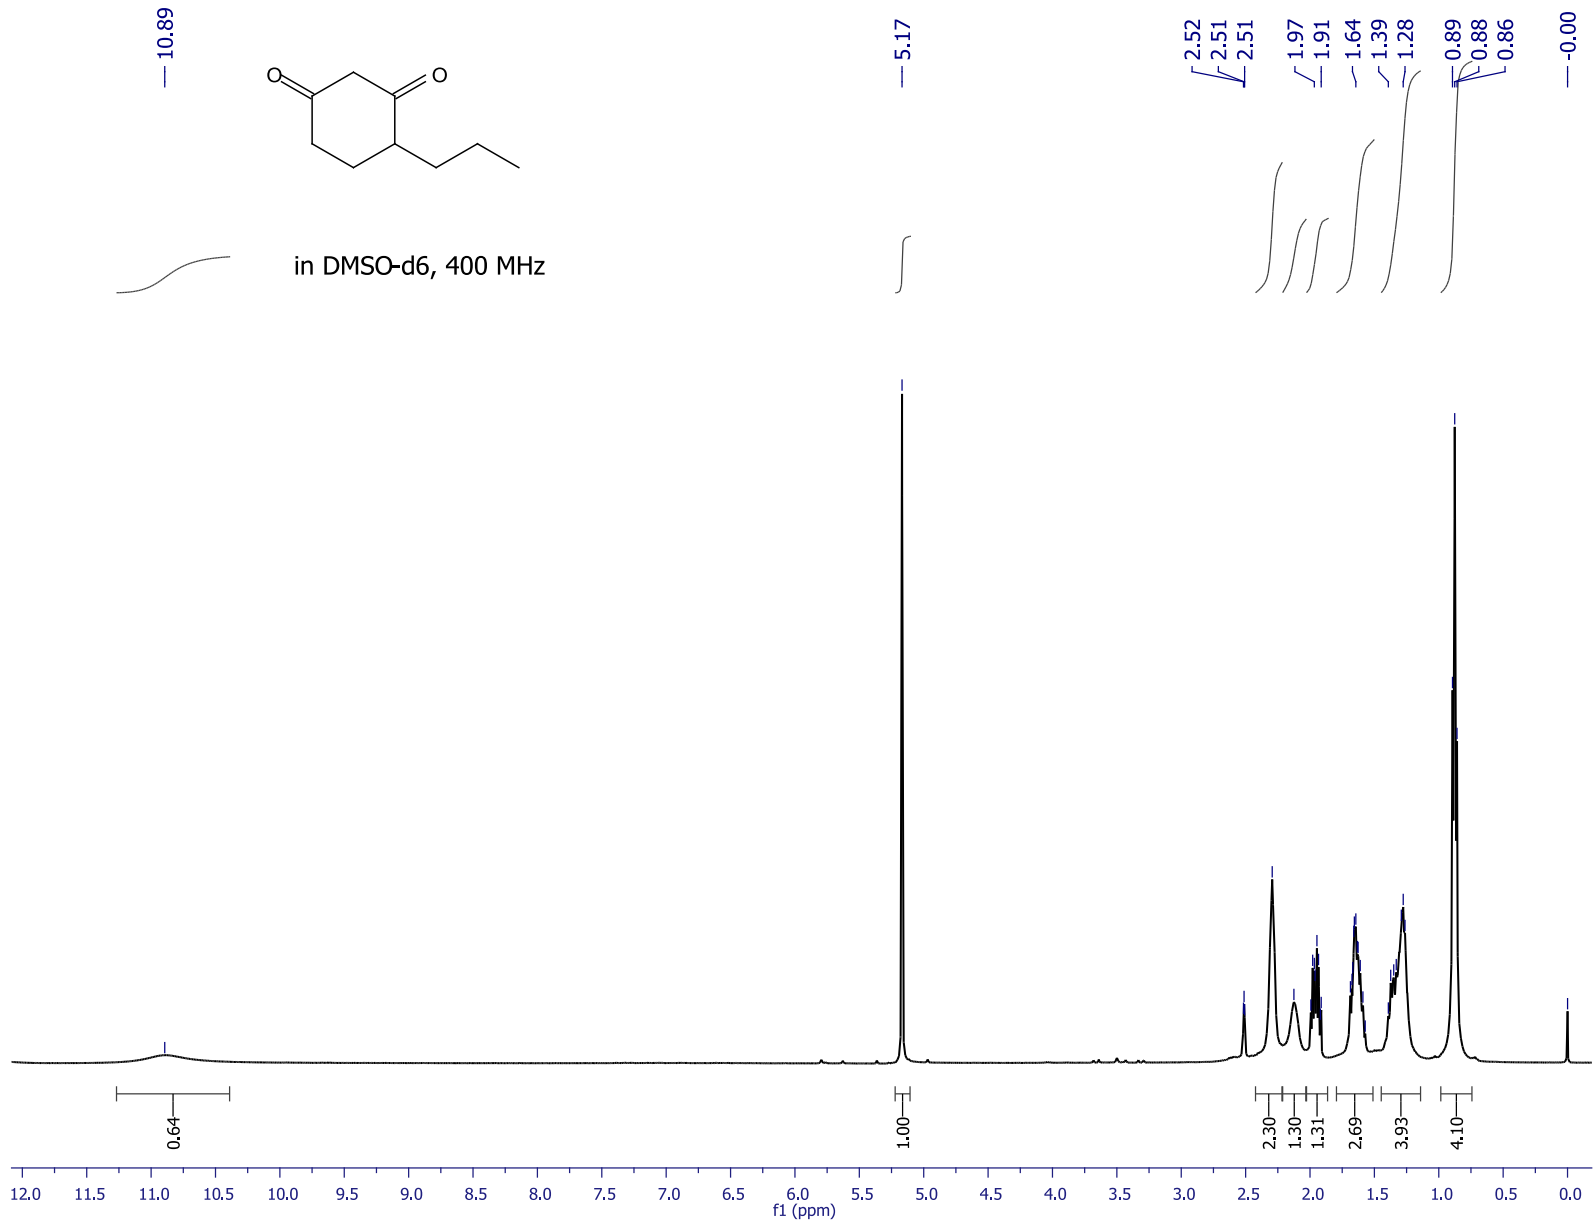

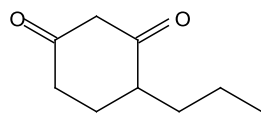

in DMSO-d6, 100 MHz

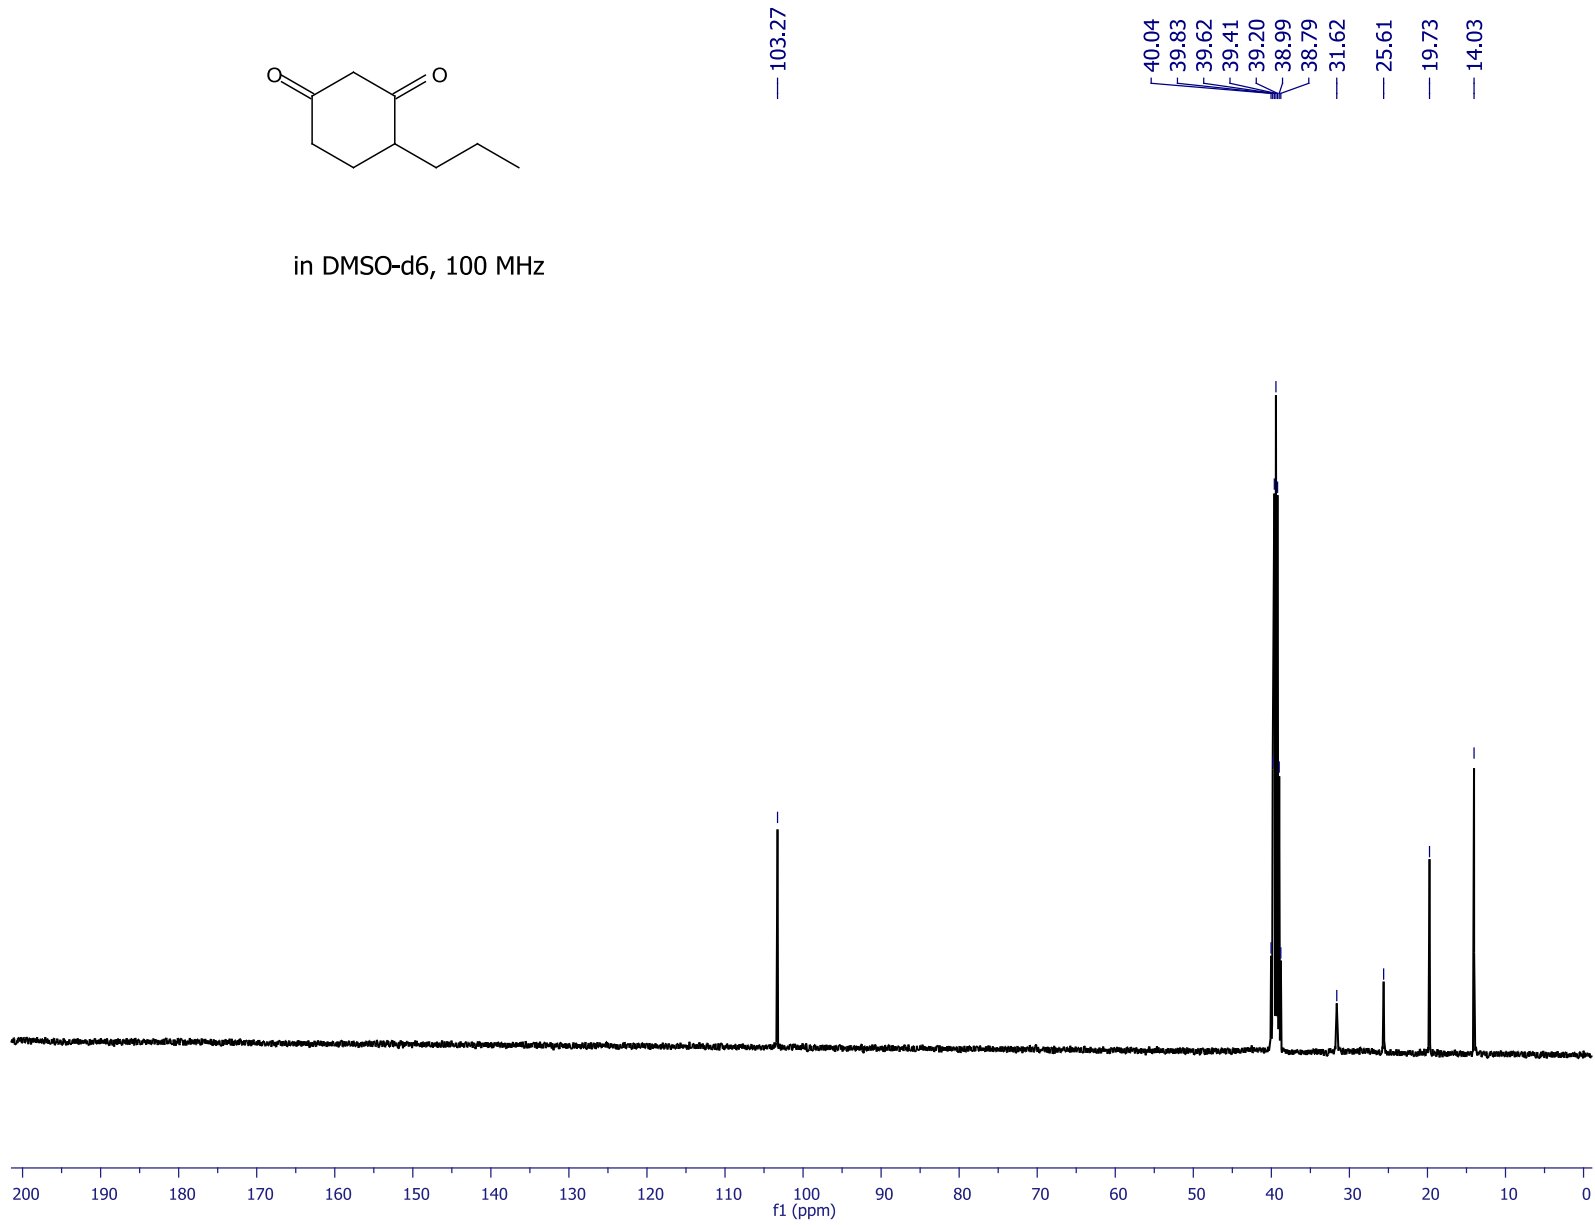

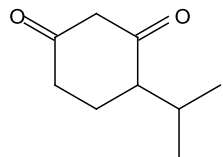

in DMSO-d<sub>6</sub>, 400 MHz

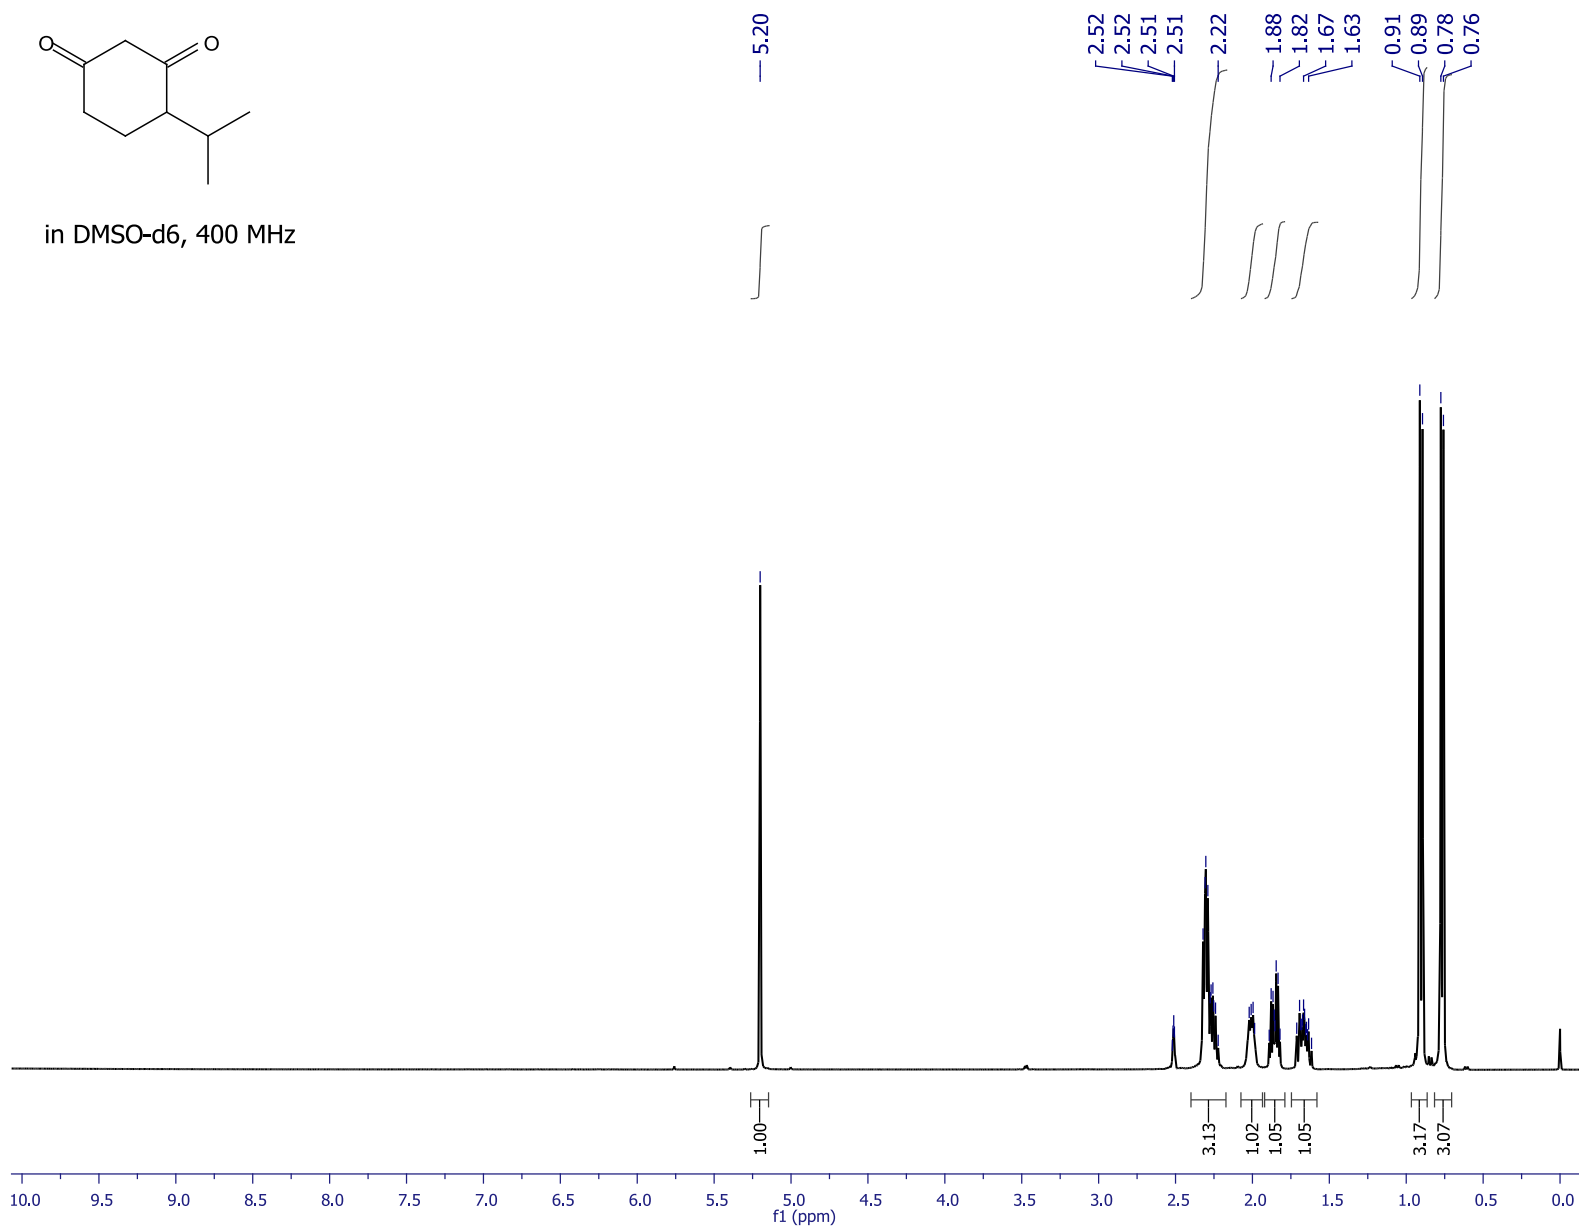

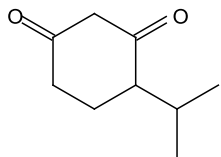

in DMSO-d<sub>6</sub>, 100 MHz

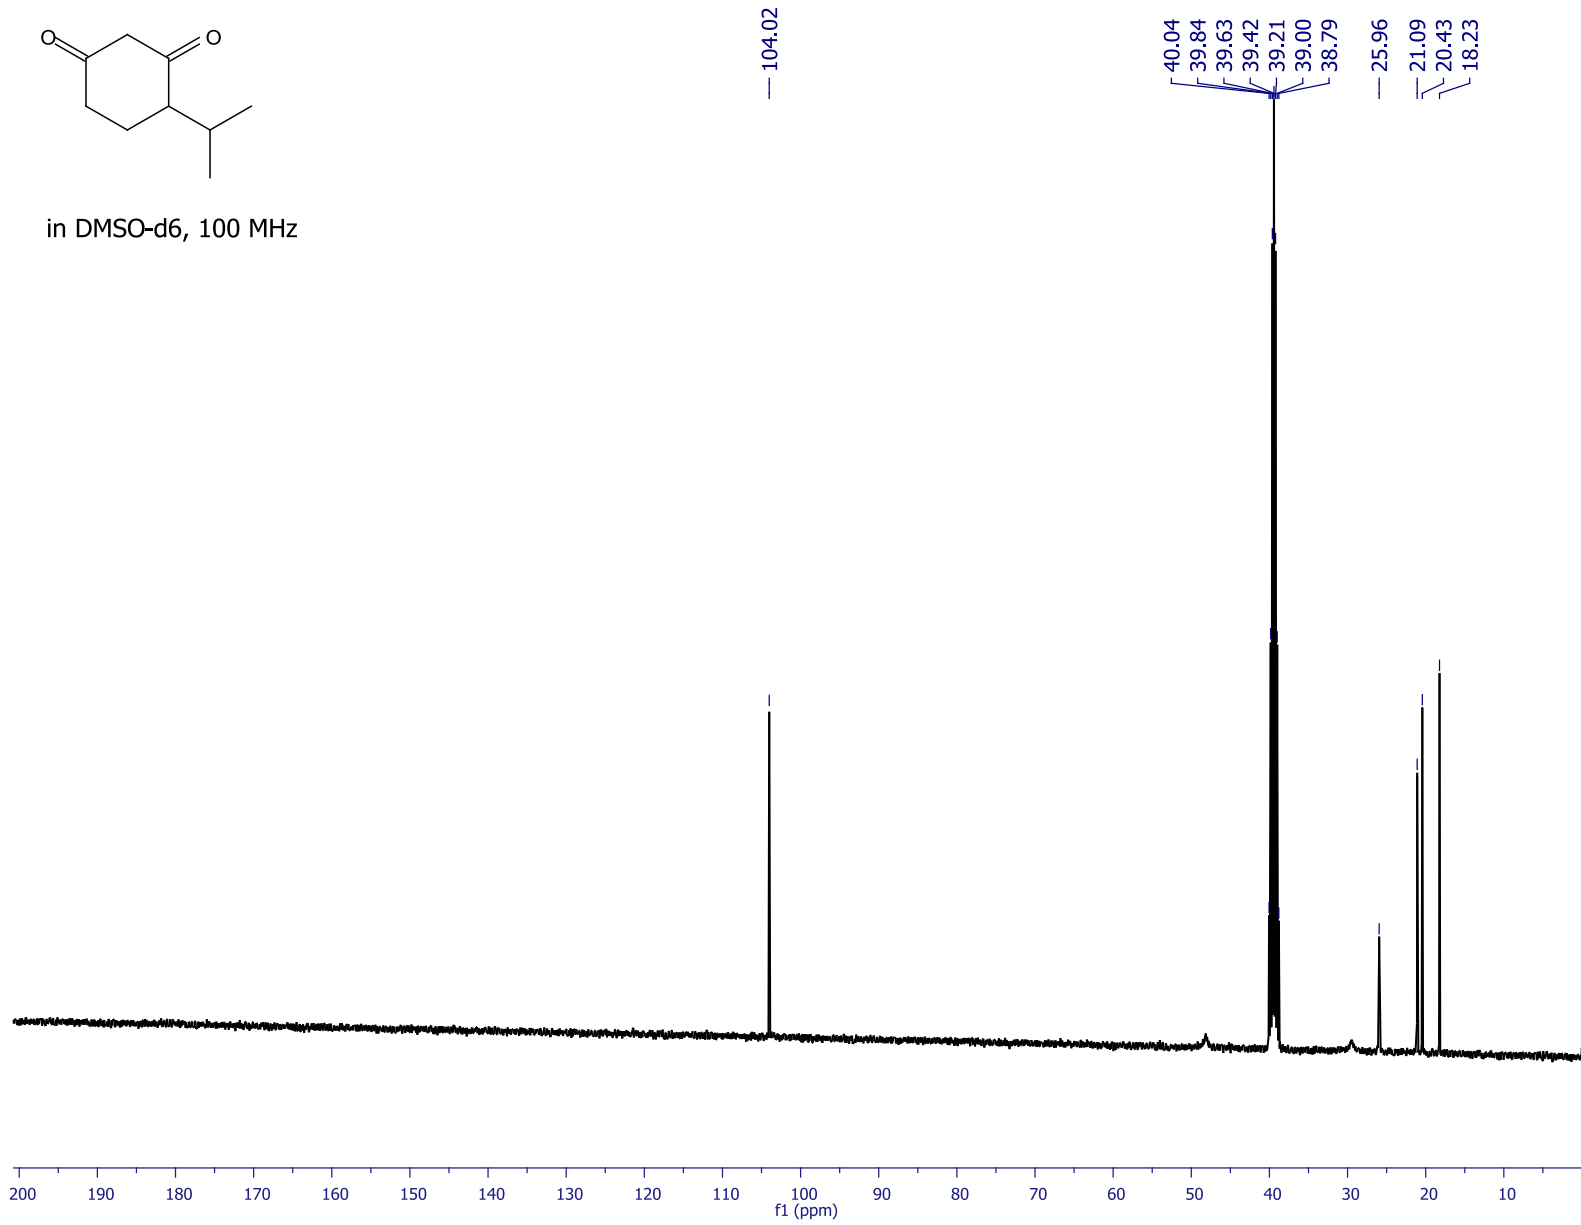

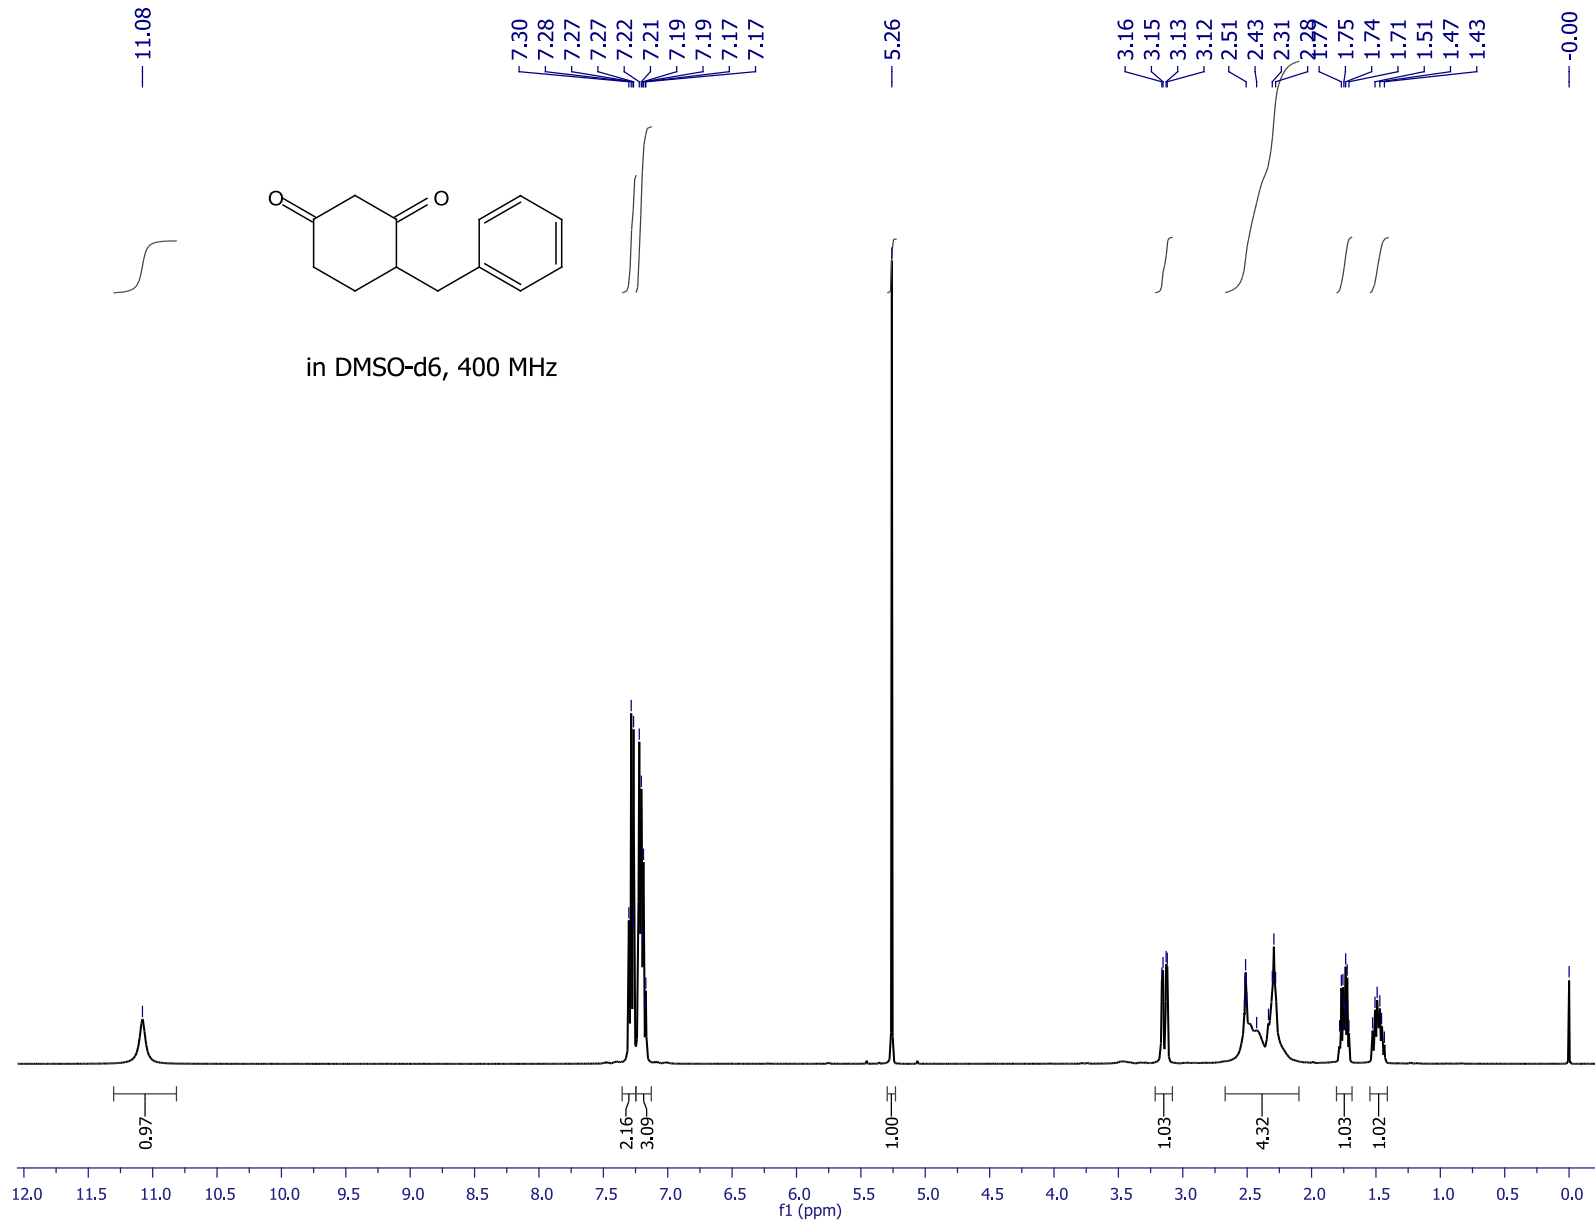

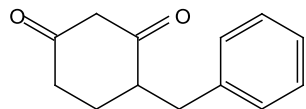

in DMSO-d6, 100 MHz

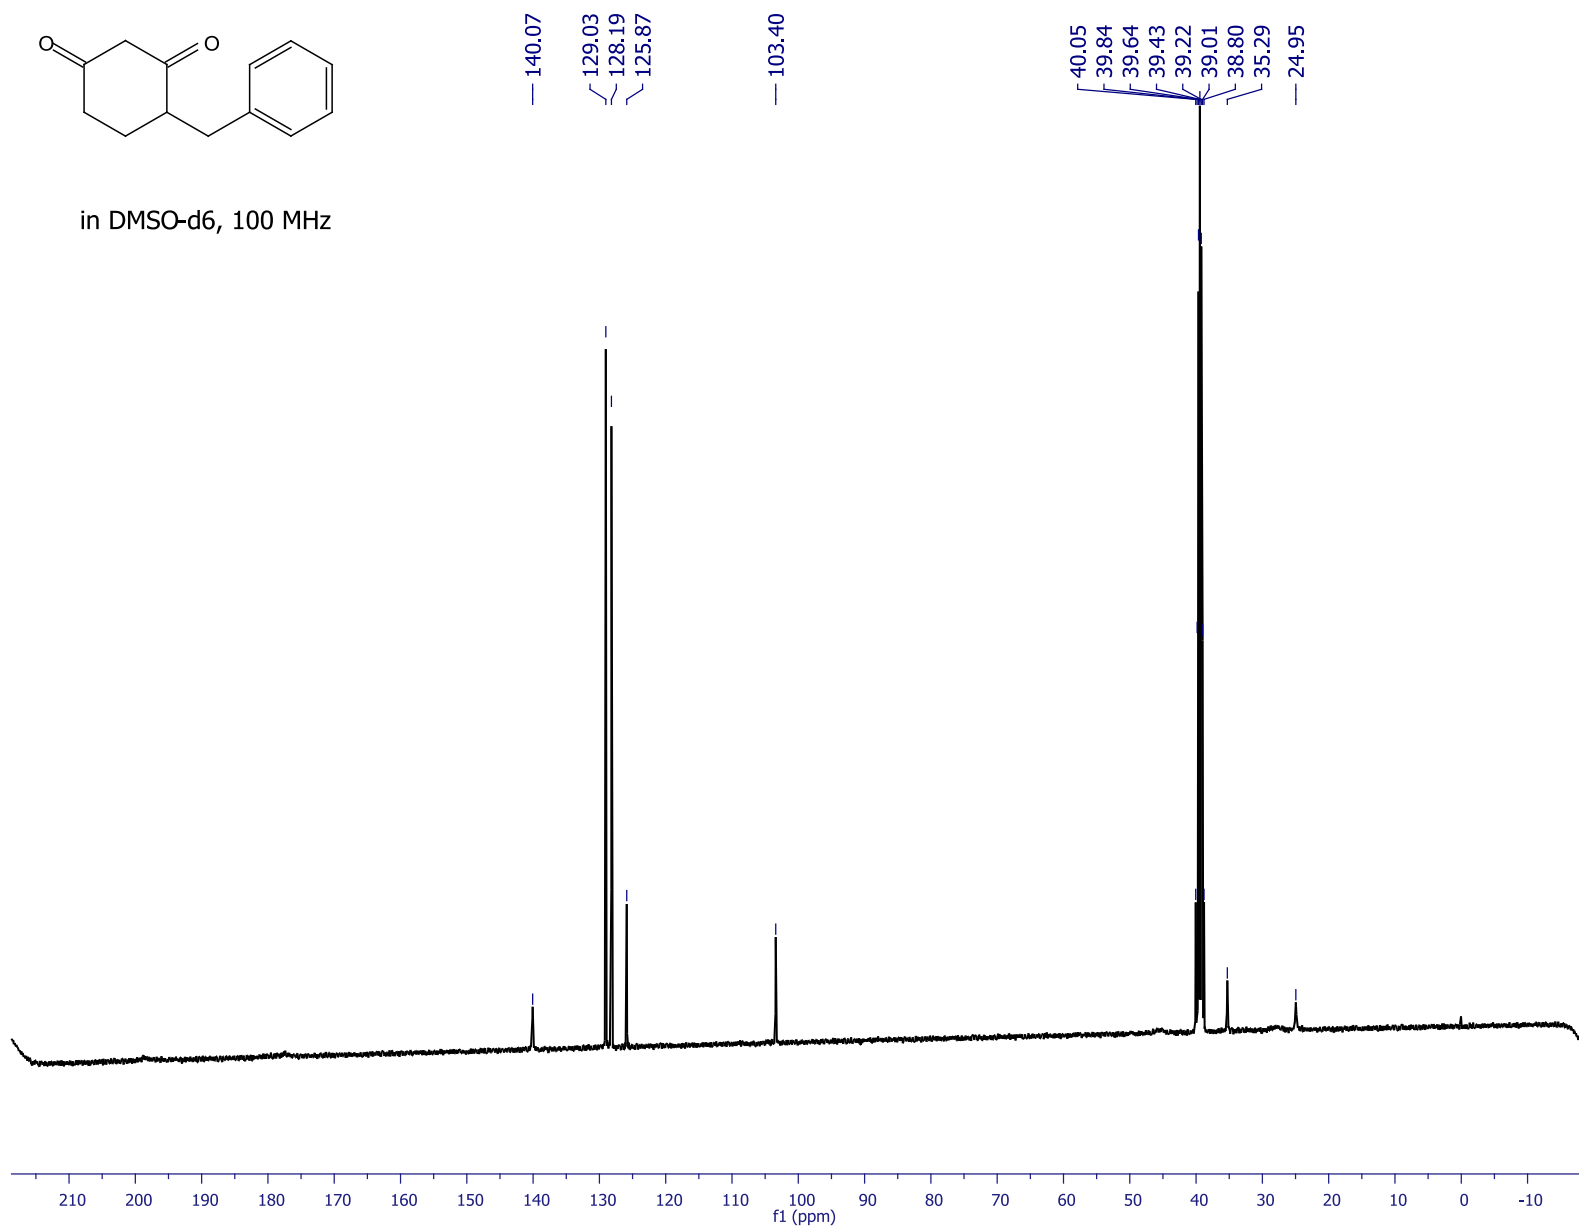

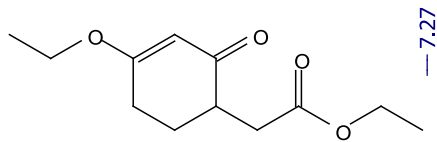

in CDCl<sub>3</sub>, 400 MHz

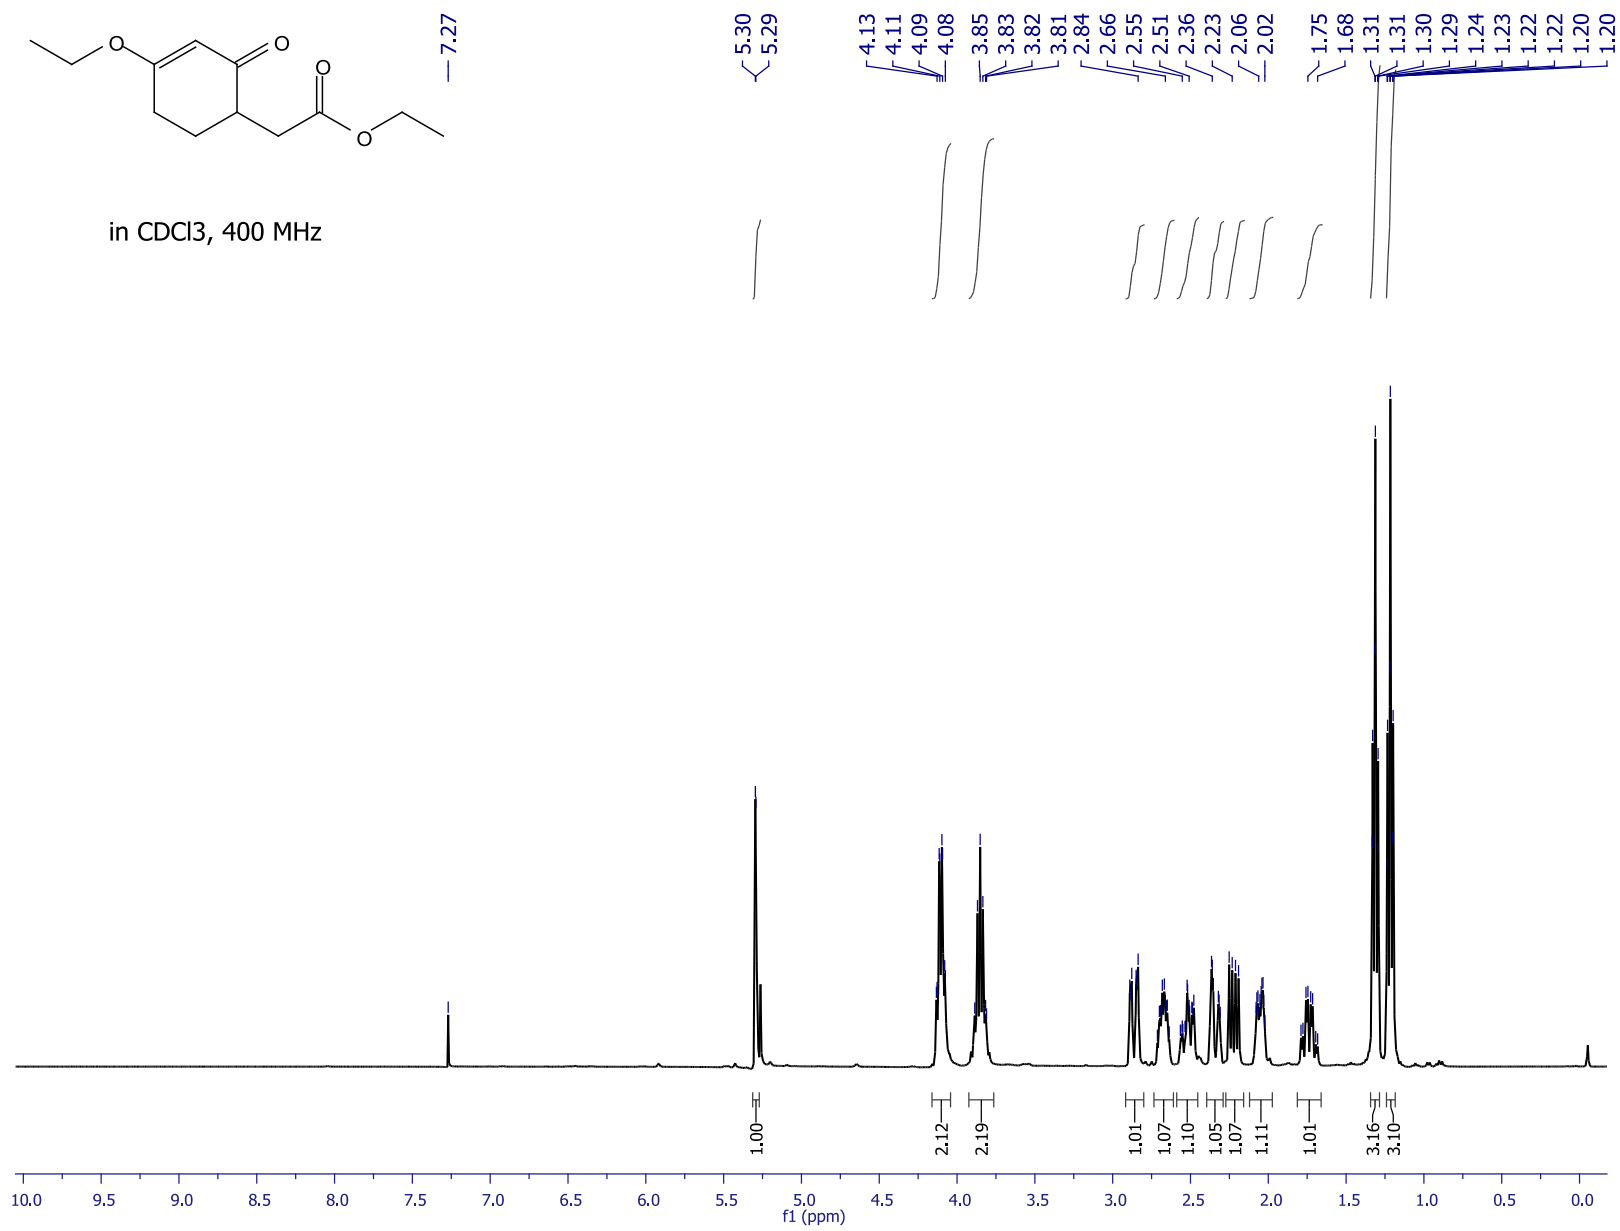



— 199.10

— 177.25  
— 172.91

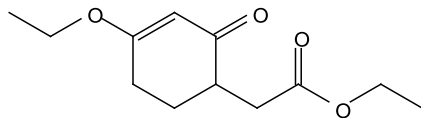

— 102.18

— 77.66  
— 77.34  
— 77.02

— 64.51  
— 60.61

— 42.48

— 34.94

— 29.18  
— 27.30

— 14.39  
— 14.30

in CDCl<sub>3</sub>, 400 MHz

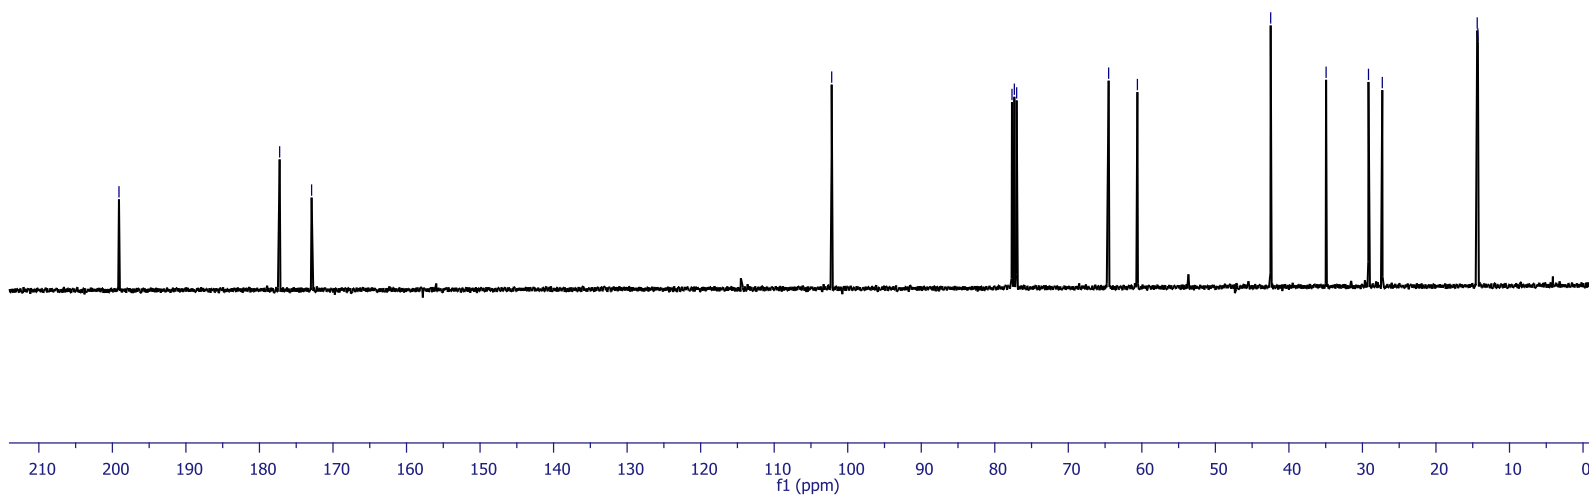

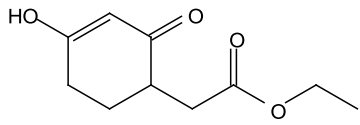

in CDCl<sub>3</sub>, 400 MHz

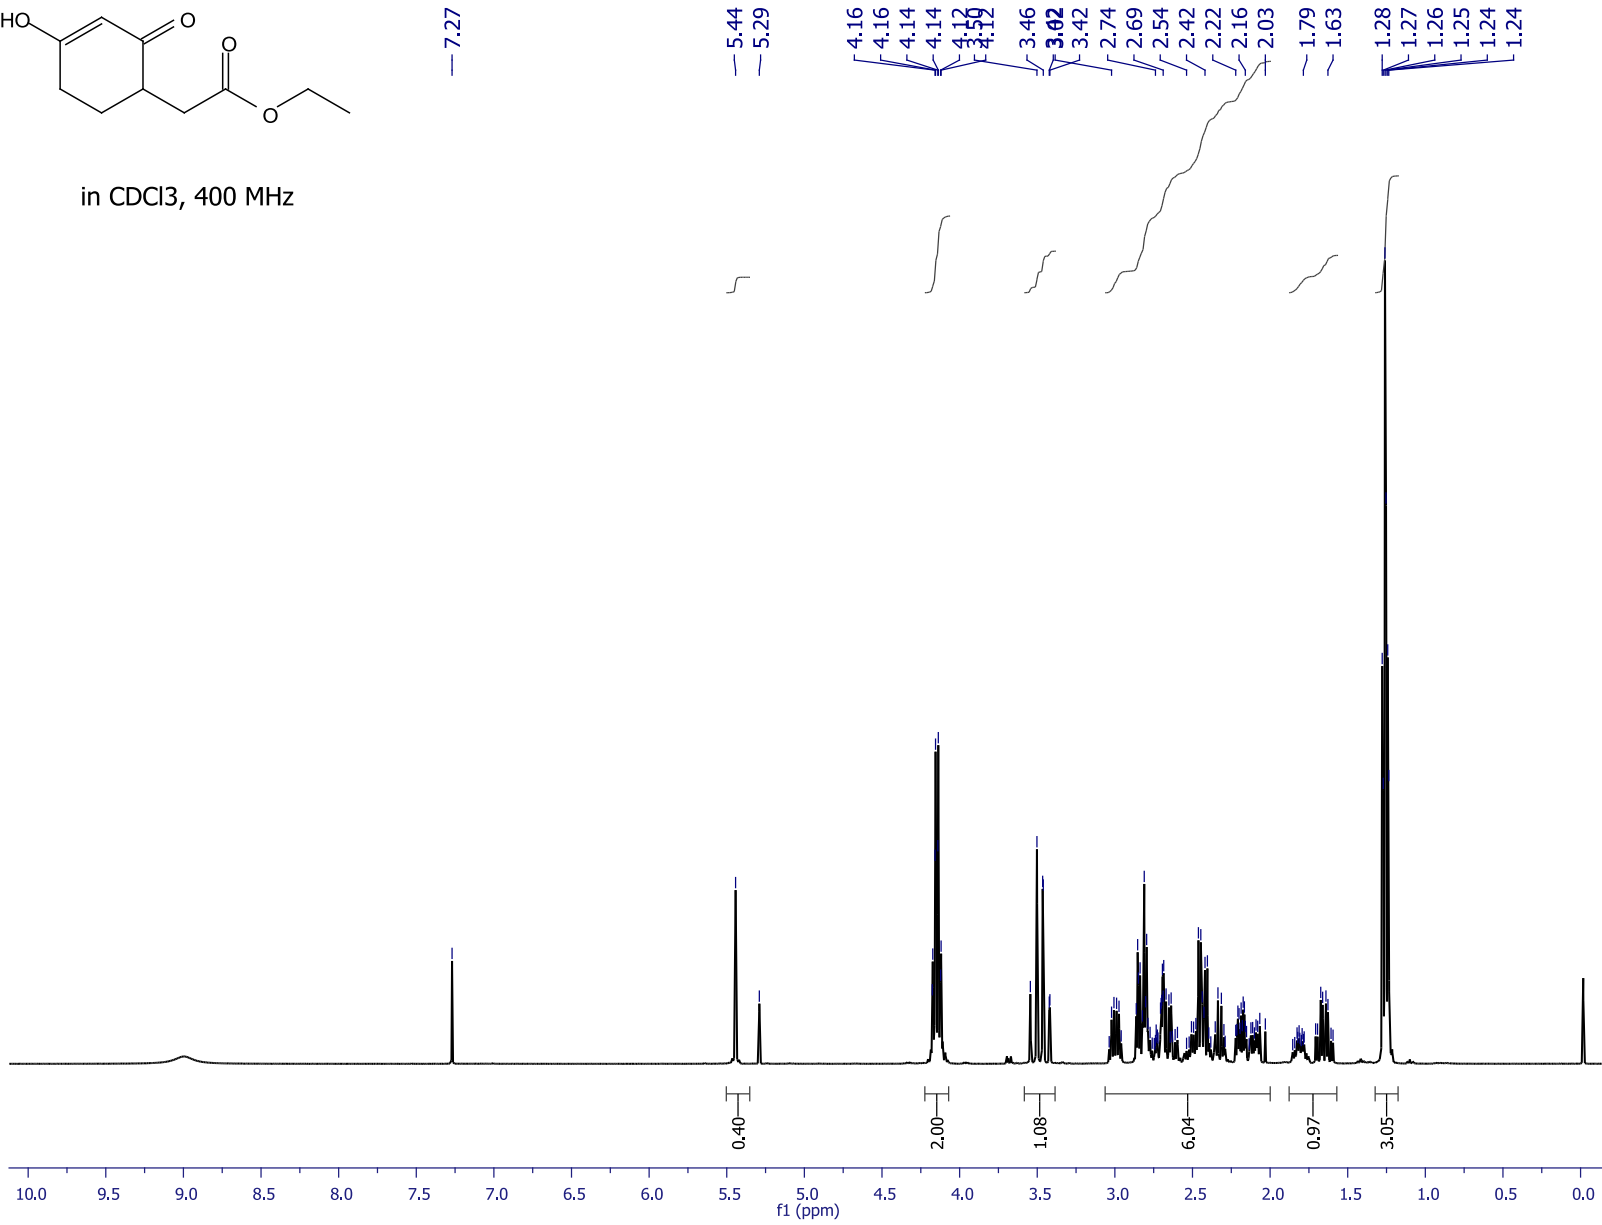

203.80  
203.31  
195.80  
185.87  
173.22  
172.19

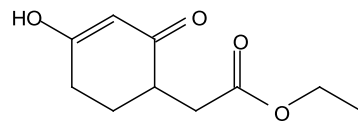

104.50

77.66  
77.34  
77.02  
61.19  
61.10  
58.40  
46.07  
40.09  
35.48  
34.21  
30.44  
27.32  
24.68  
14.43

in CDCl<sub>3</sub>, 100 MHz

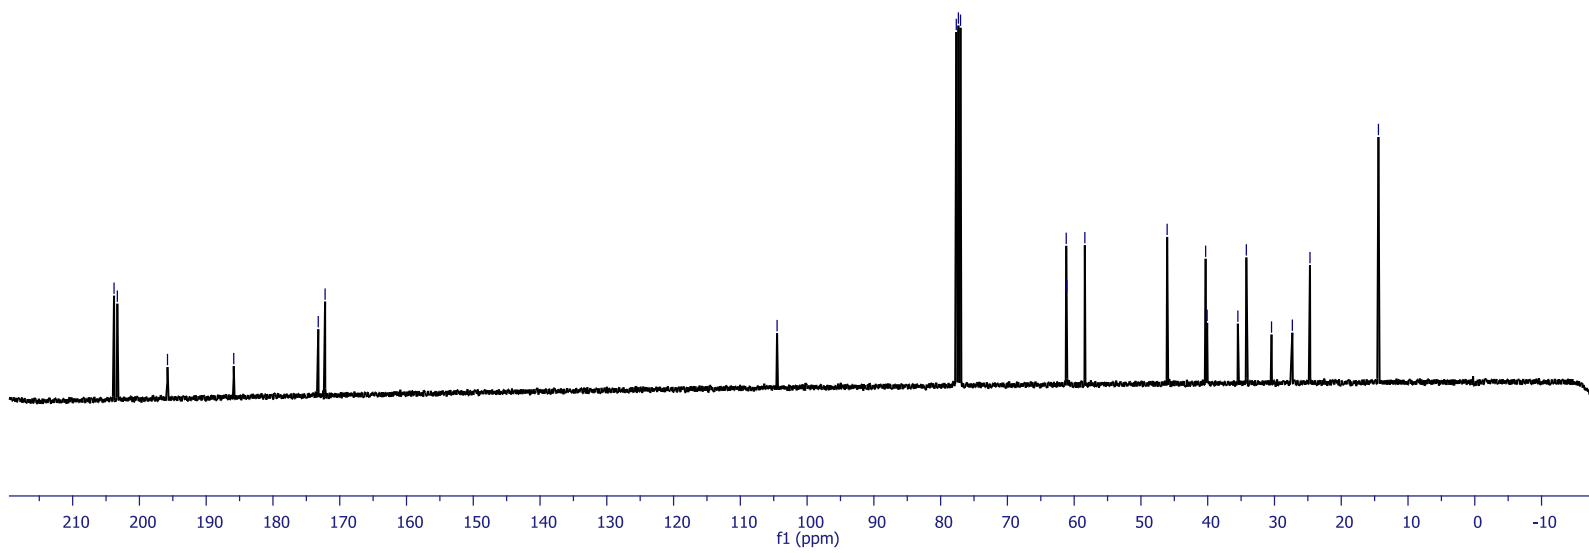

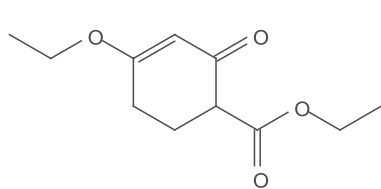

in CDCl<sub>3</sub>, 400 MHz

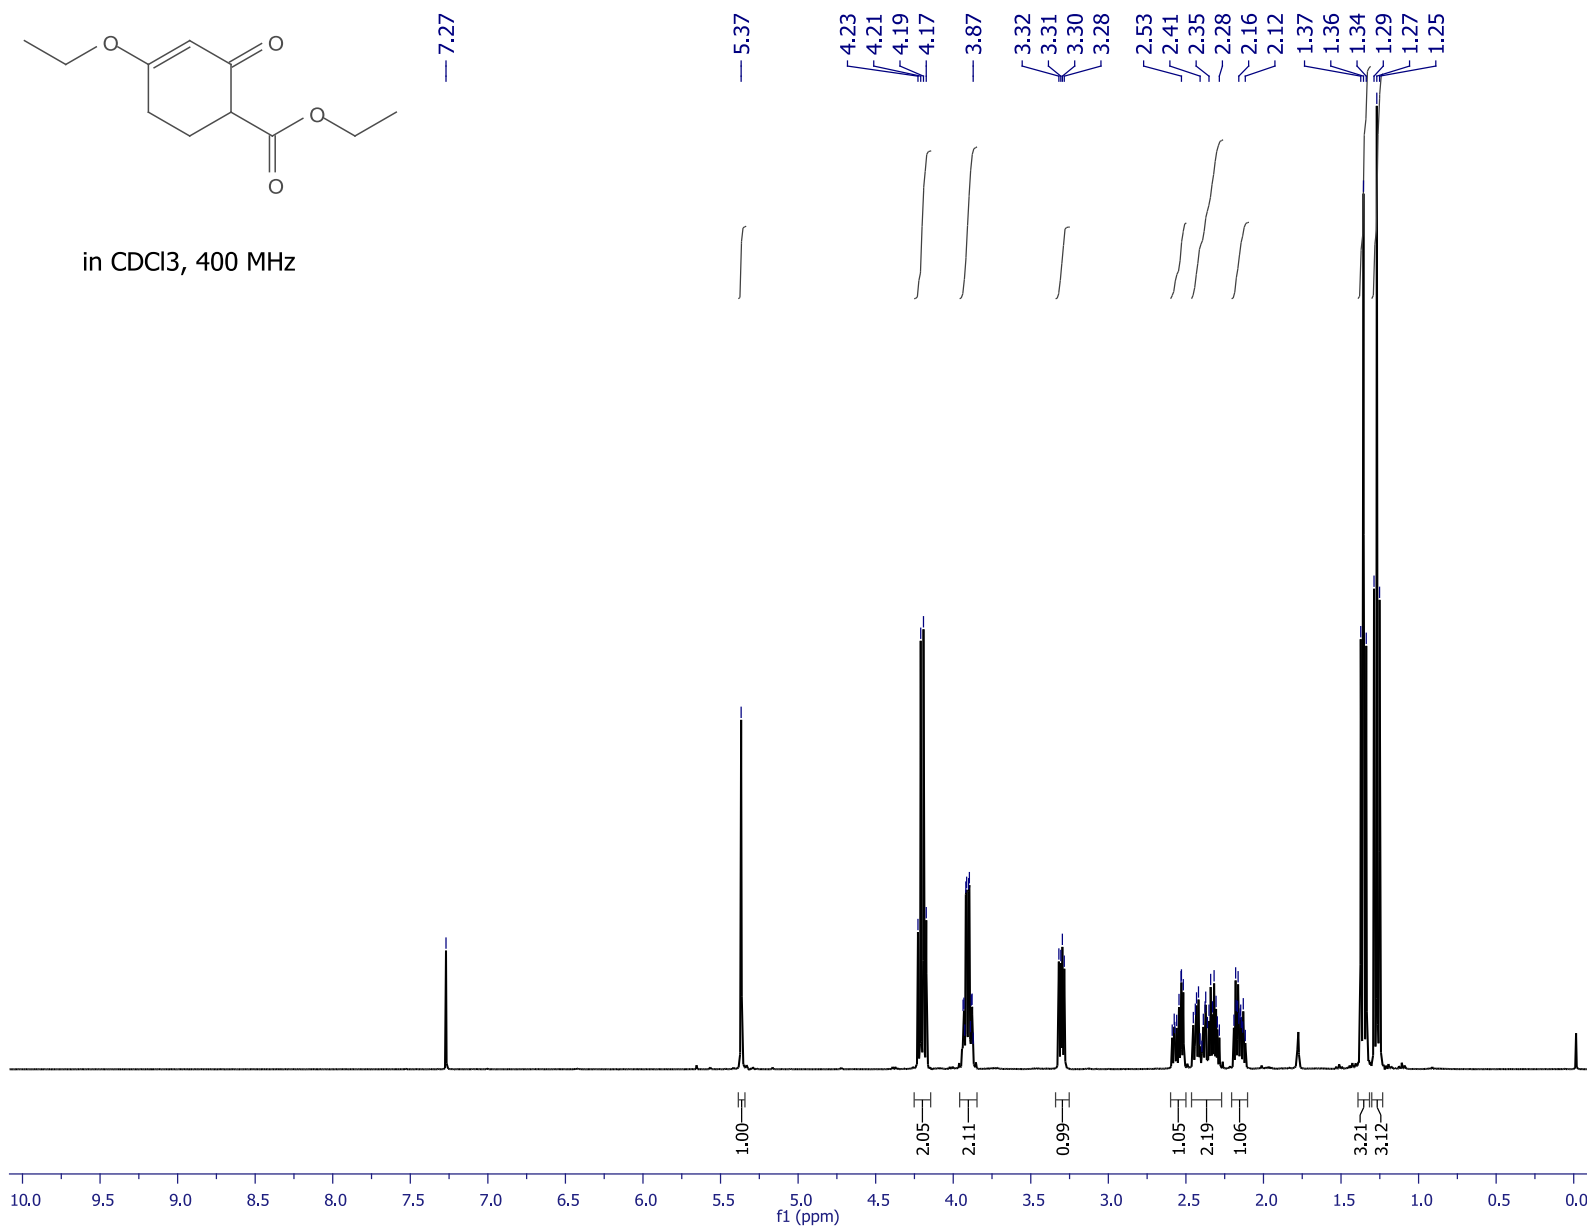

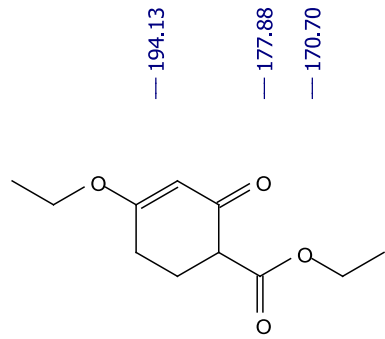

in CDCl<sub>3</sub>, 100 MHz

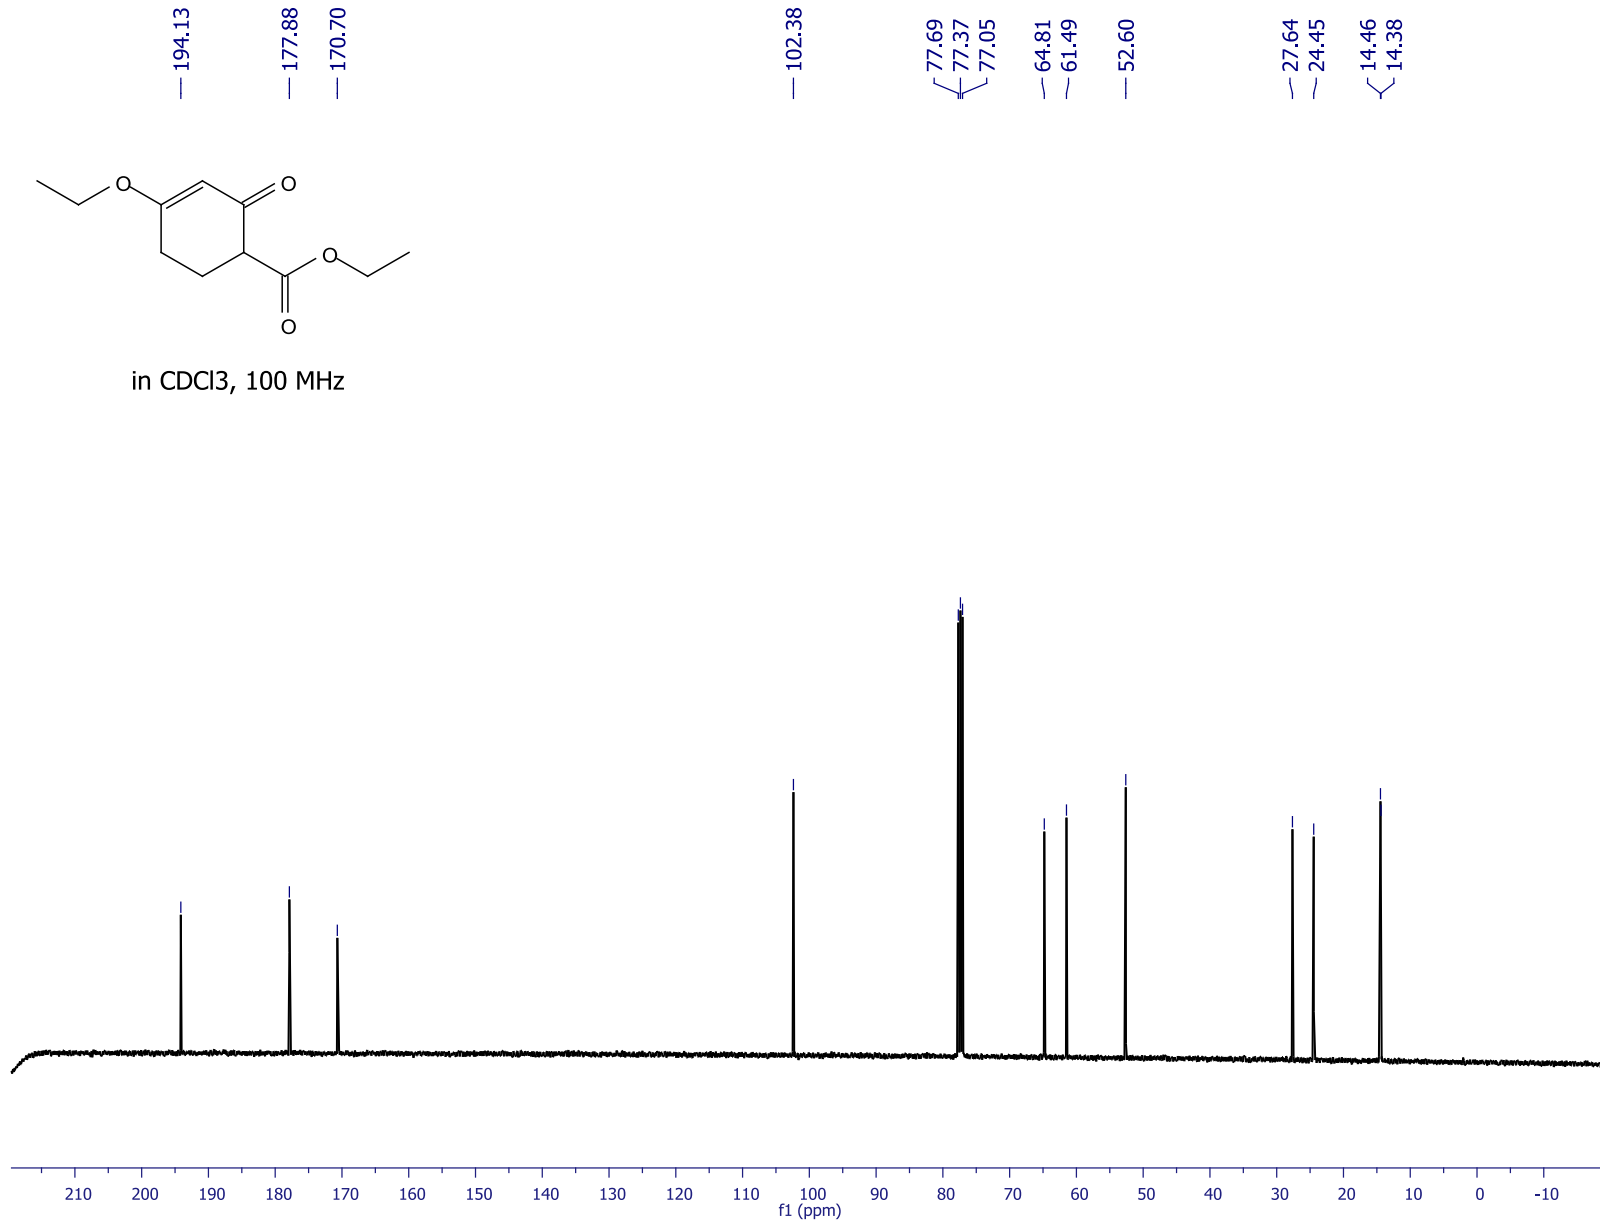

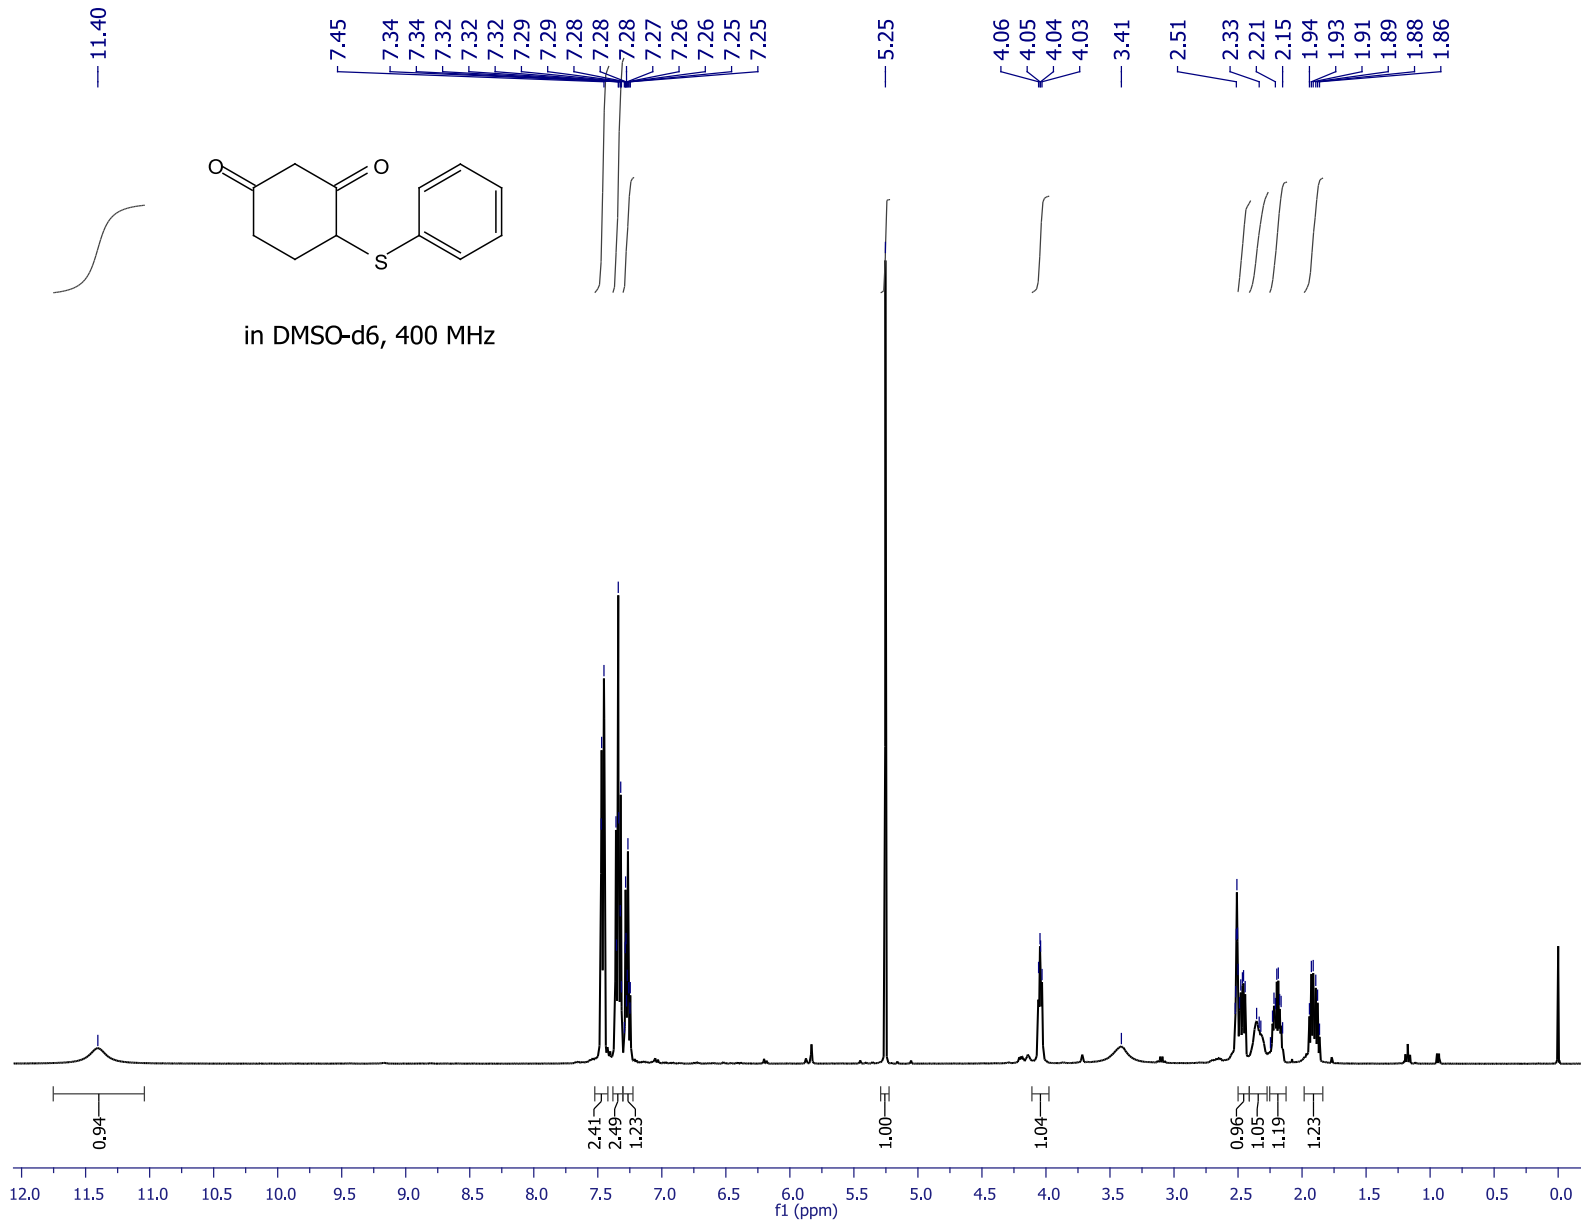

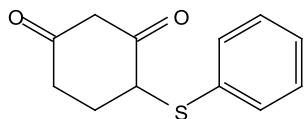

in DMSO-d6, 100 MHz

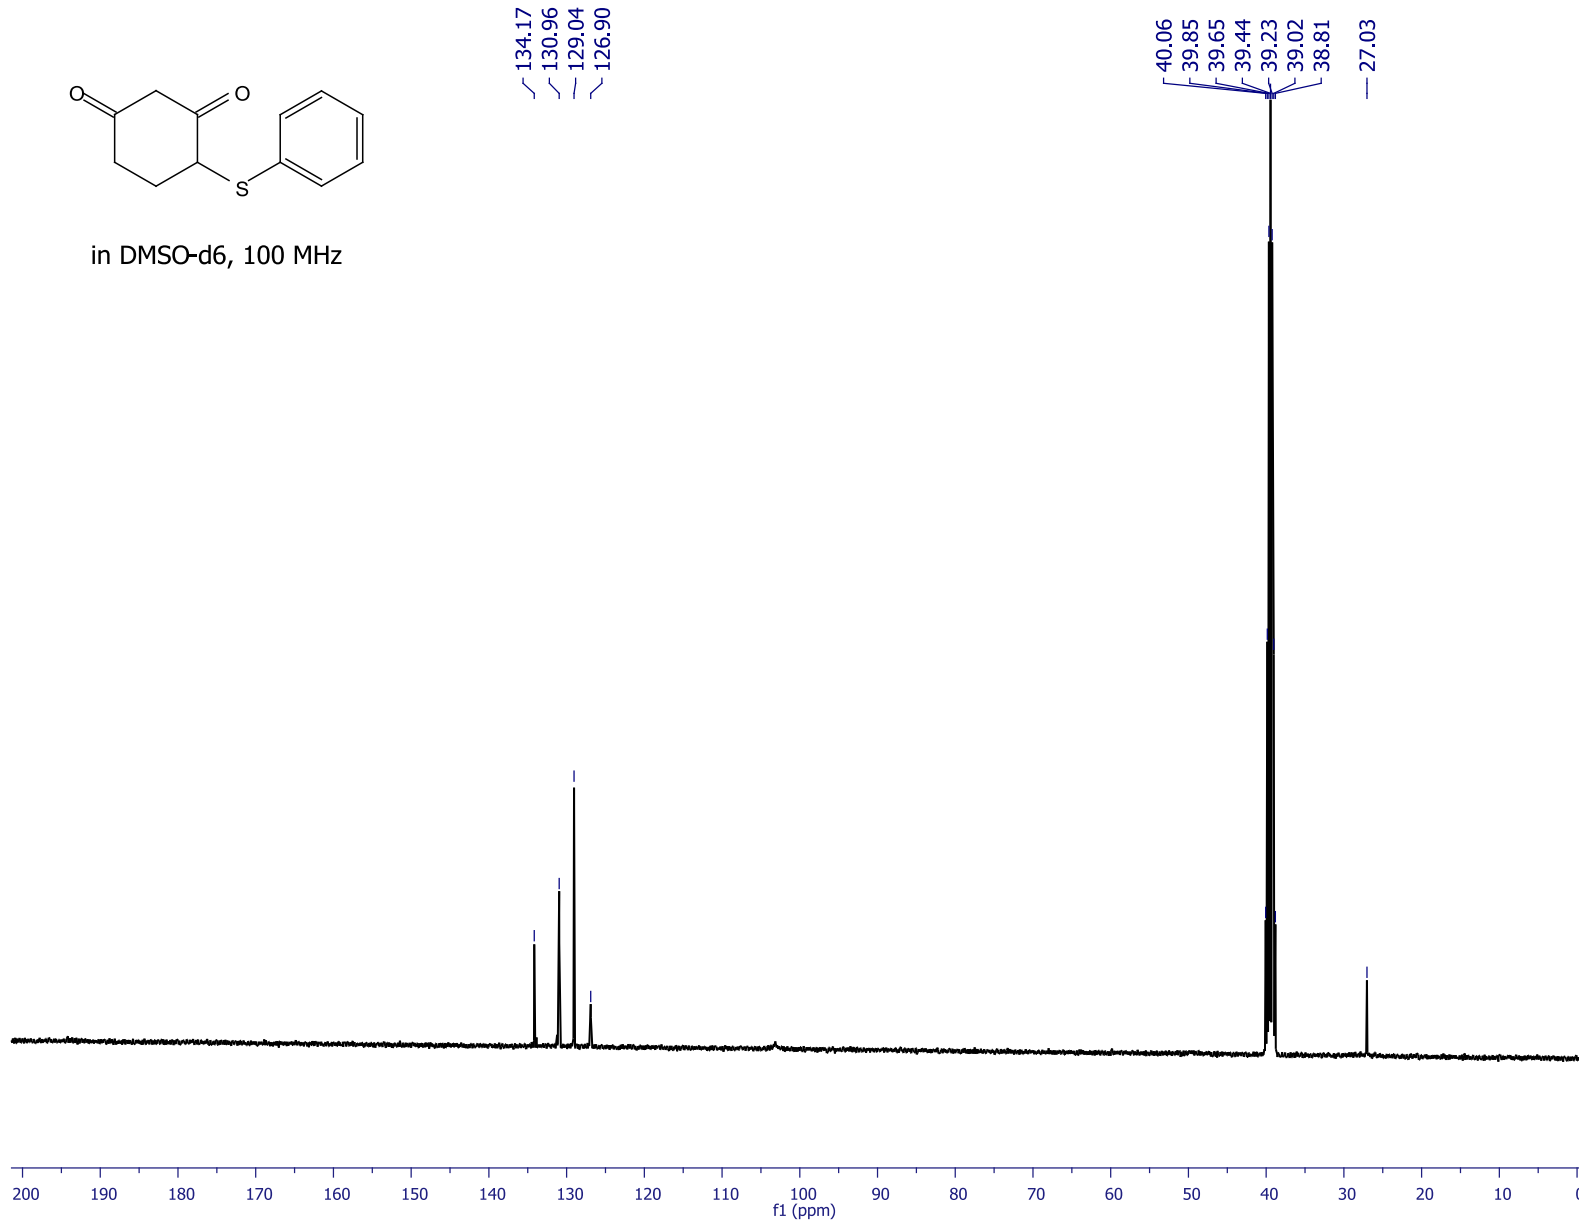

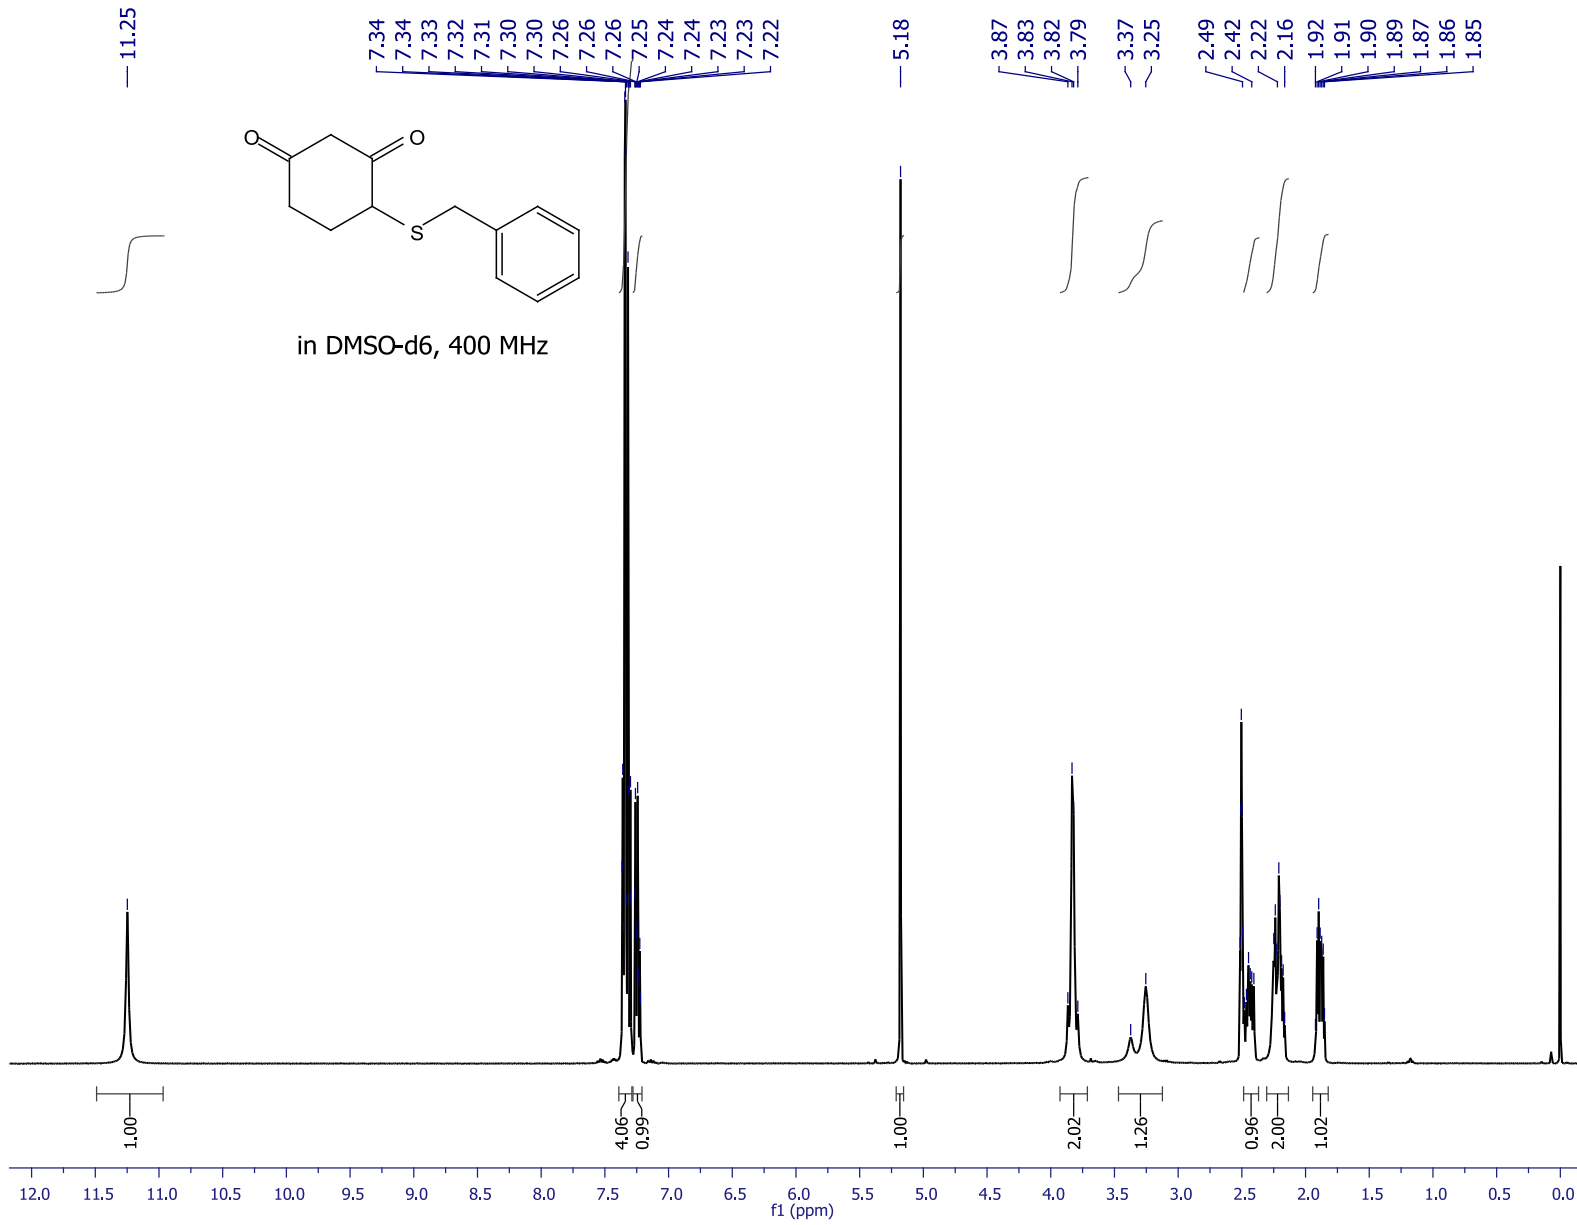



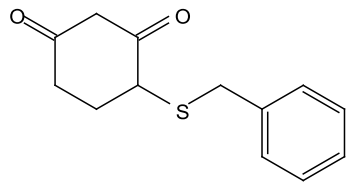

in DMSO-d6, 100 MHz

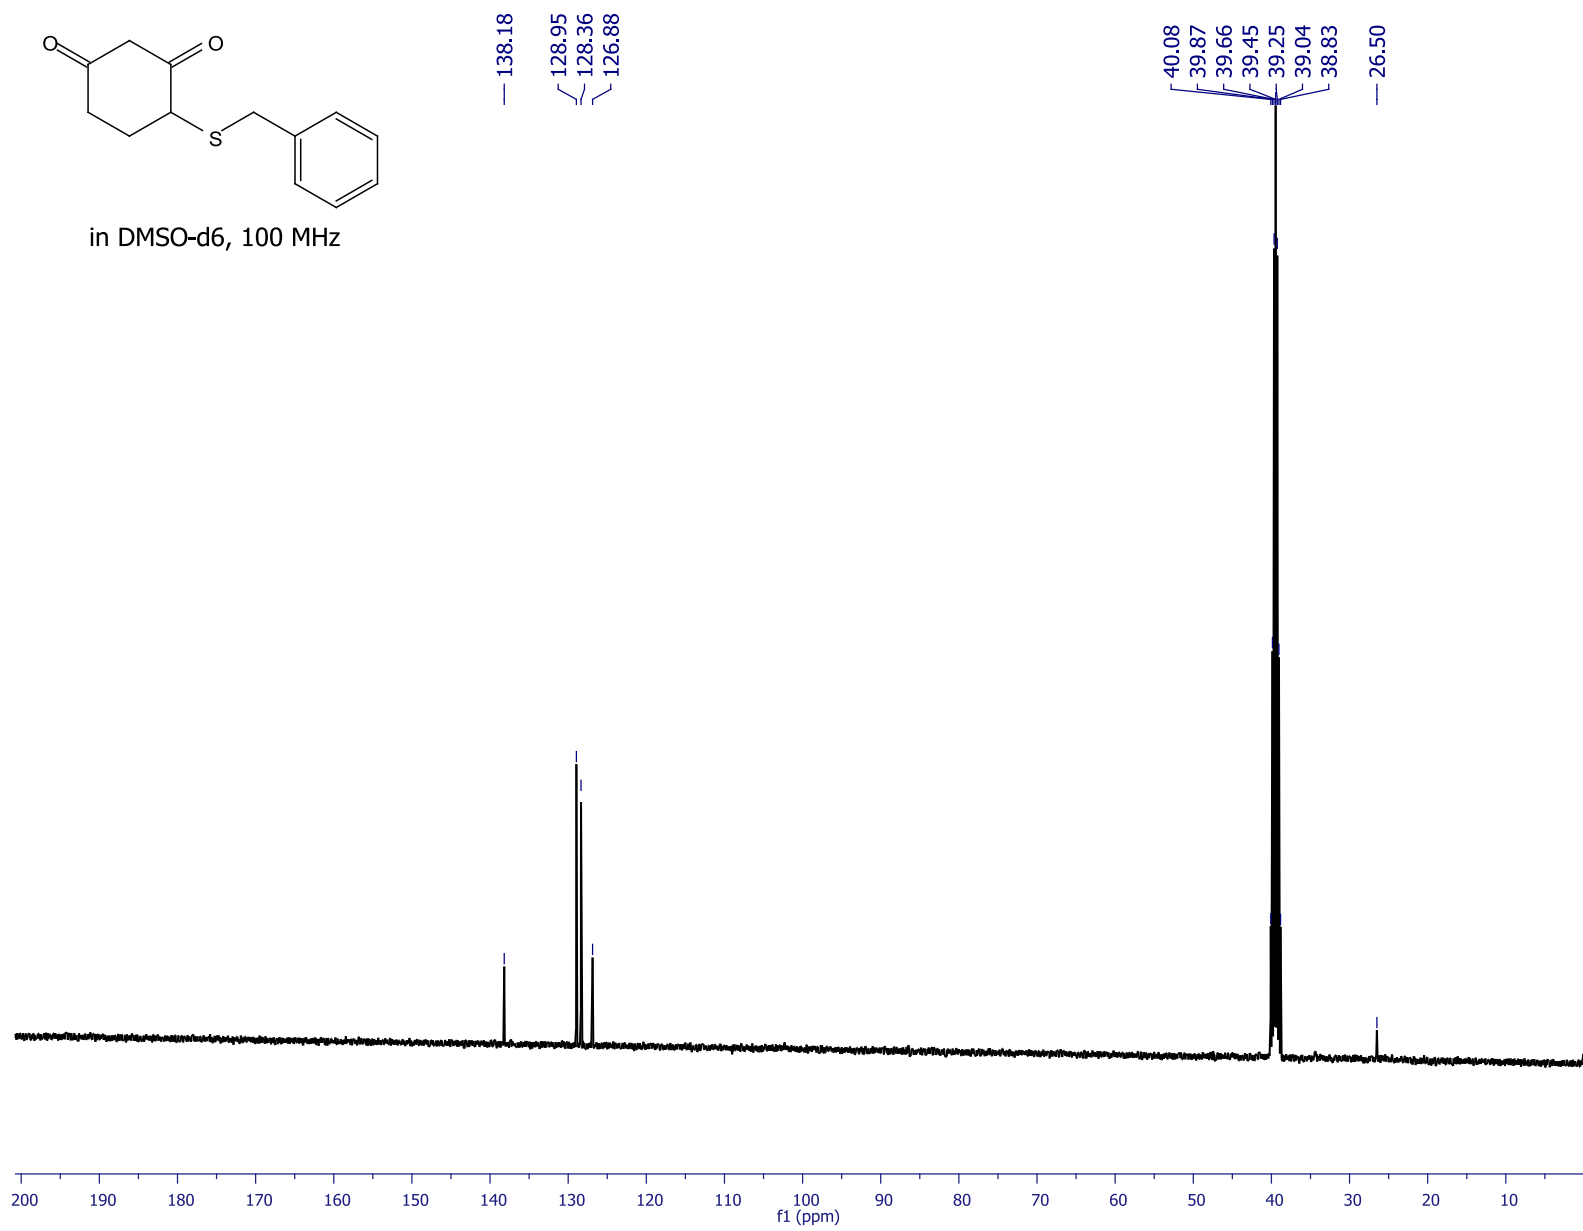

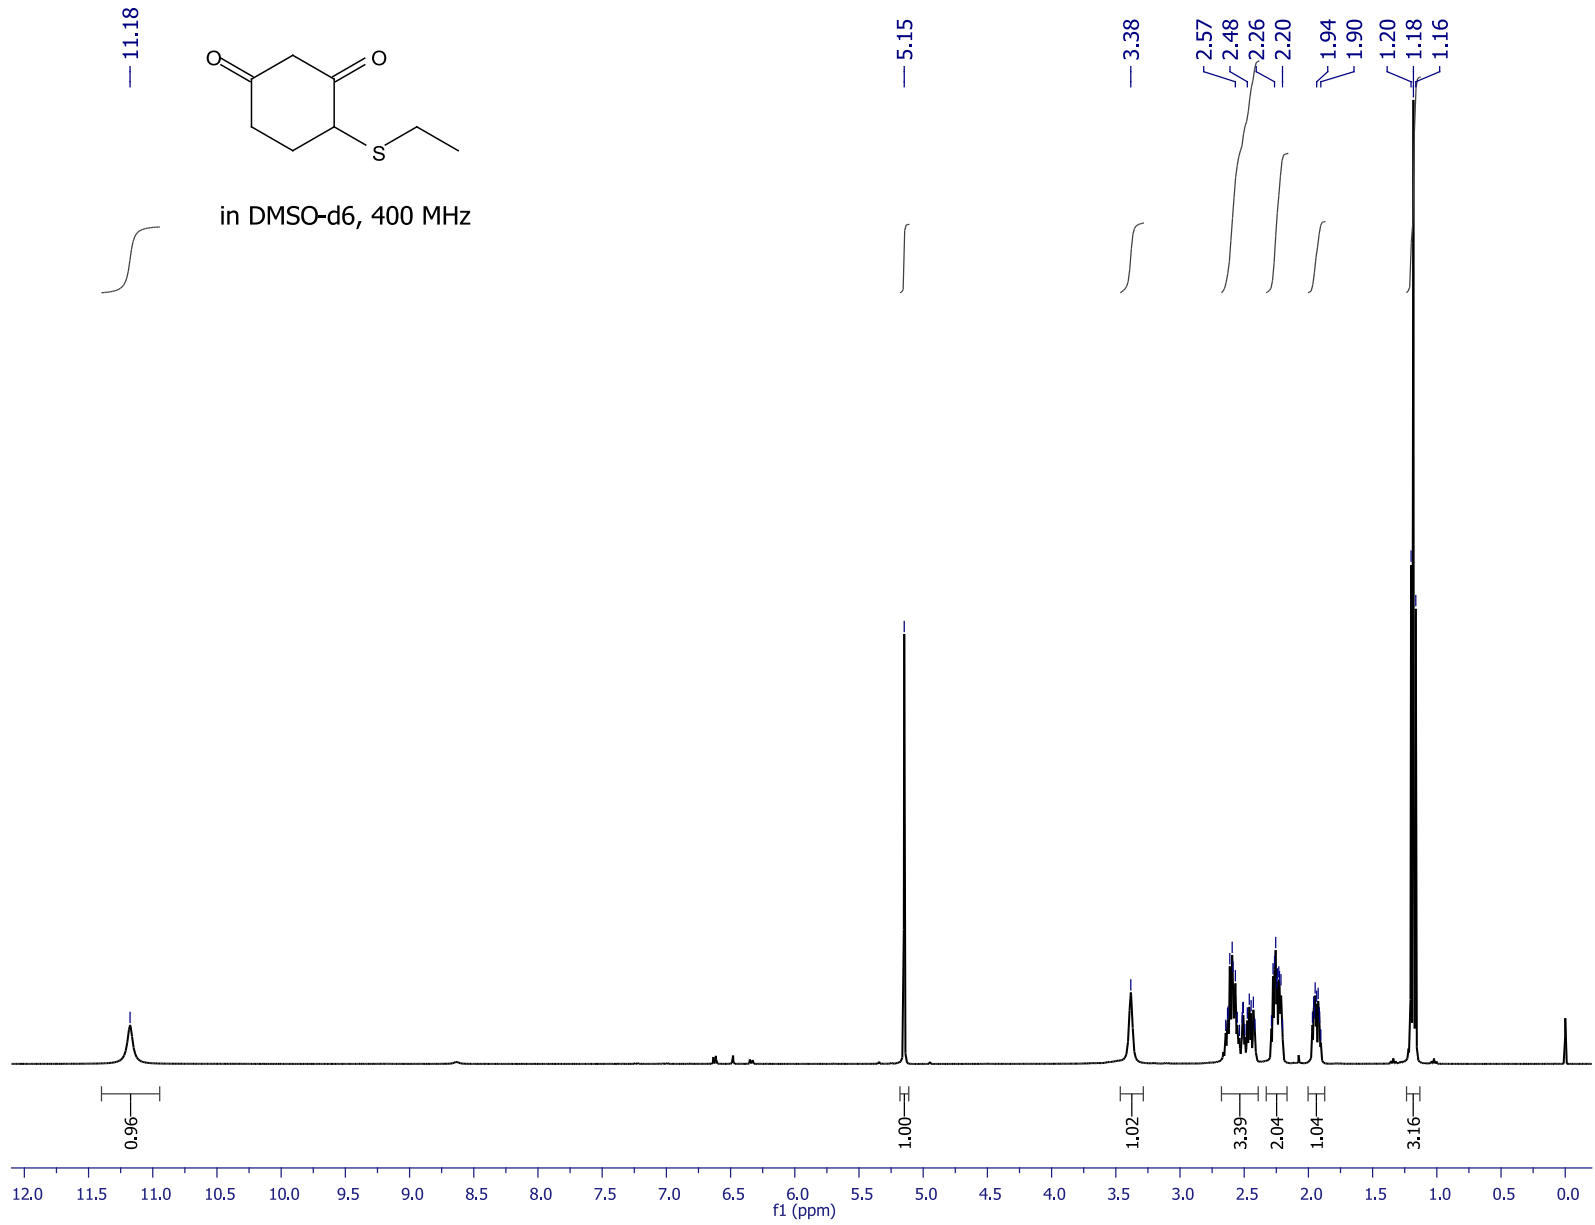

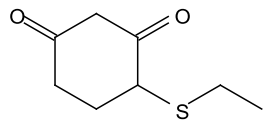

in DMSO-d6, 100 MHz

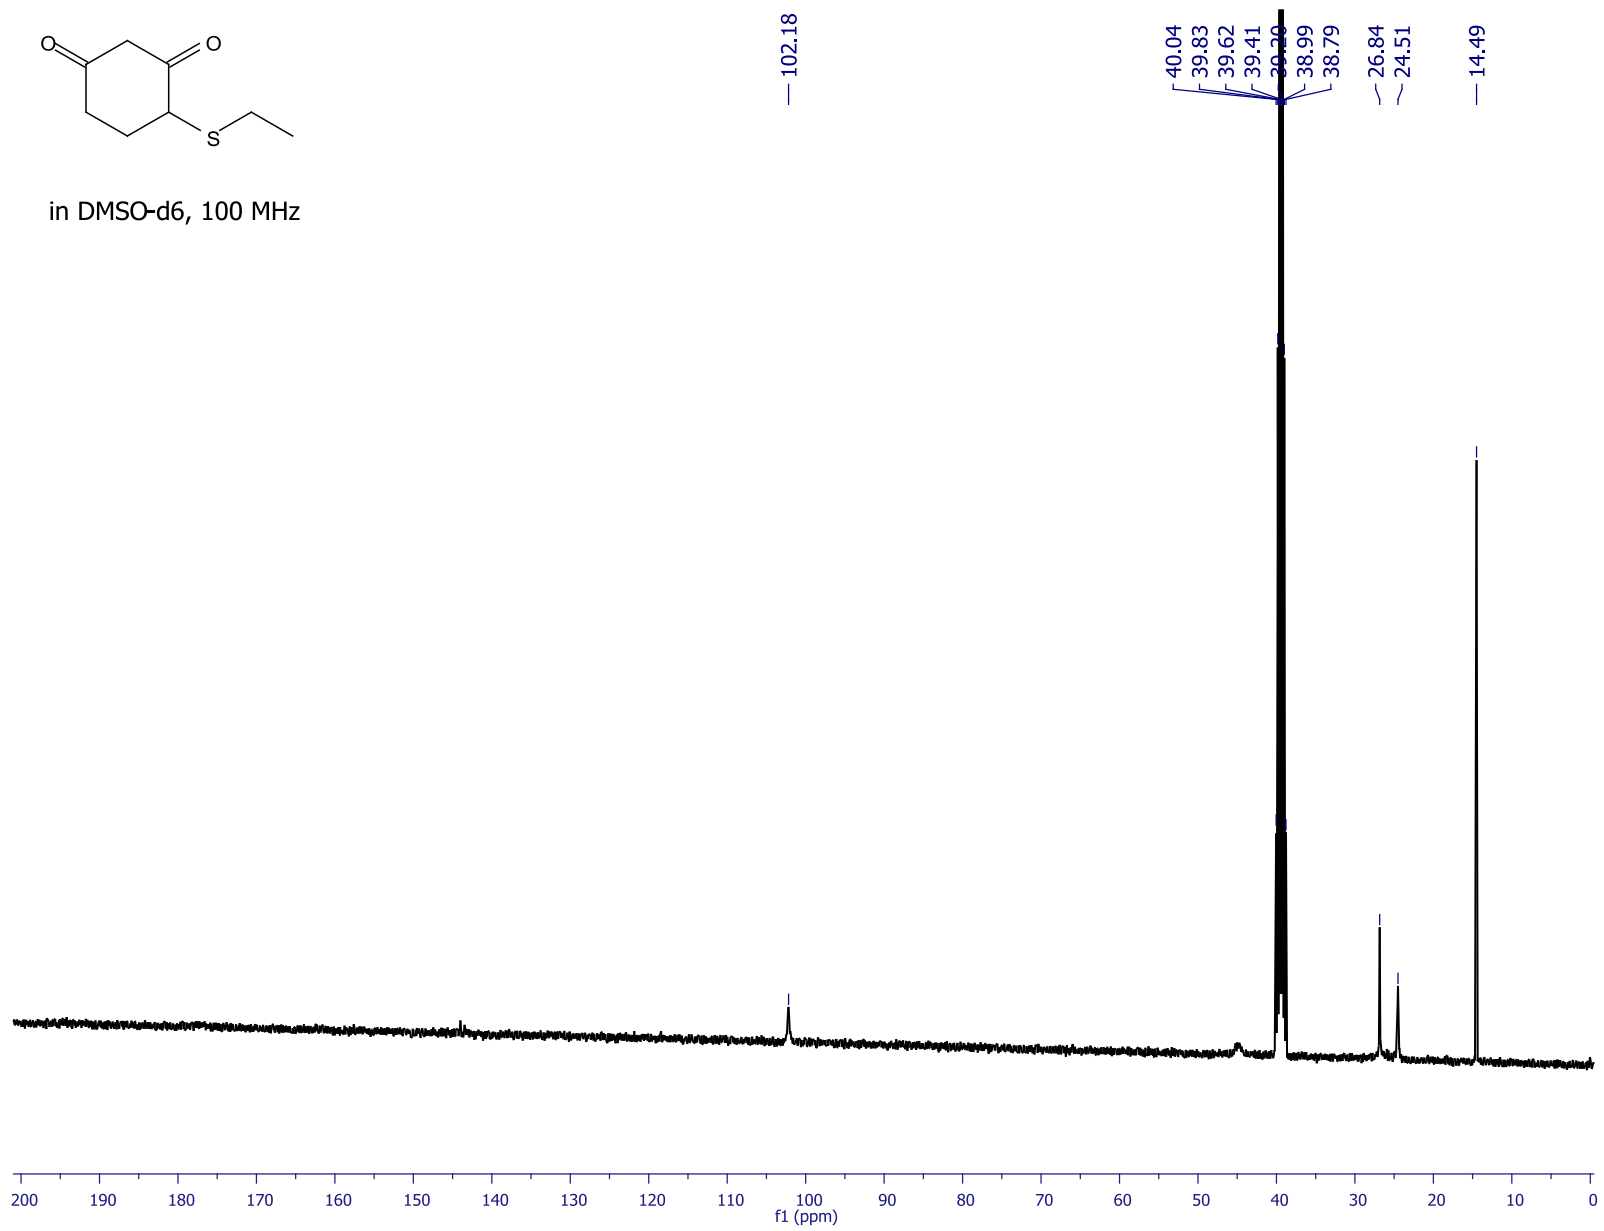

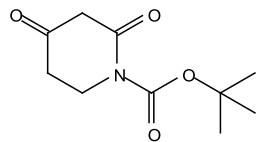

in CDCl<sub>3</sub>, 400 MHz

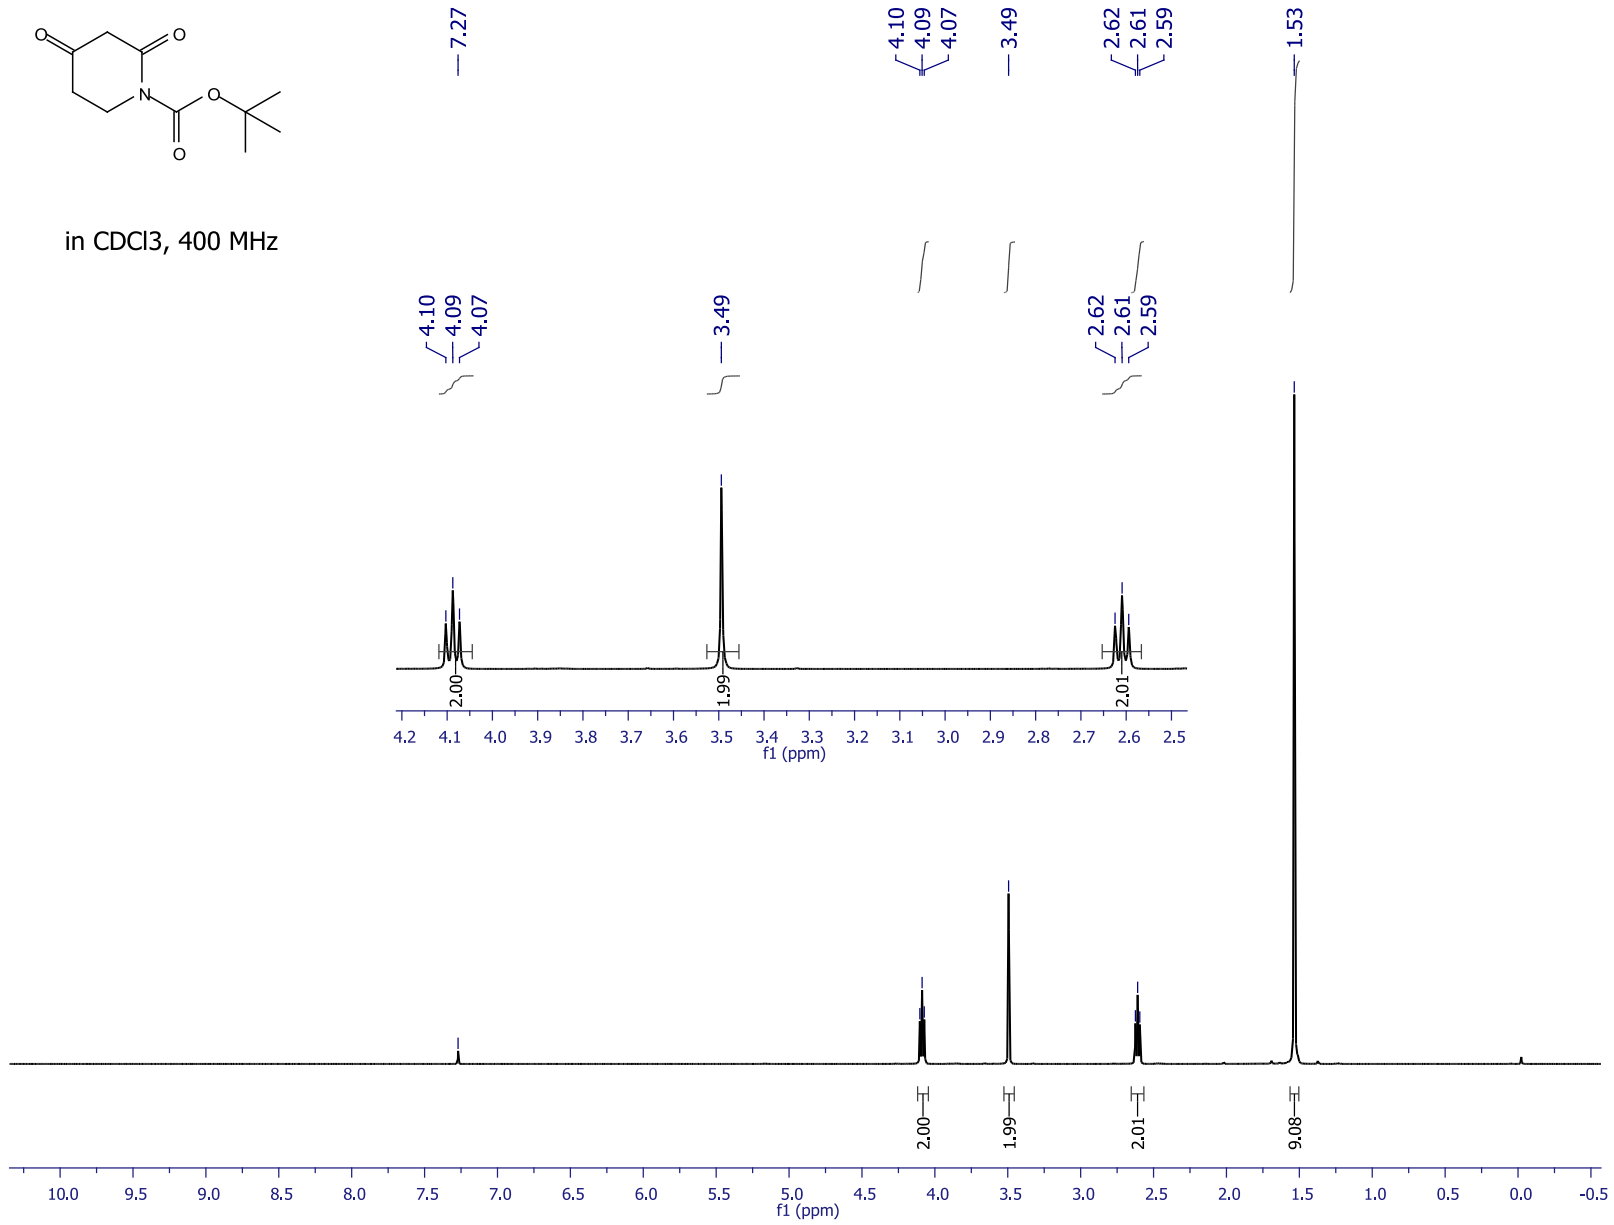

— 202.42

— 165.60

— 151.54

— 84.51

77.66

77.34

77.02

— 52.47

— 40.96

— 38.54

— 28.23

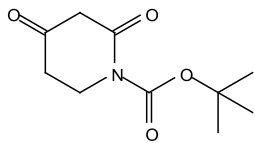

in CDCl<sub>3</sub>, 100 MHz

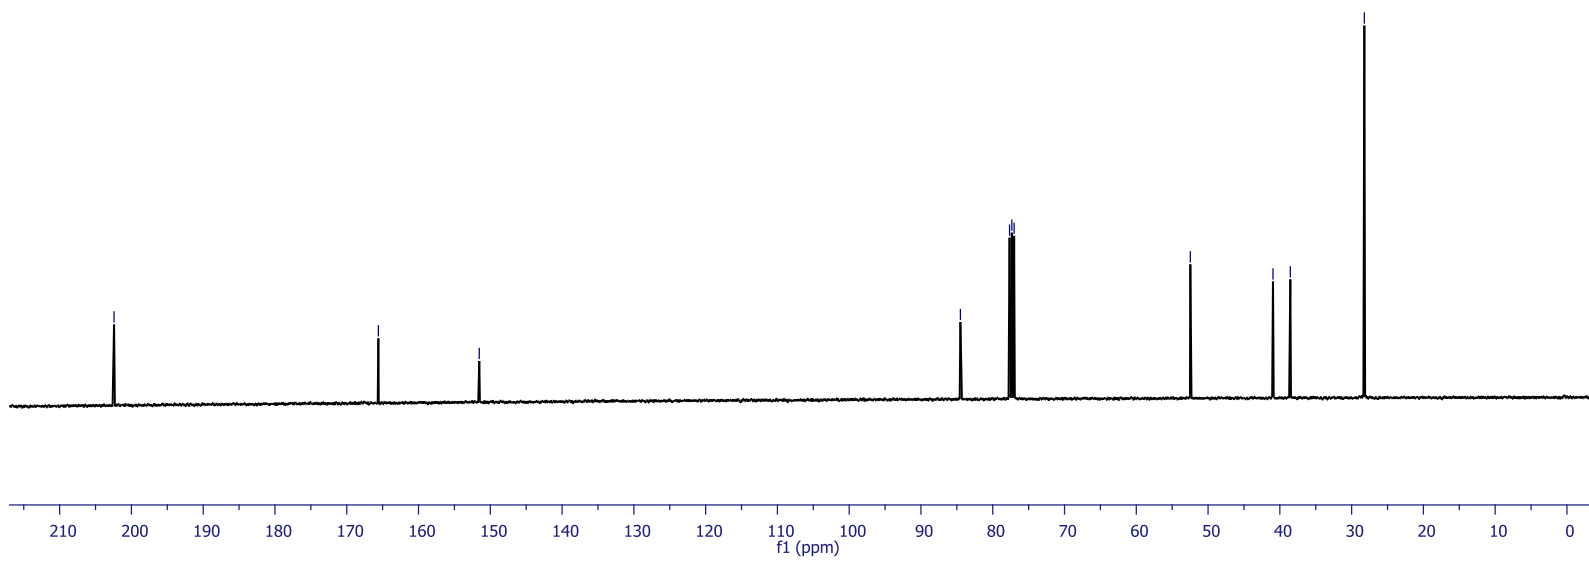

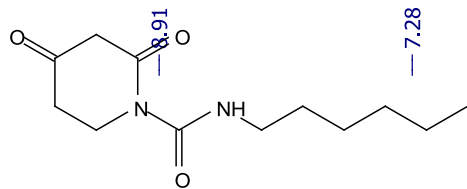

IN CDCl<sub>3</sub>, 400 MHz

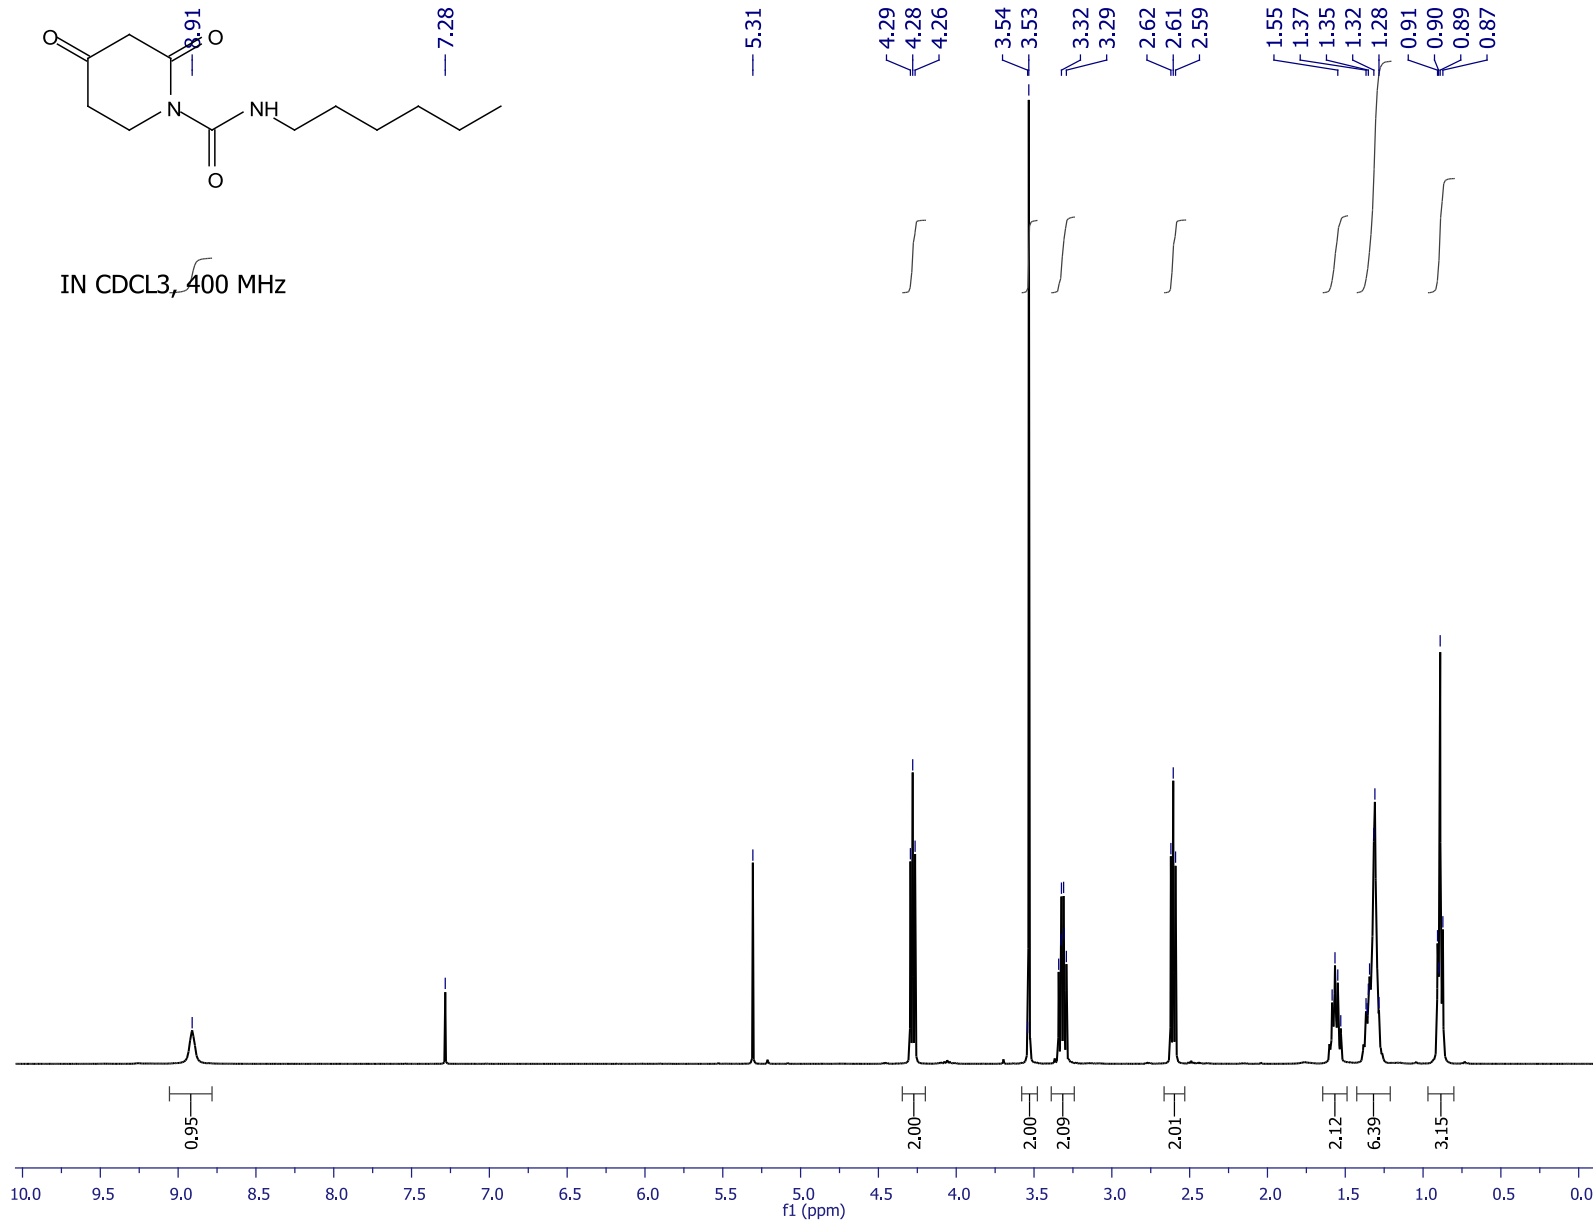

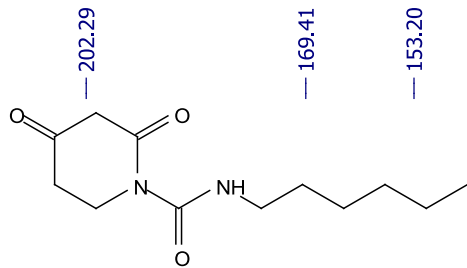

77.37  
77.05  
76.74

51.59

40.71

38.37

38.08

31.42

26.57

22.52

14.00

IN CDCl<sub>3</sub>, 100 MHz

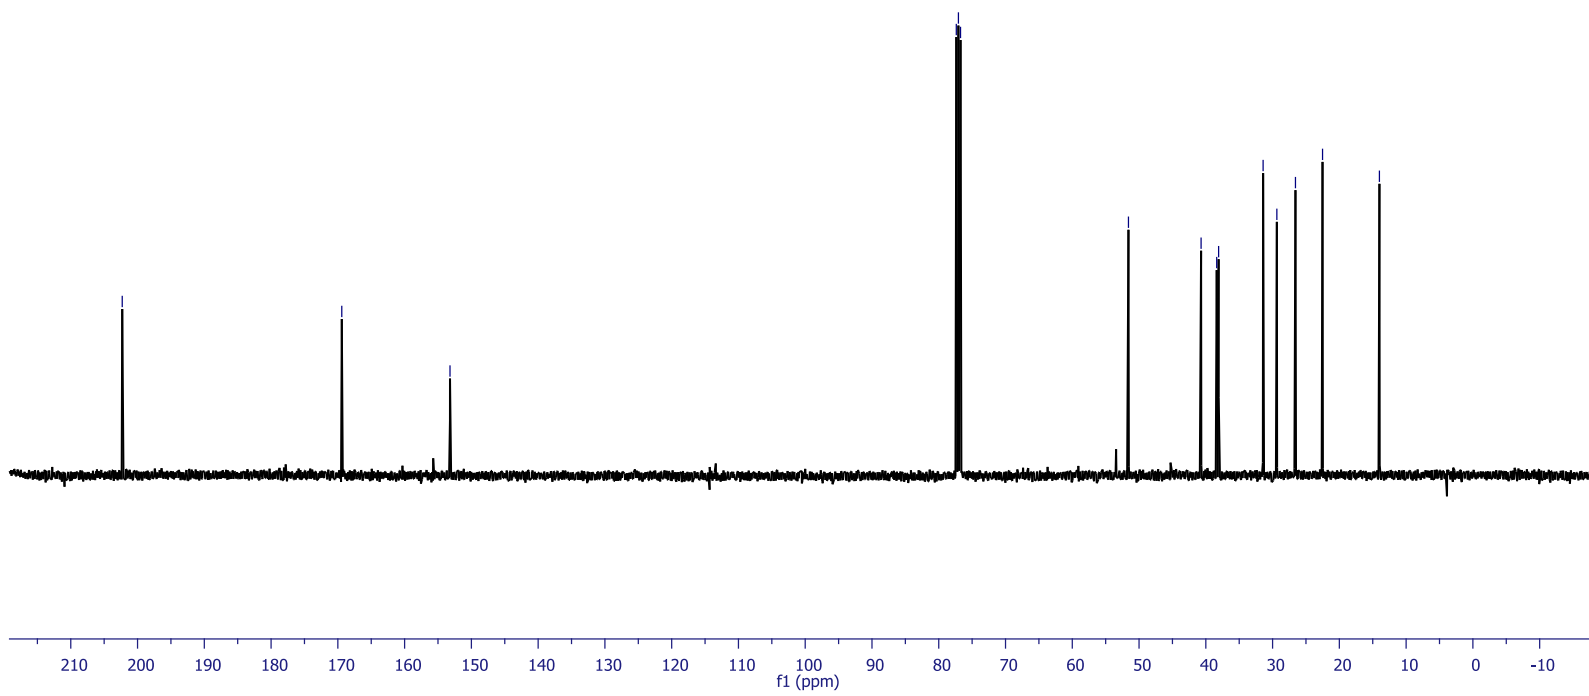

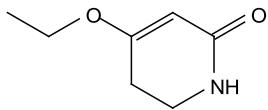

<sup>1</sup>HNMR in CDCl<sub>3</sub>, 400 MHz

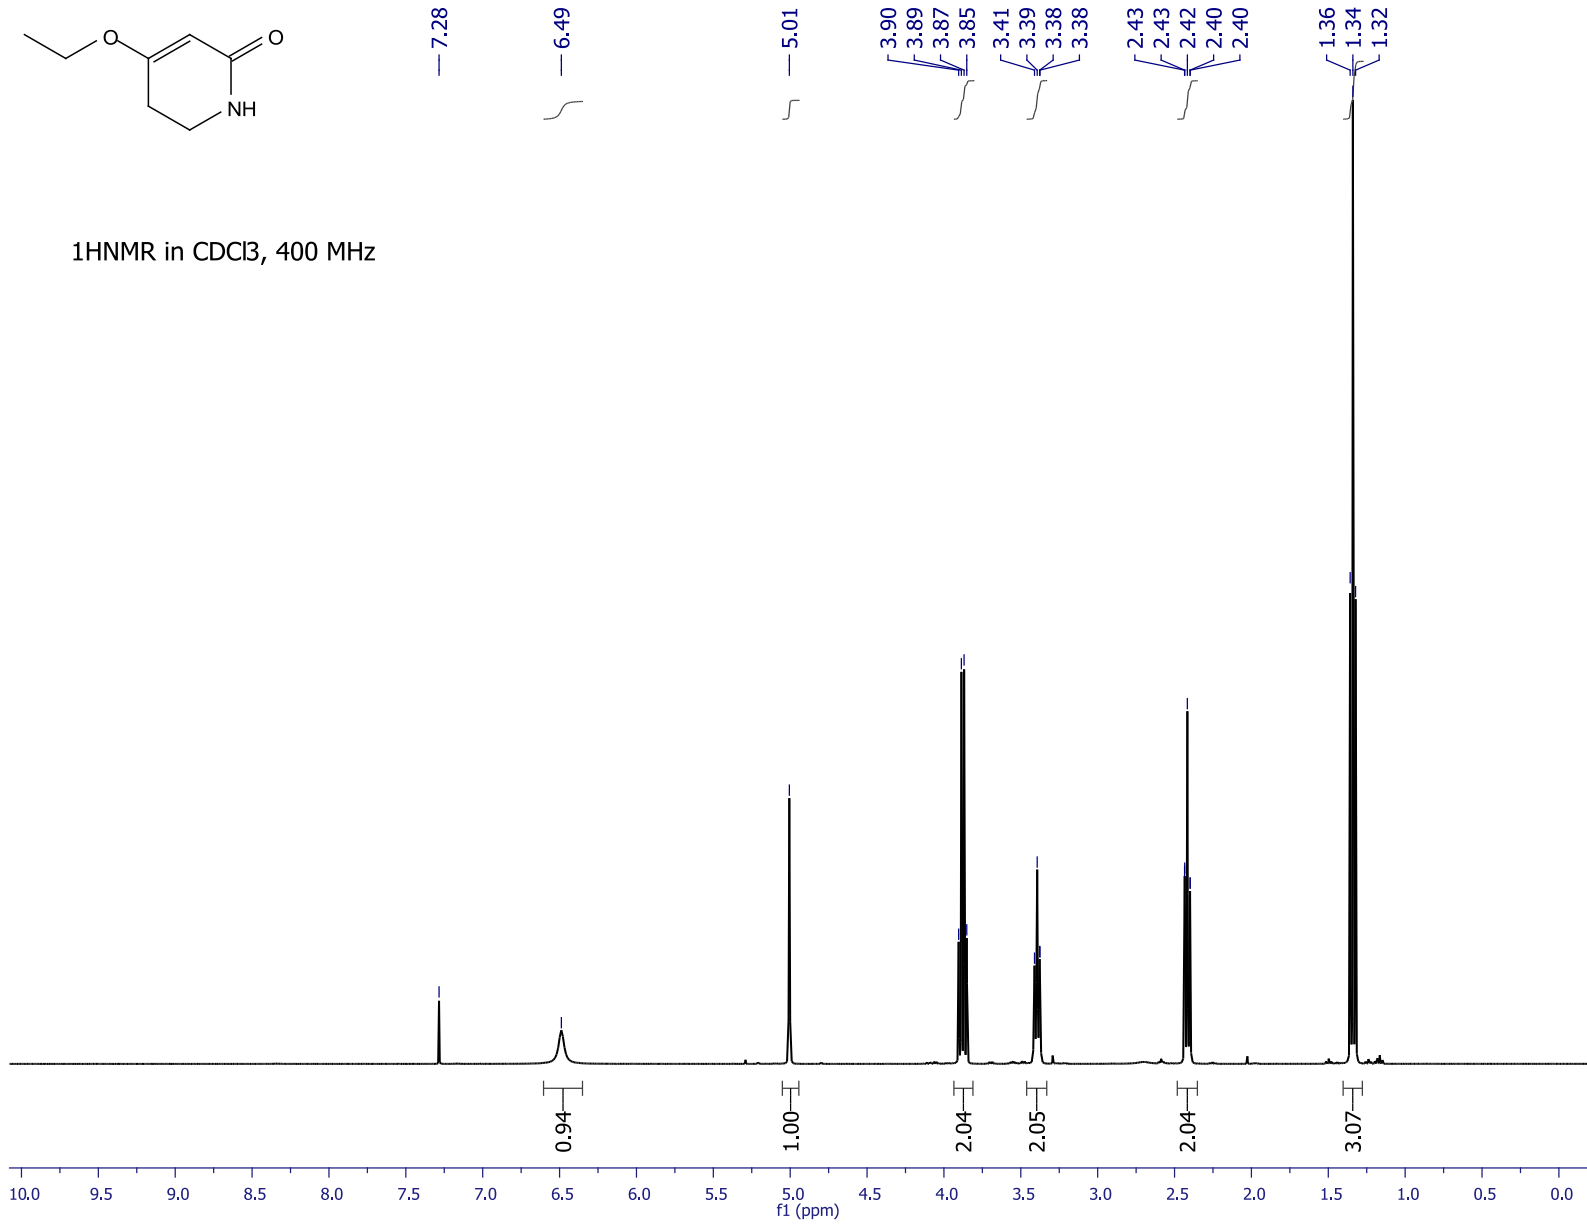



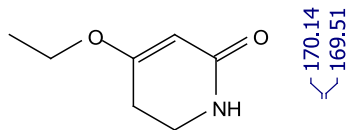

93.85

77.41

77.09

76.77

63.98

38.59

27.91

14.10

13-CNMR in CDCl<sub>3</sub>, 100 MHz

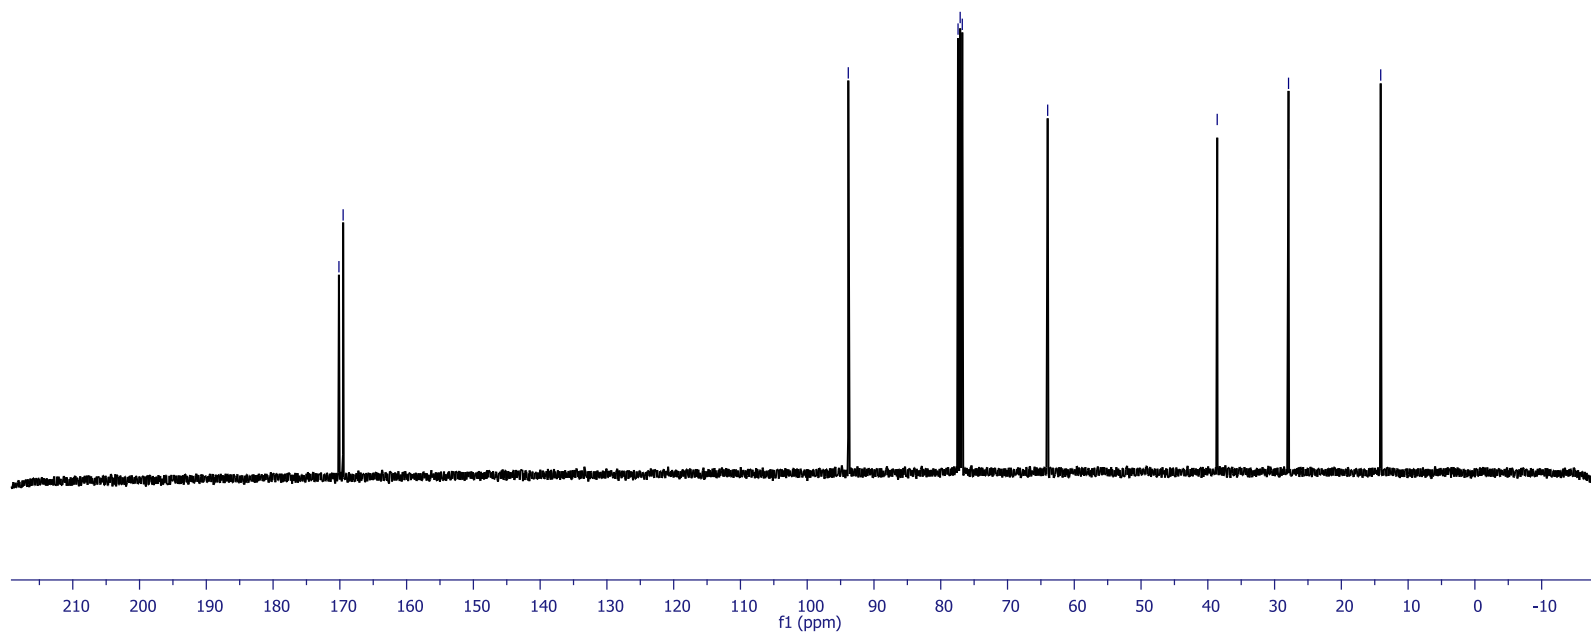

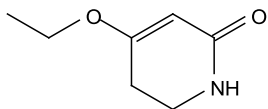

<sup>1</sup>H-NMR in DMSO-d<sub>6</sub>, 400 MHz

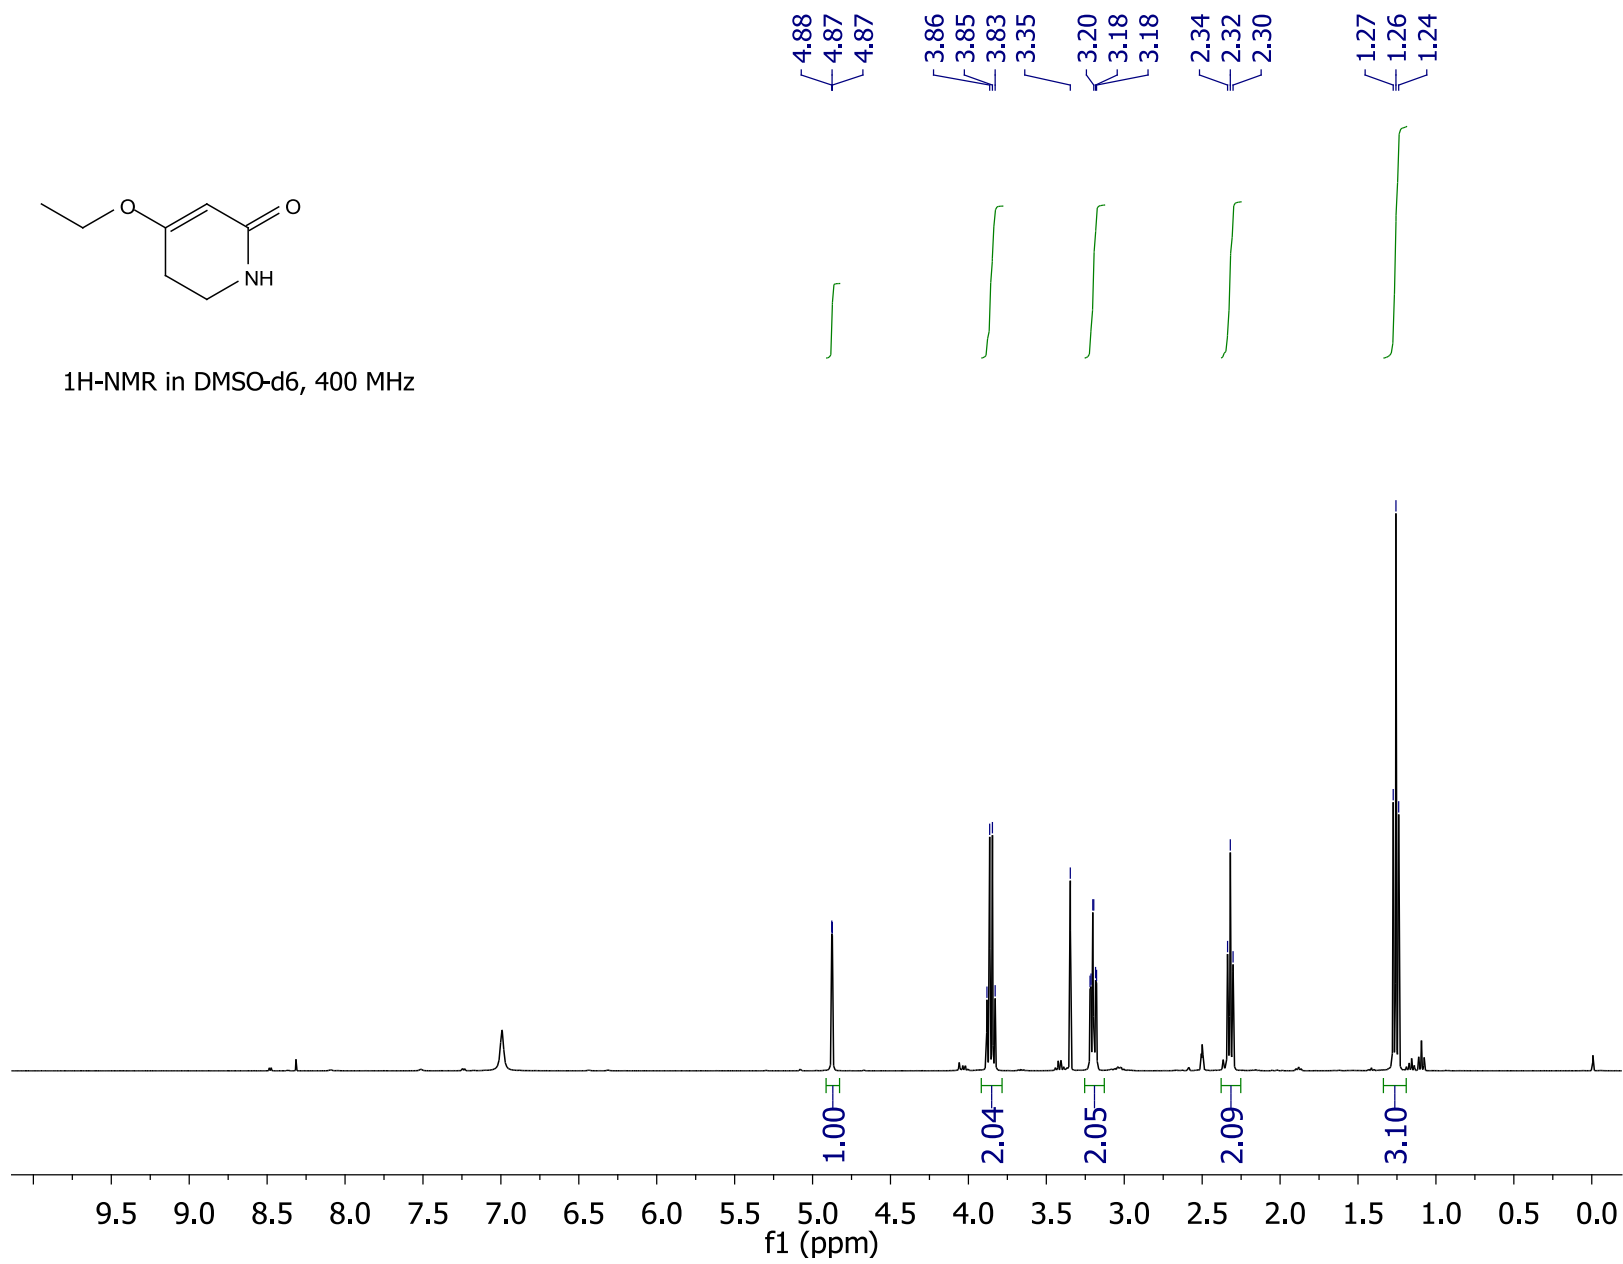

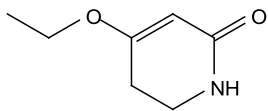

168.48  
167.90

94.07

63.49

39.45  
39.24  
39.04  
38.83  
37.75

27.41

13.96

<sup>13</sup>C-NMR in DMSO-d<sub>6</sub>, 100 MHz

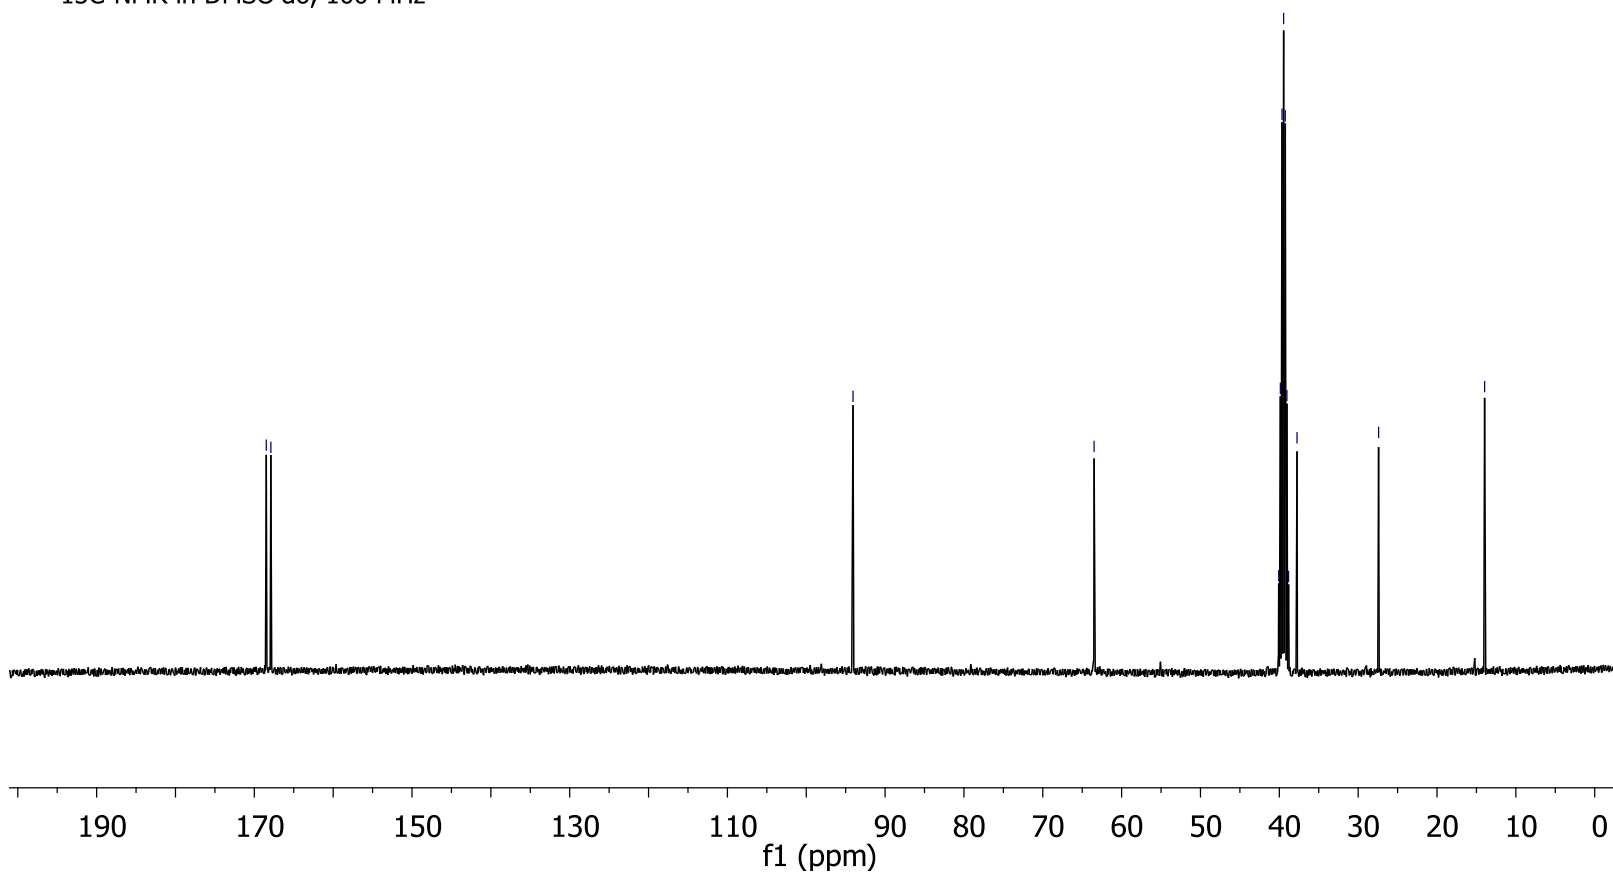

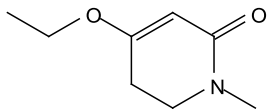

<sup>1</sup>H-NMR in CDCl<sub>3</sub>, 400 MHz

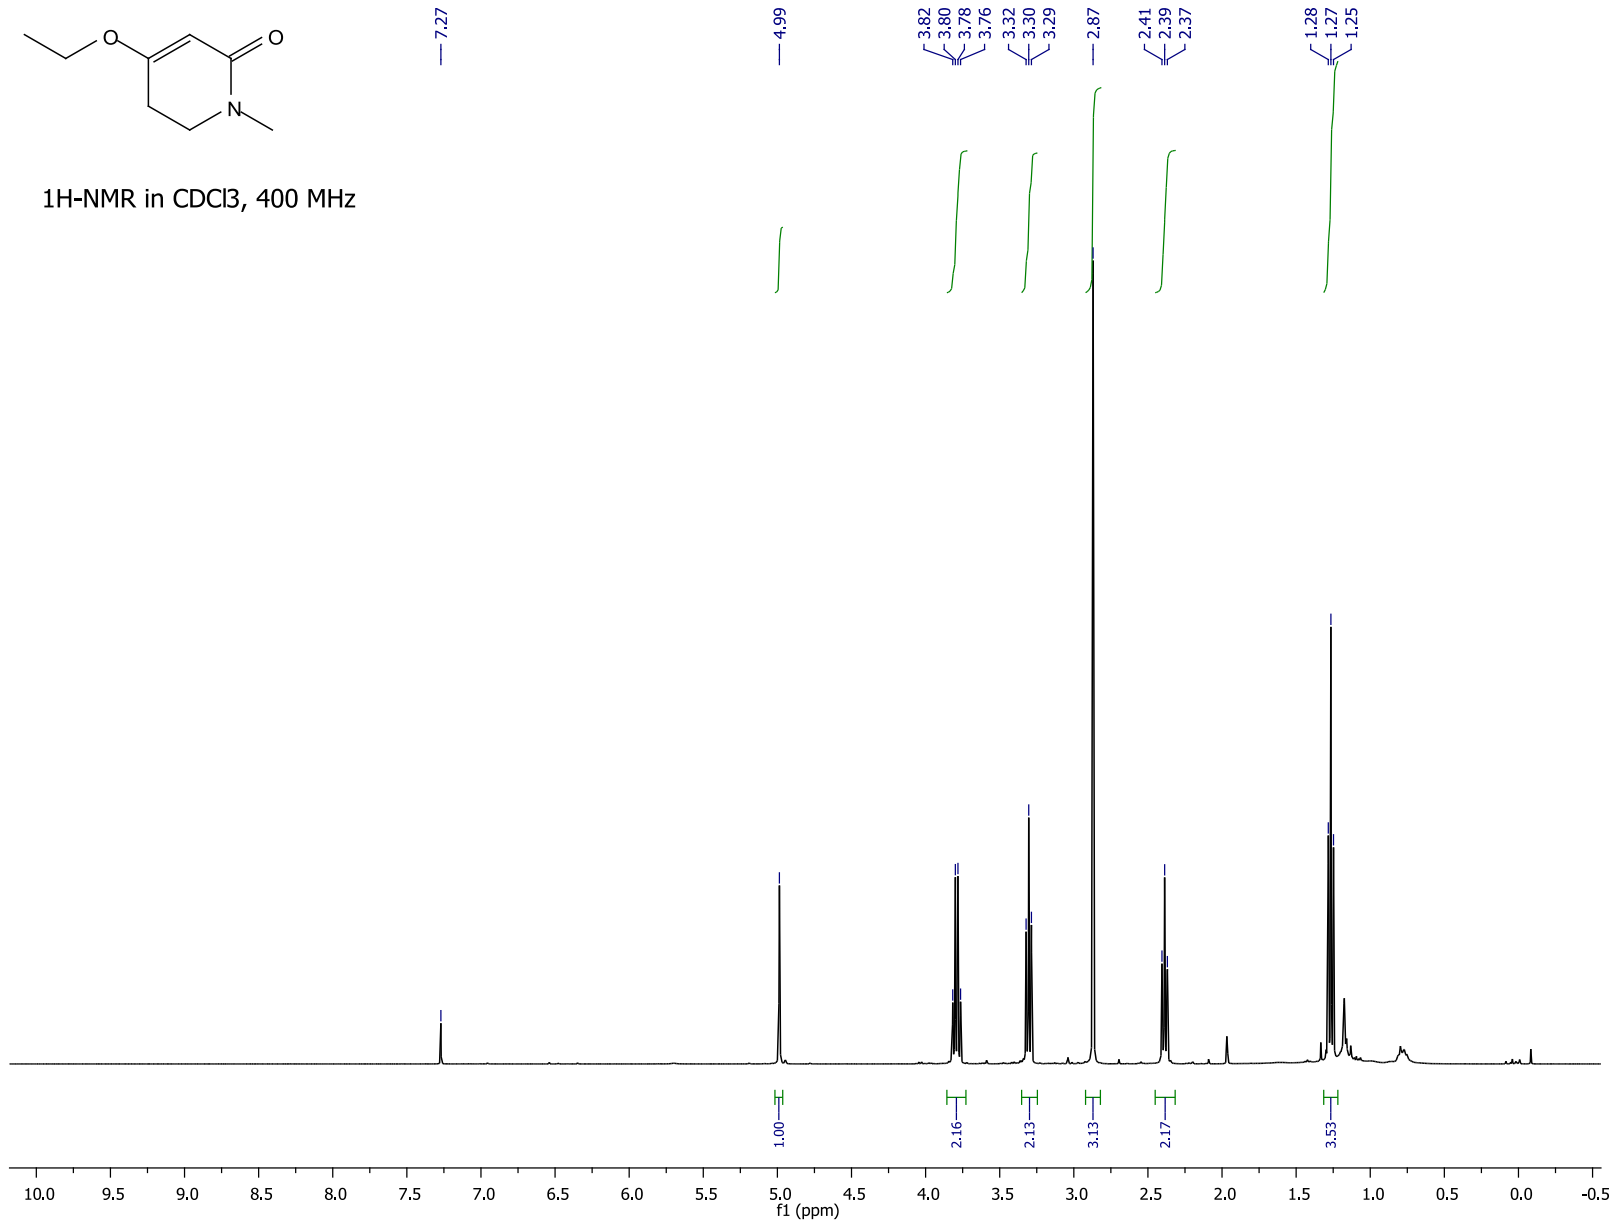

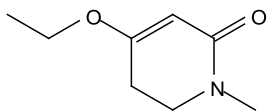

13-CNMR in CDCl<sub>3</sub>, 100 MHz

167.7  
167.5

94.5

77.5  
77.2  
76.8

63.9

46.5

33.9

27.8

14.1

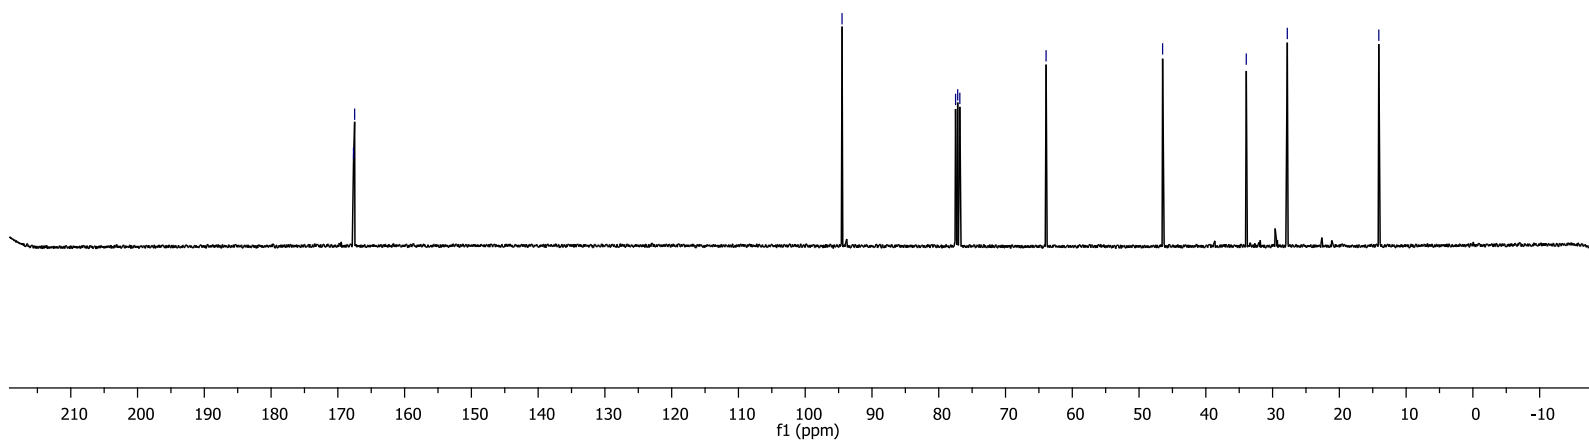

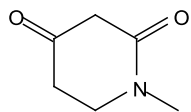

<sup>1</sup>H-NMR, in CDCl<sub>3</sub>, 400 MHz

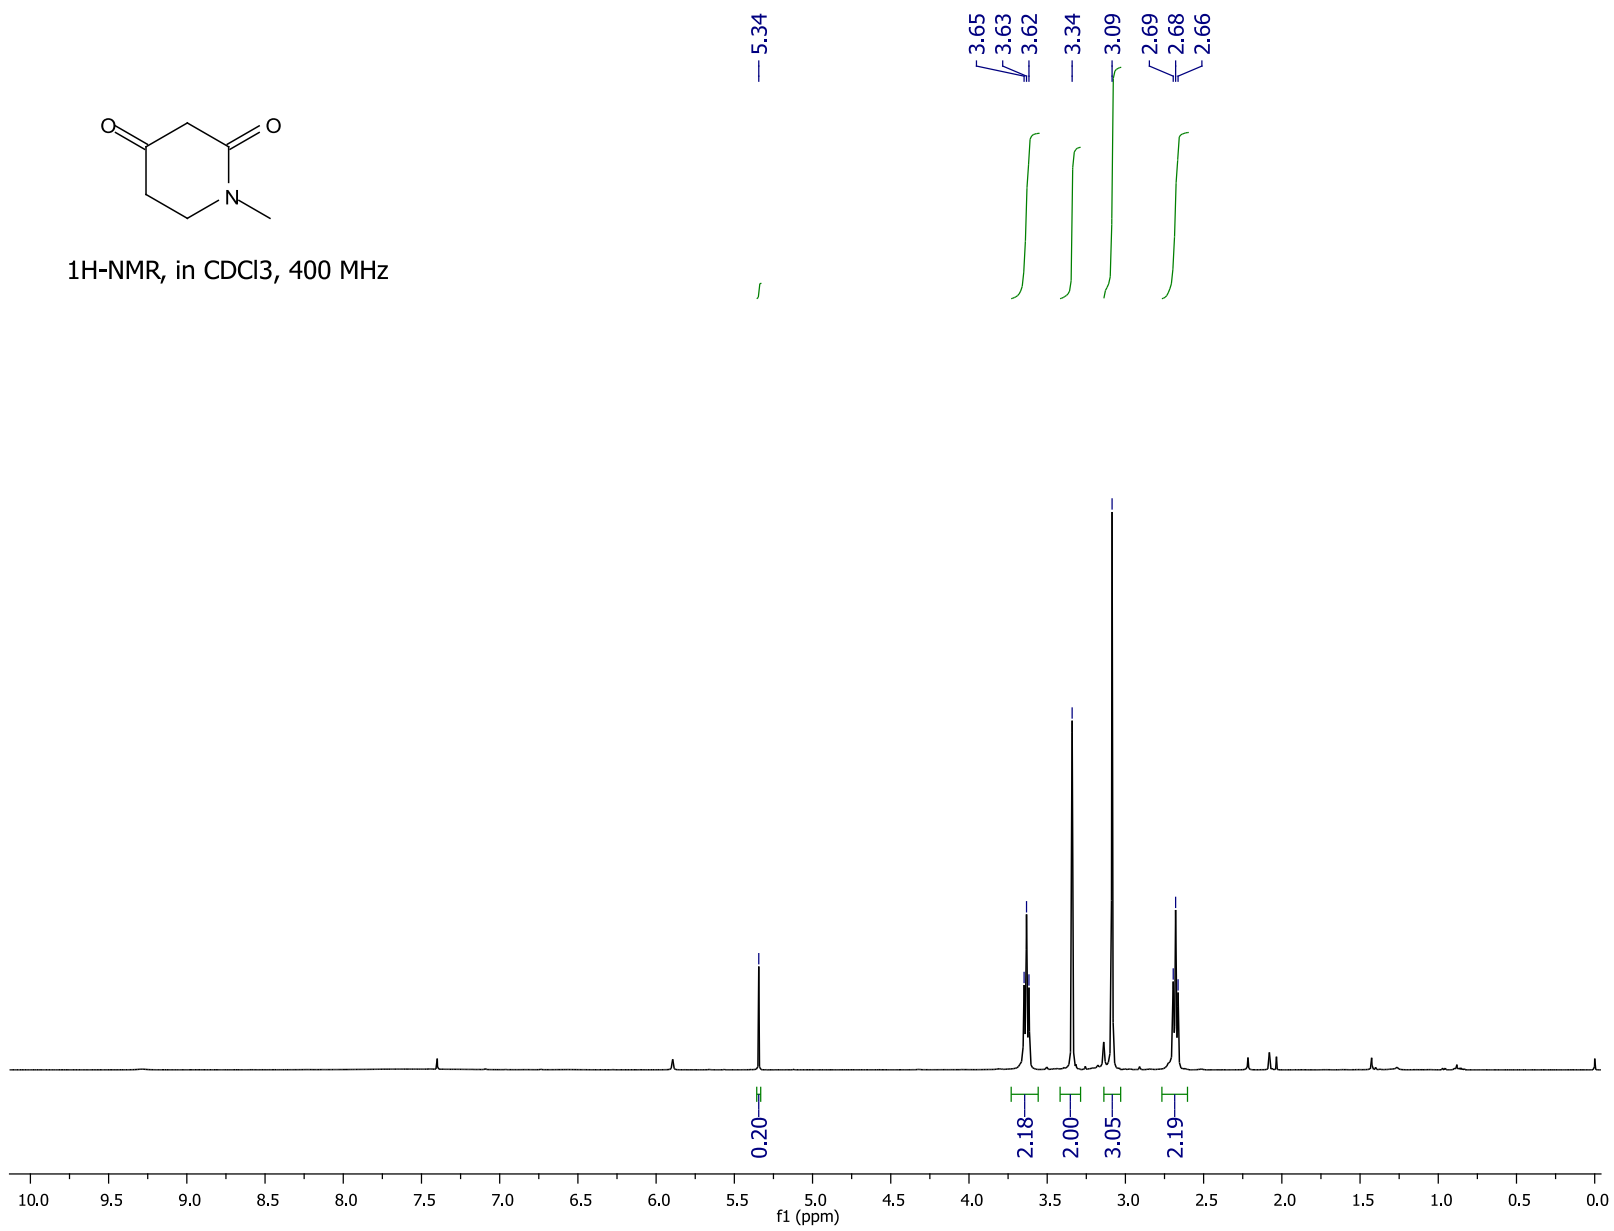

— 203.6  
— 166.5

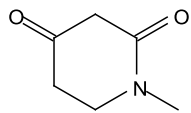

<sup>13</sup>C-NMR, in CDCl<sub>3</sub>, 100 MHz

77.6  
77.3  
77.0

48.4  
45.1  
38.3  
34.6

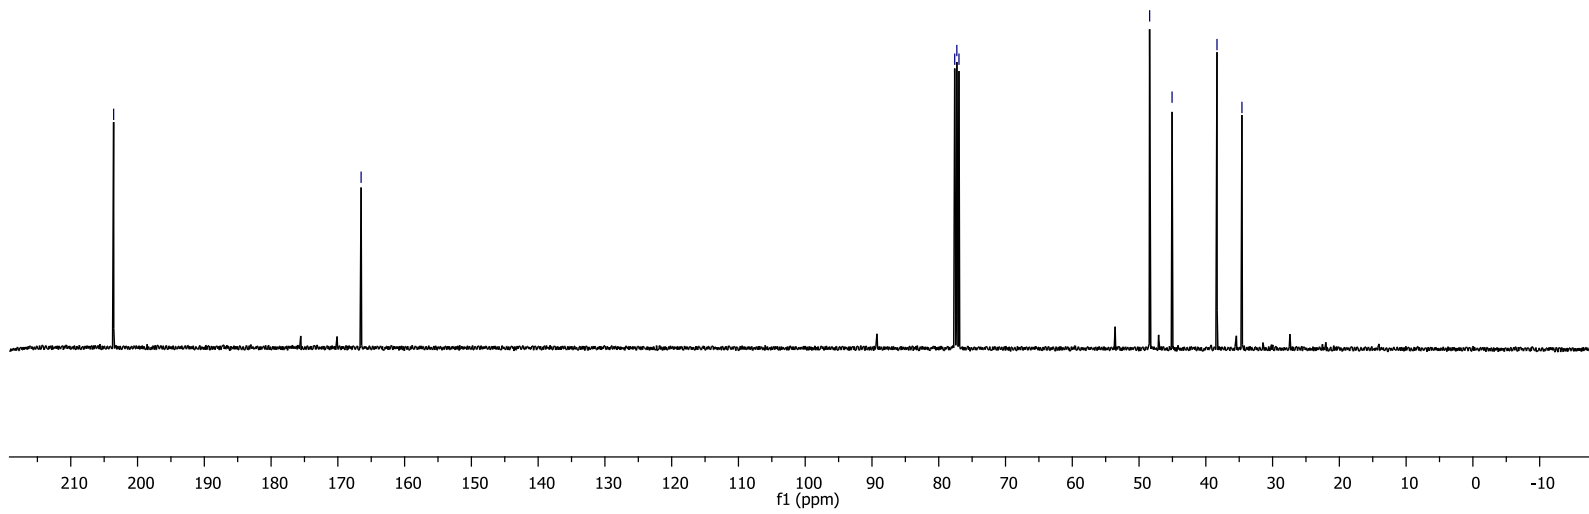

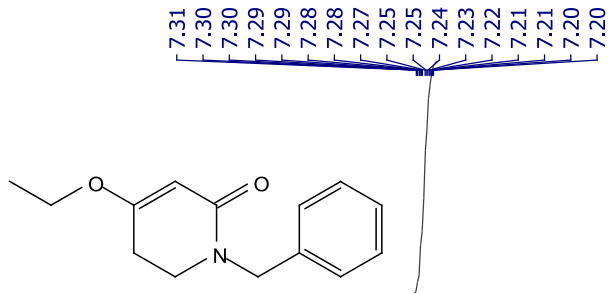

in CDCl<sub>3</sub>, 400 MHz

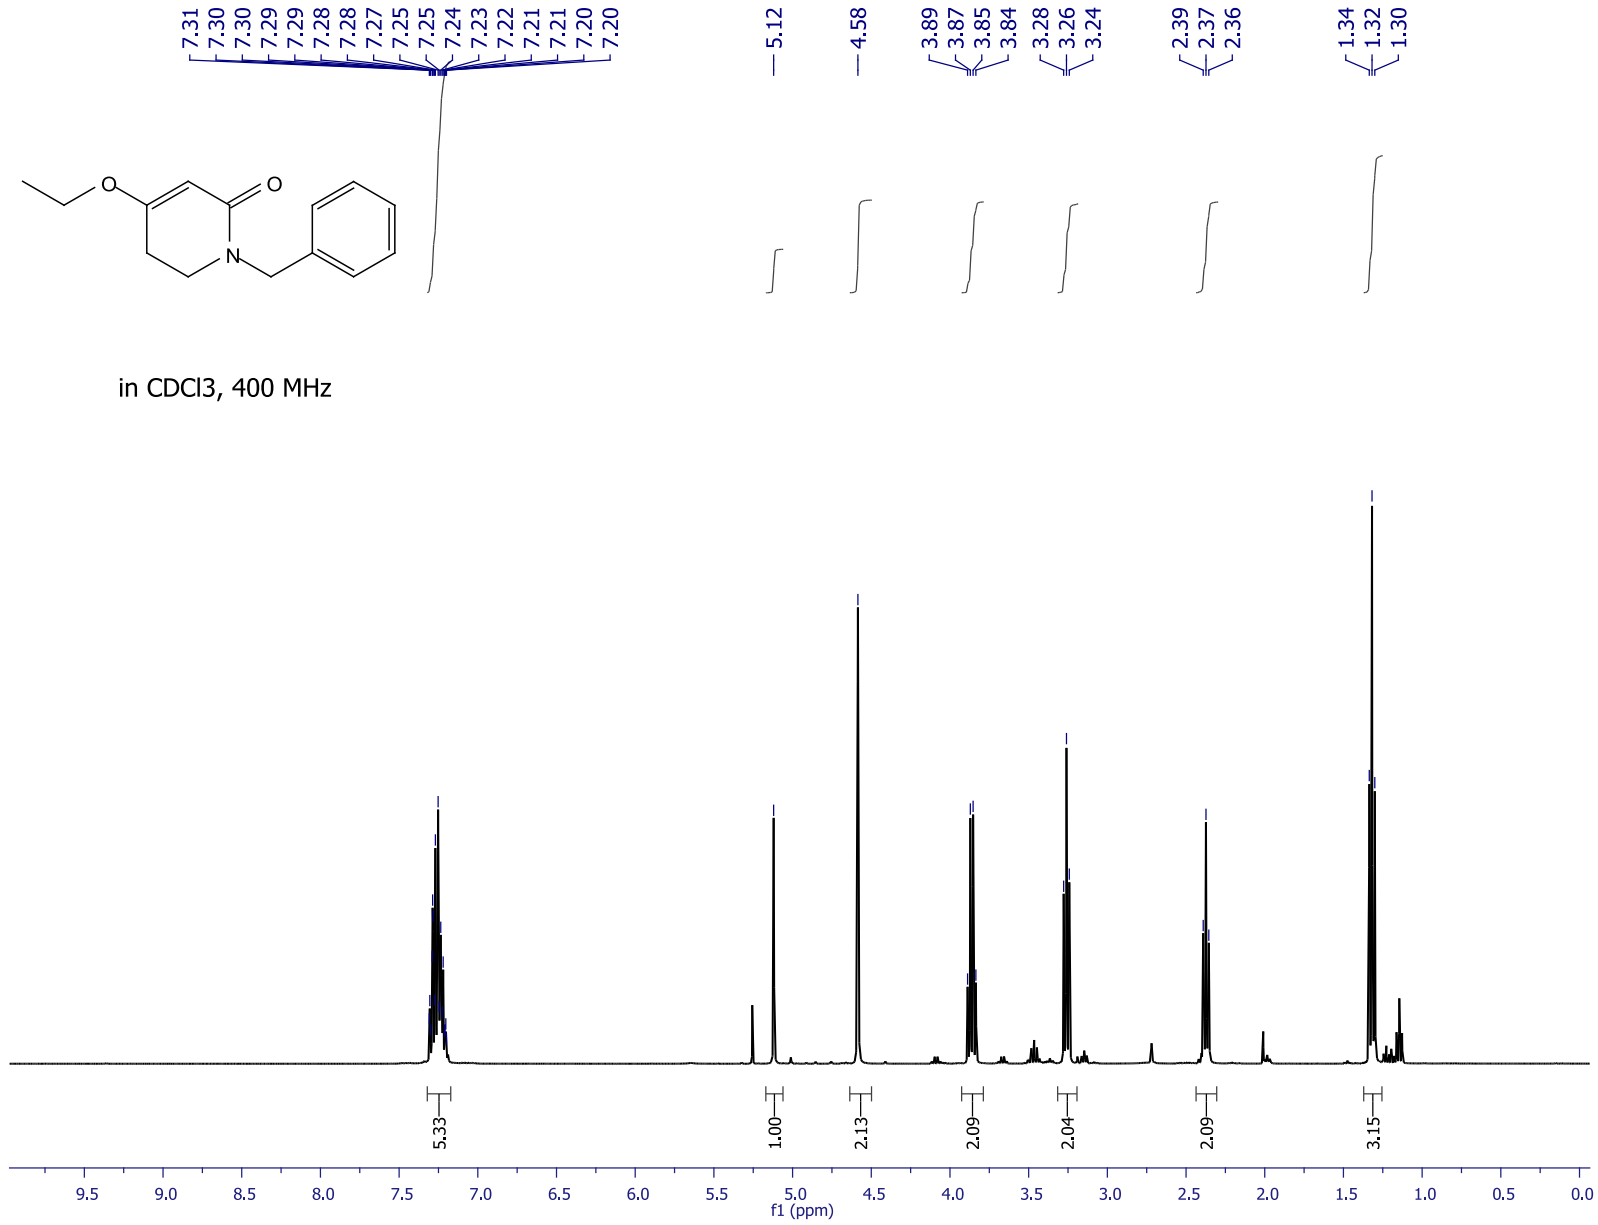



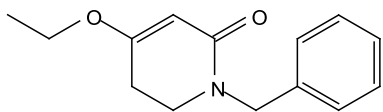

in CDCl<sub>3</sub>, 100 MHz

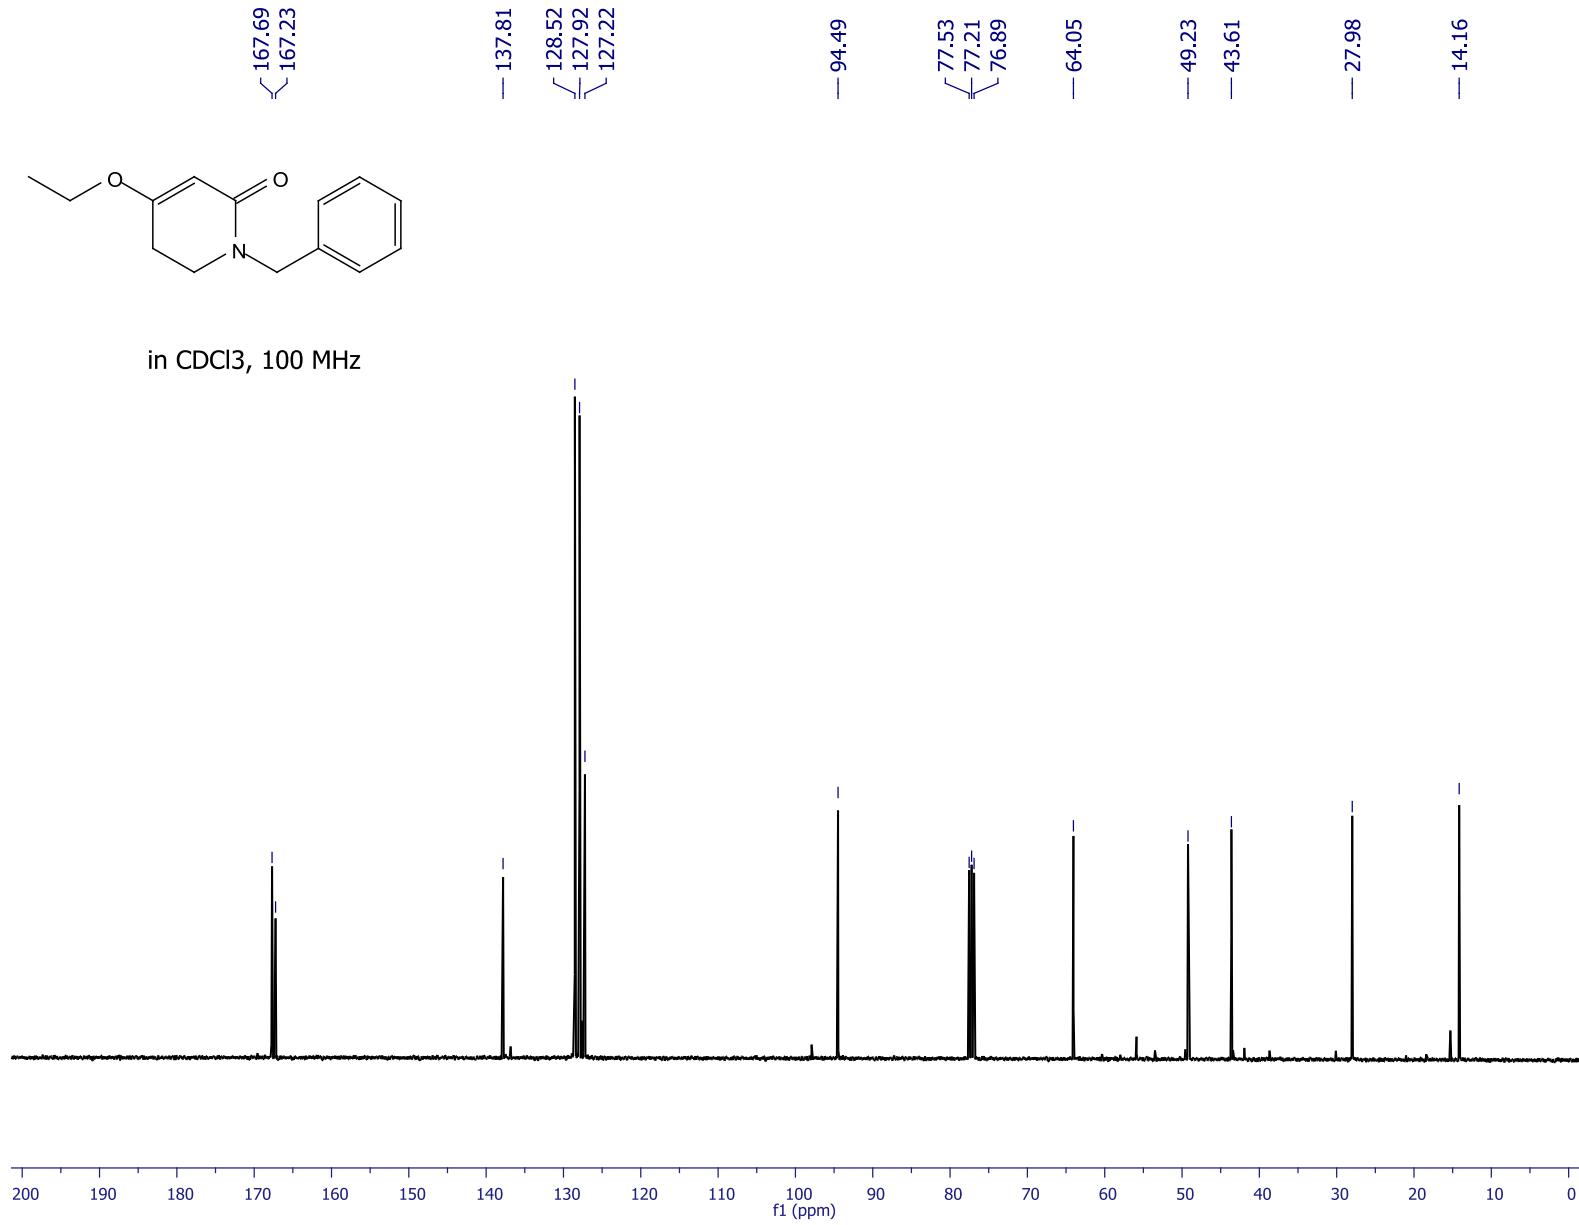

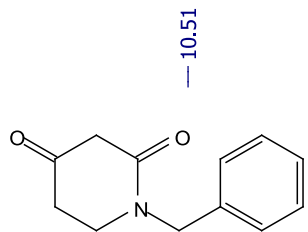

<sup>1</sup>H-NMR in DMSO-d<sub>6</sub>, 400 MHz

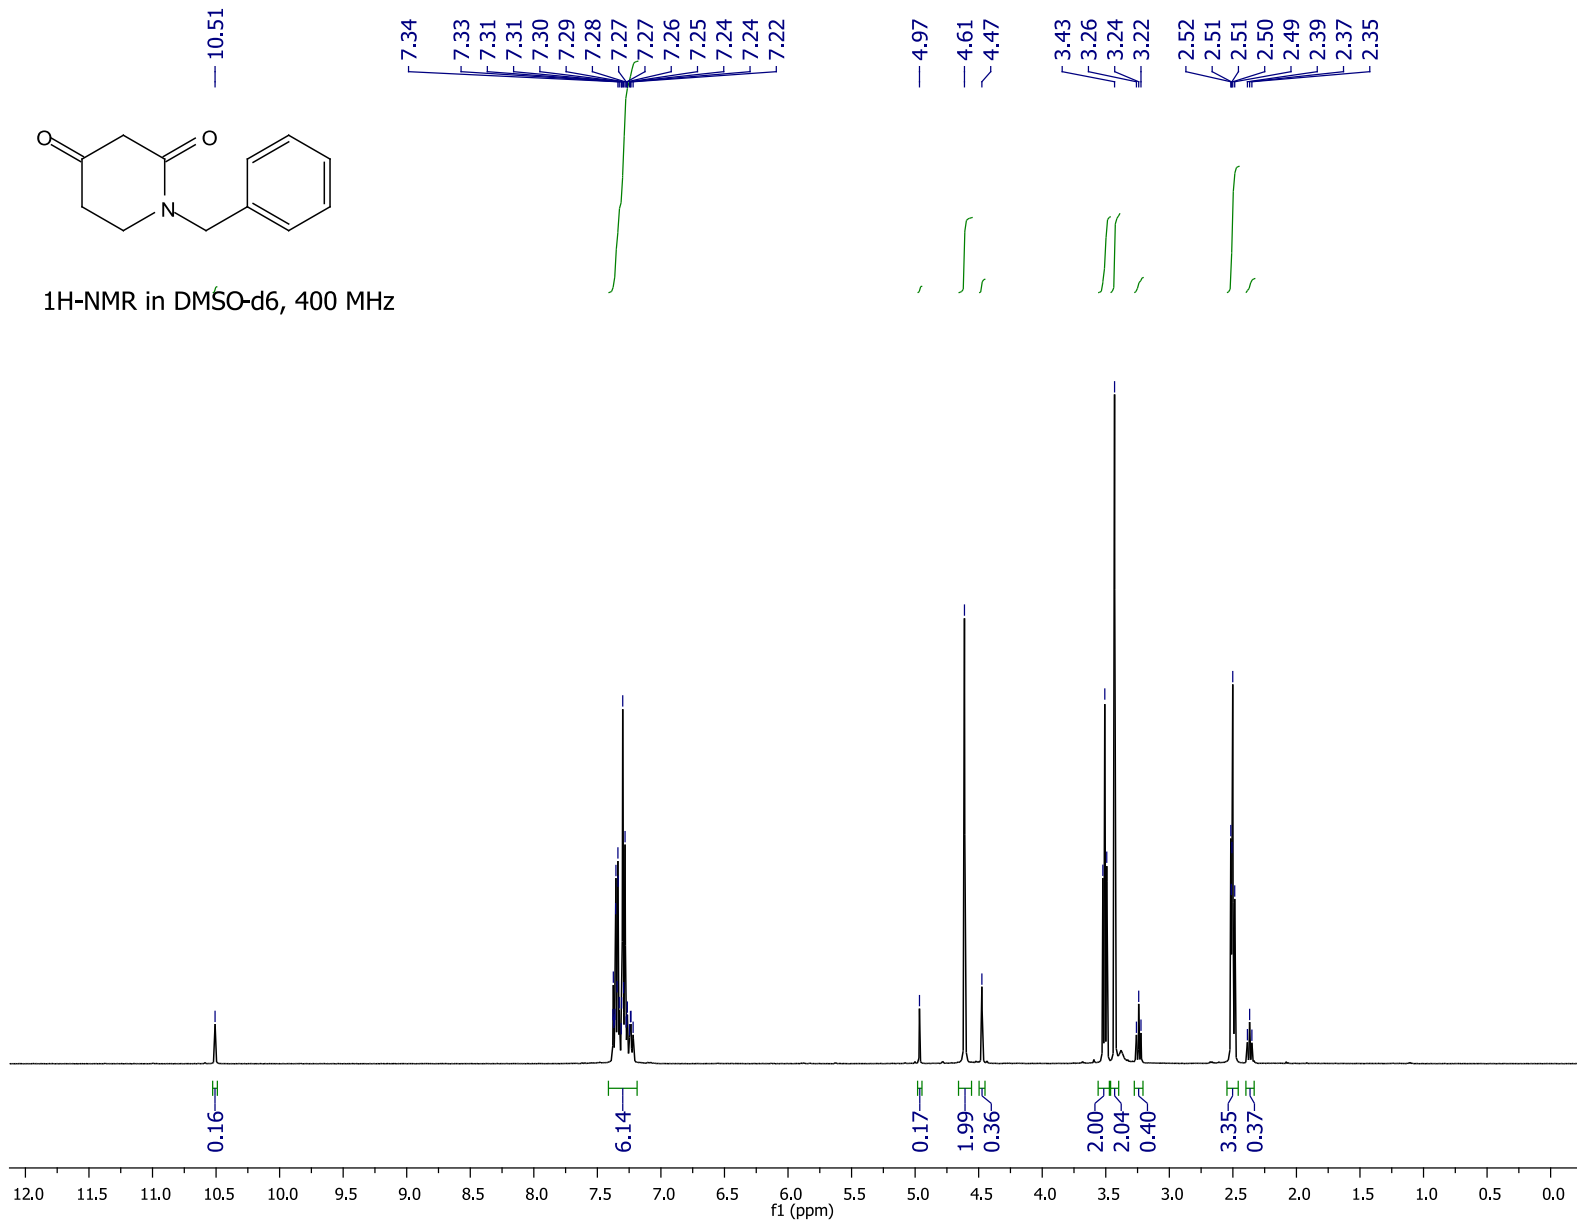

— 204.8  
167.6  
166.7  
166.2

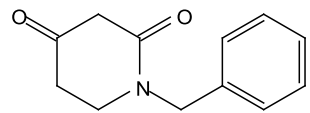

13C-NMR in DMSO-d6,100 MHz

138.3  
137.3  
128.5  
128.4  
127.5  
127.5  
127.2  
126.8

— 95.1

49.3  
49.0  
48.3  
39.9  
39.5  
39.1  
38.1  
— 27.5

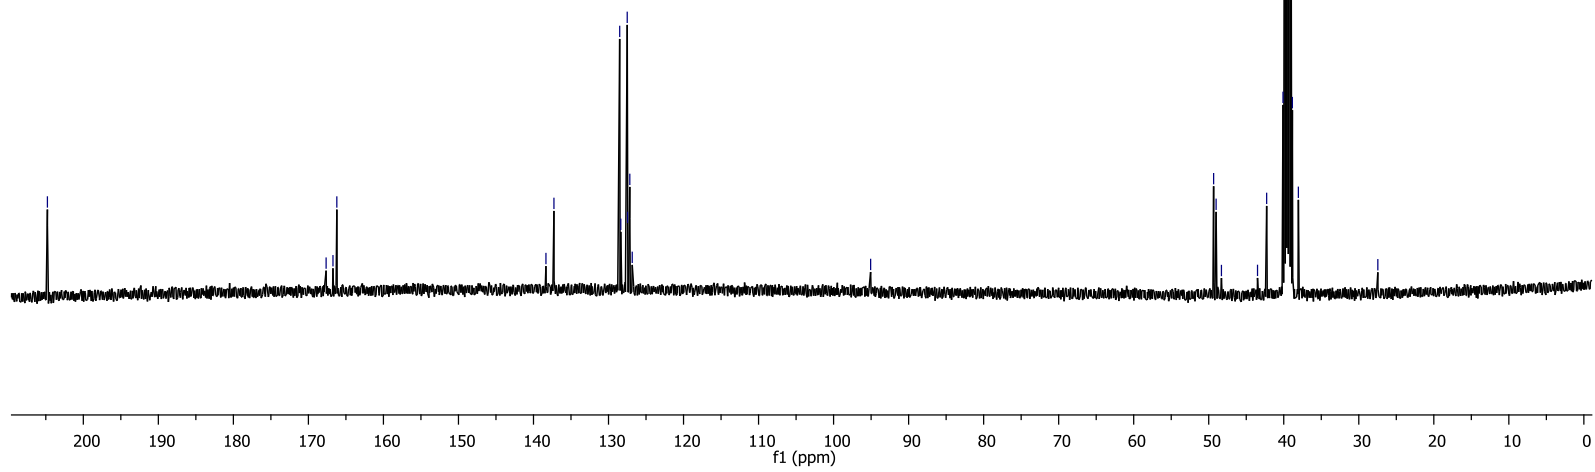

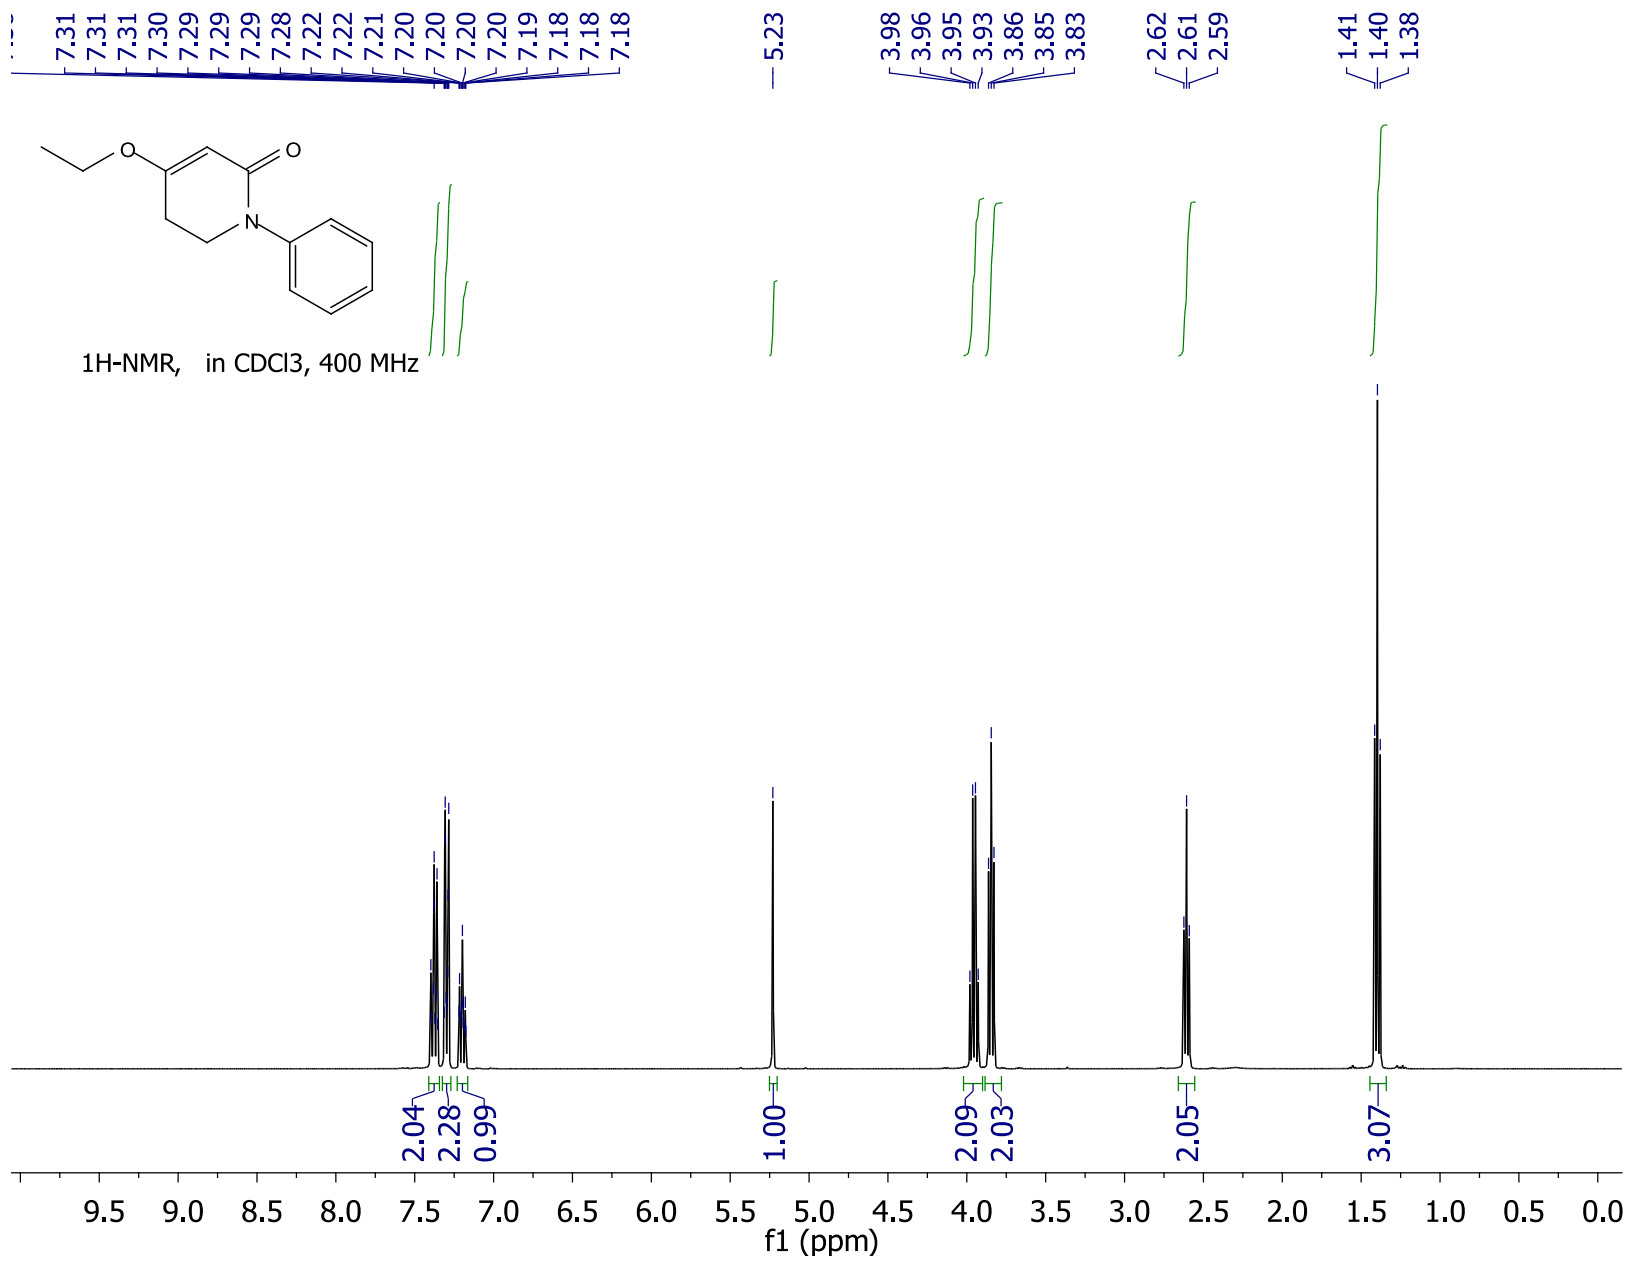

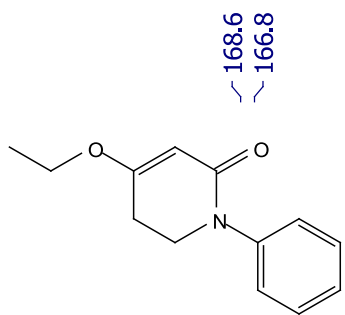

<sup>13</sup>C-NMR, in CDCl<sub>3</sub>, 100 MHz

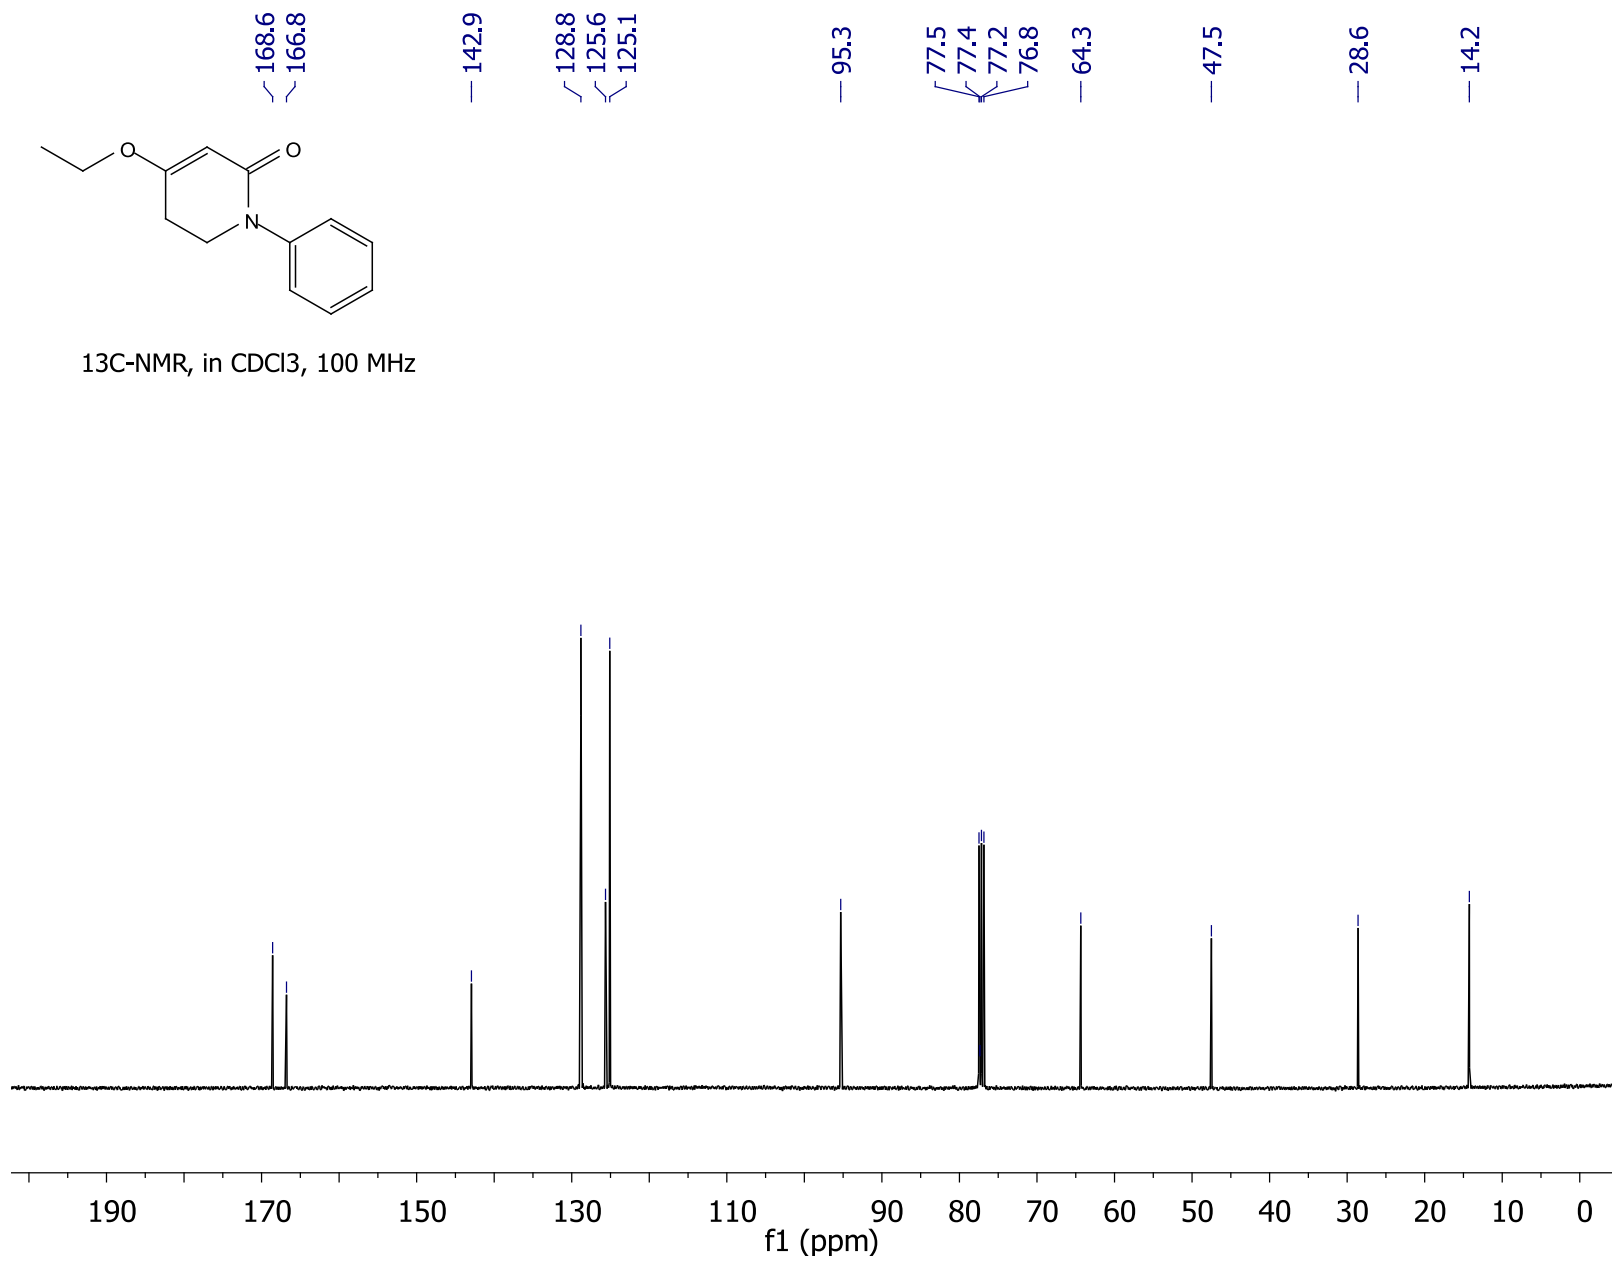

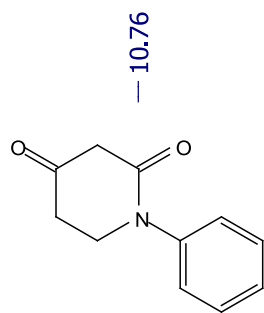

in DMSO-d6, 400 MHz

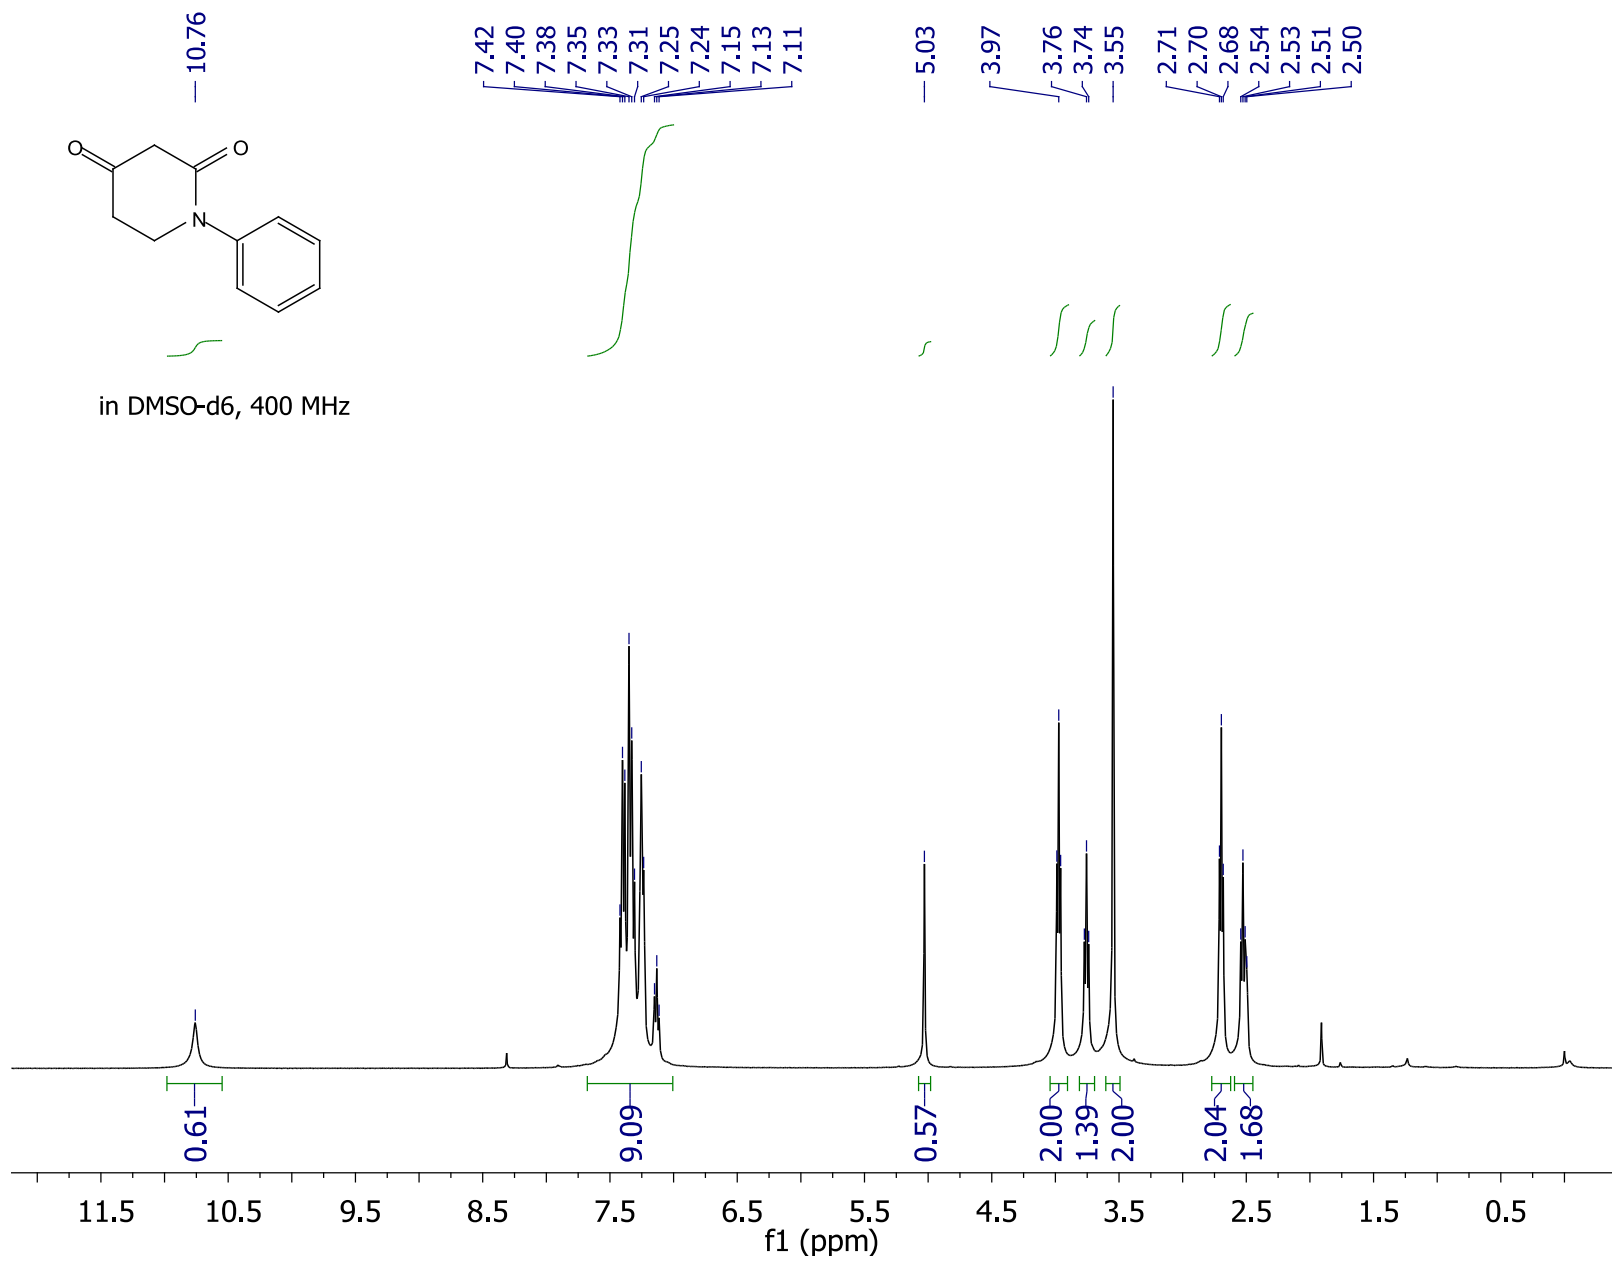

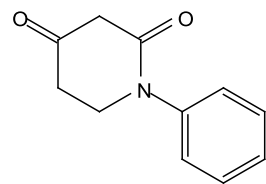

in DMSO-d6, 100 MHz

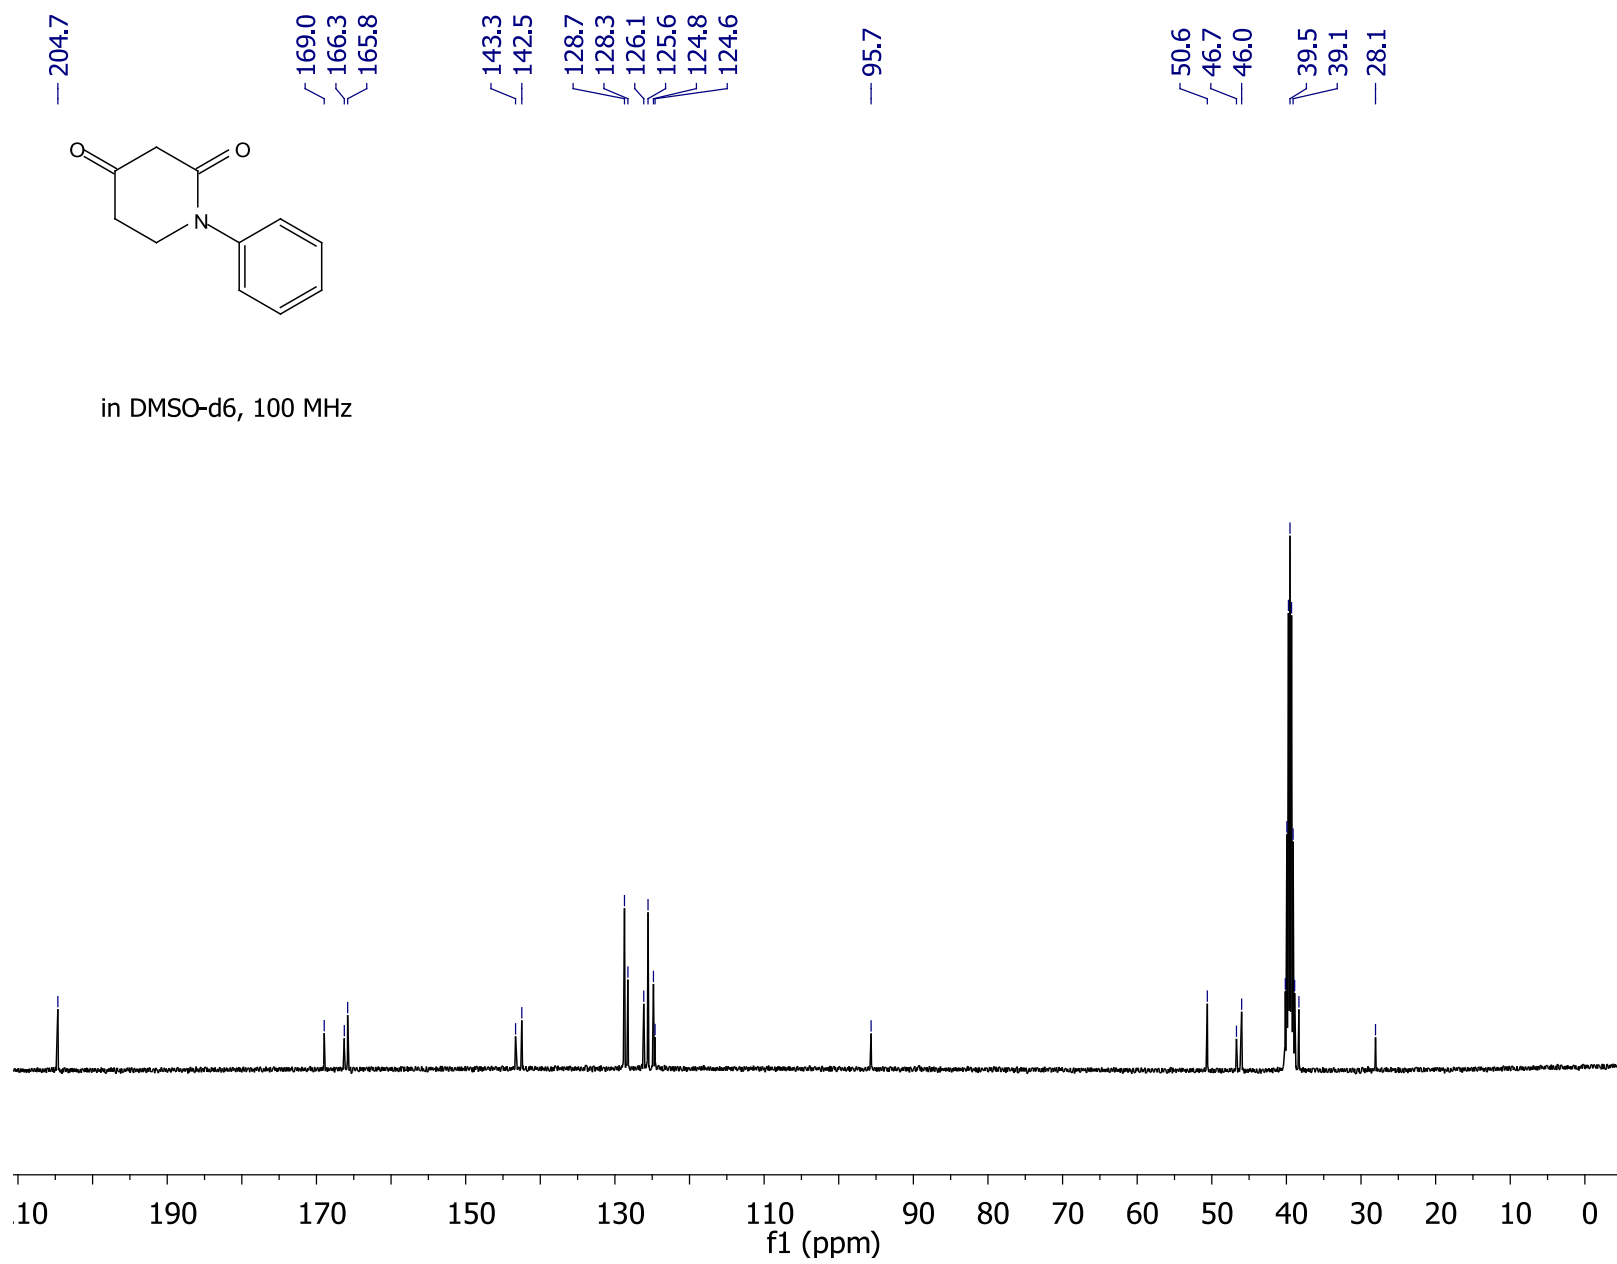

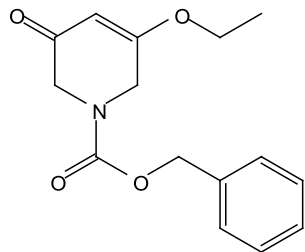

<sup>1</sup>H-NMR in CDCl<sub>3</sub>, 400 MHz

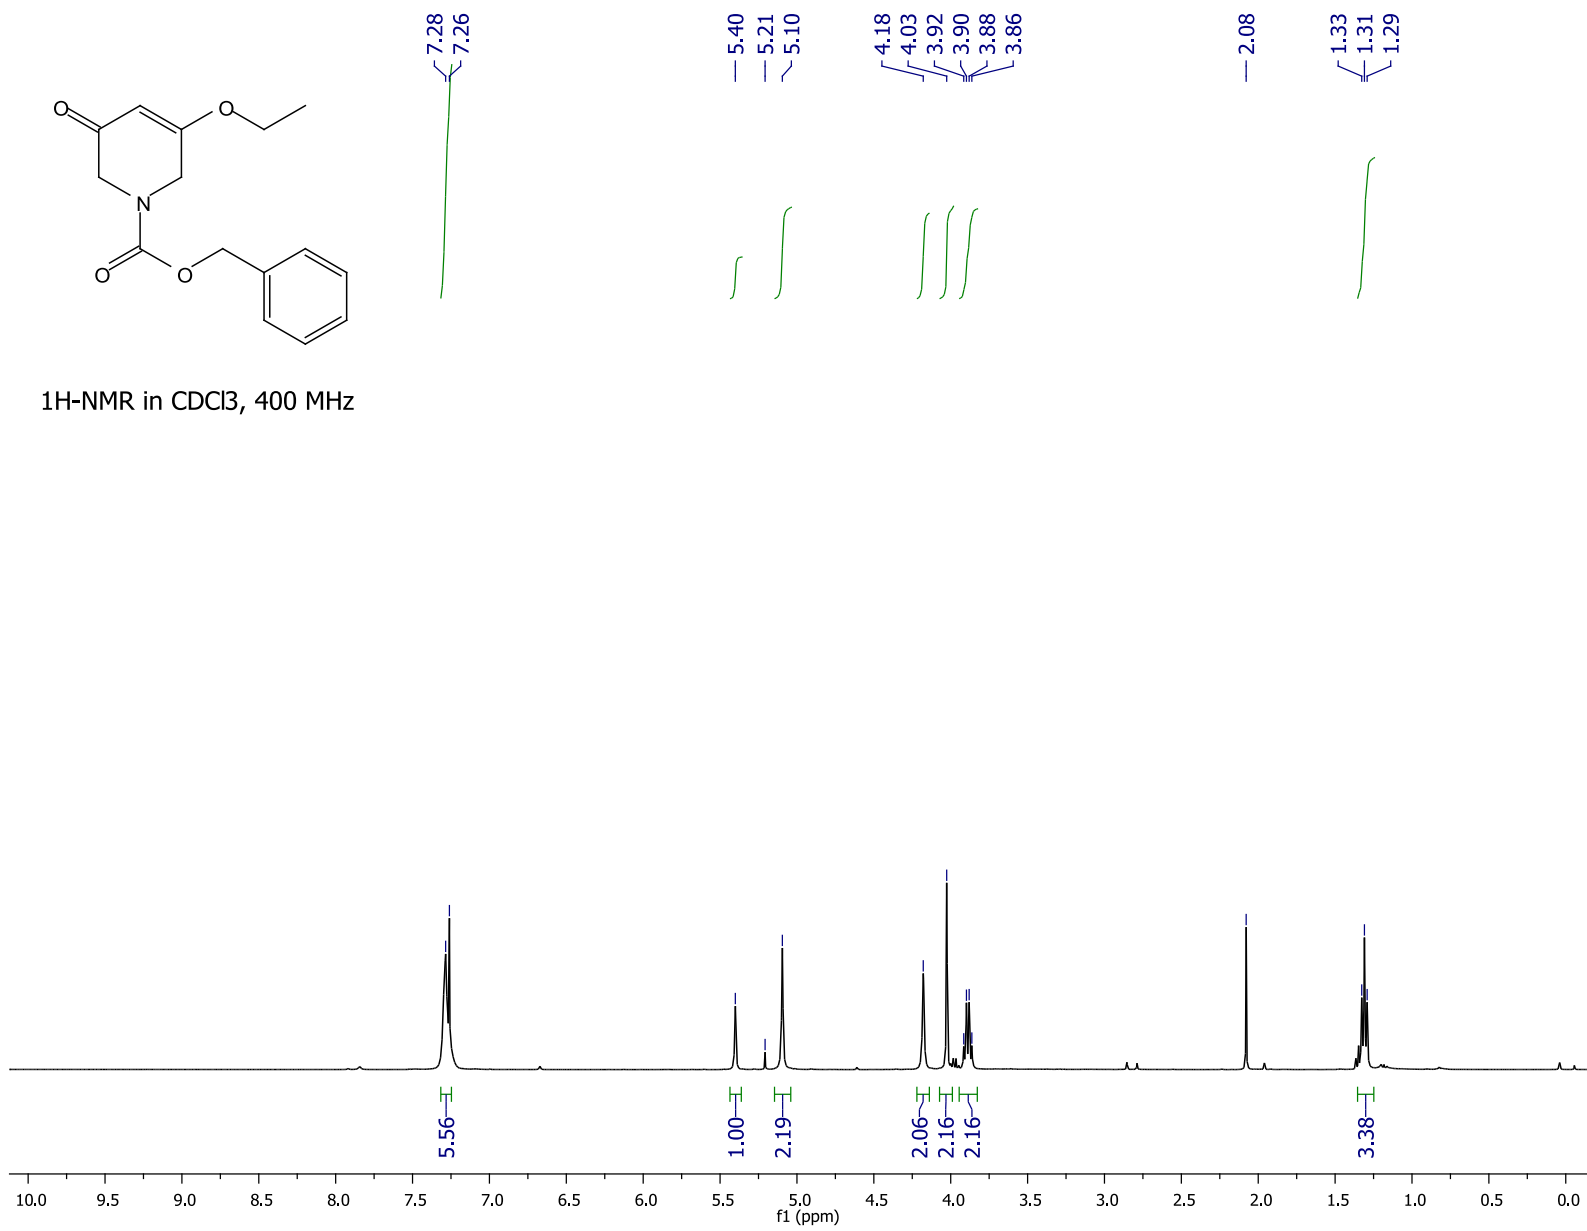



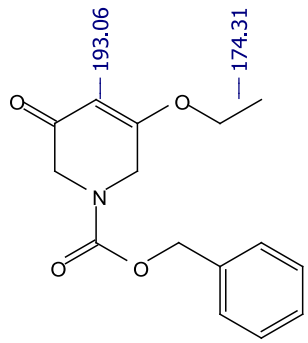

<sup>13</sup>C-NMR in CDCl<sub>3</sub>, 100 MHz

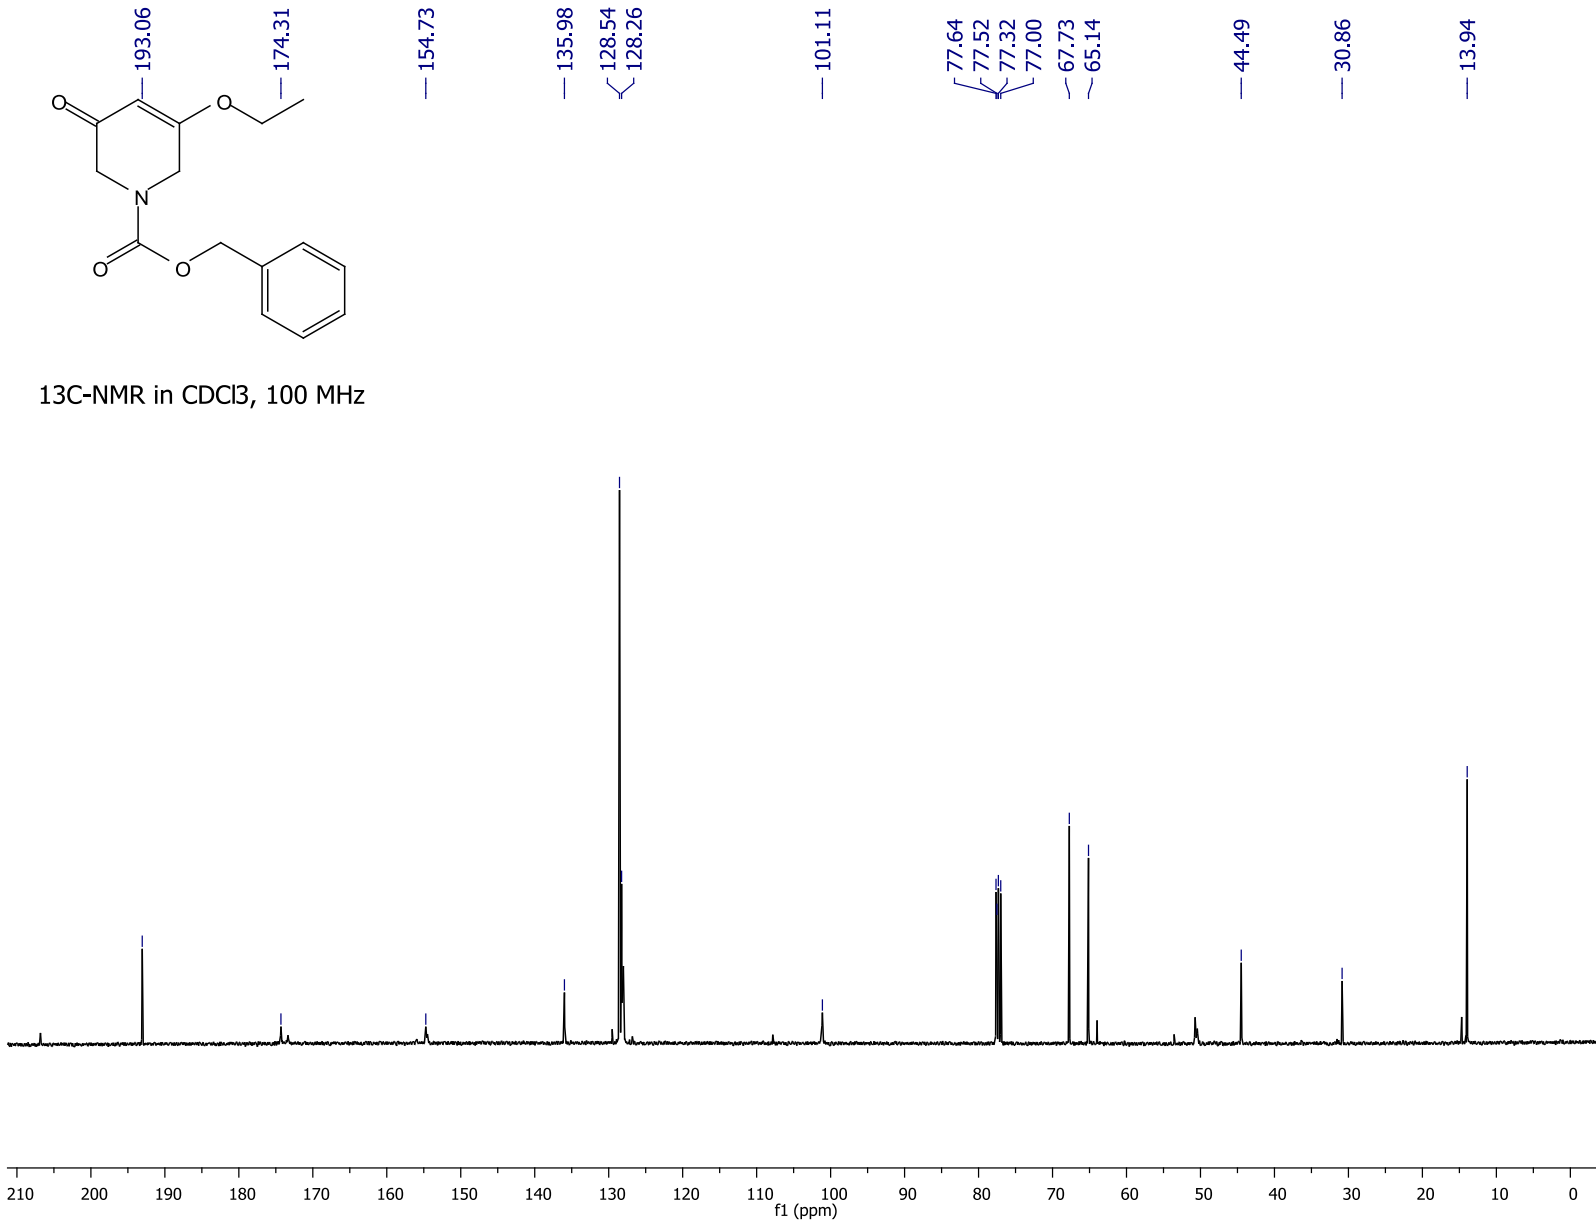

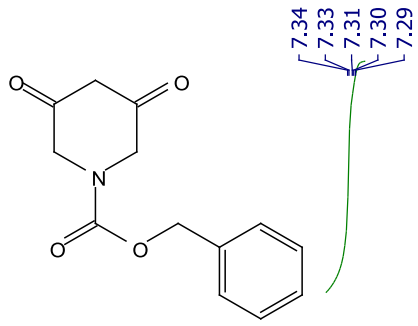

1-HNMR in DMSO-d6, 400 MHz

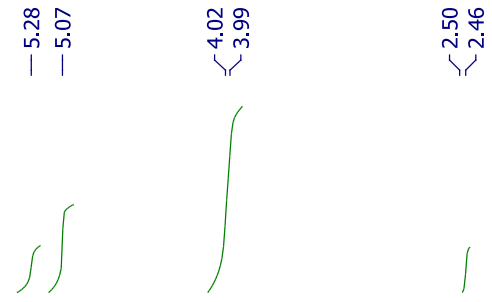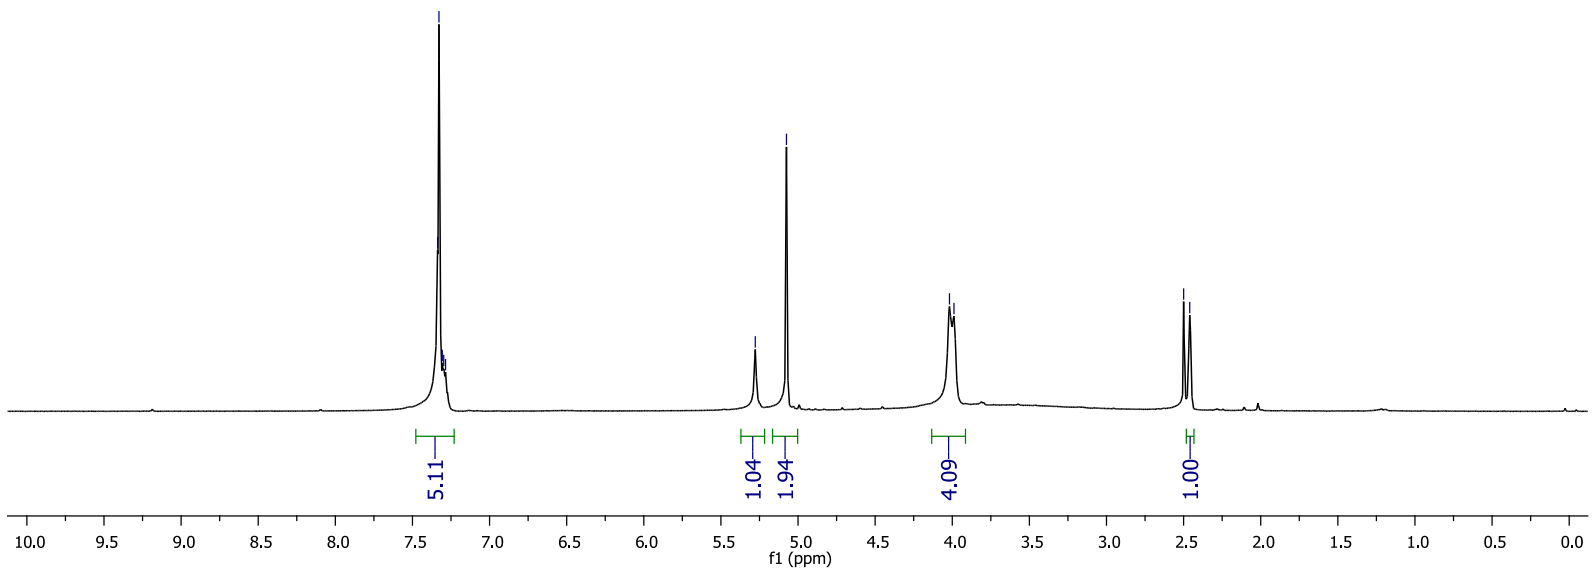

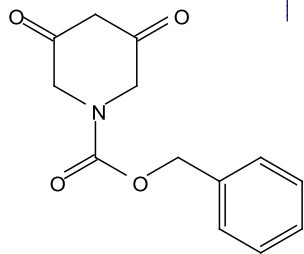

13-CNMR in DMSO-d6, 100 MHz

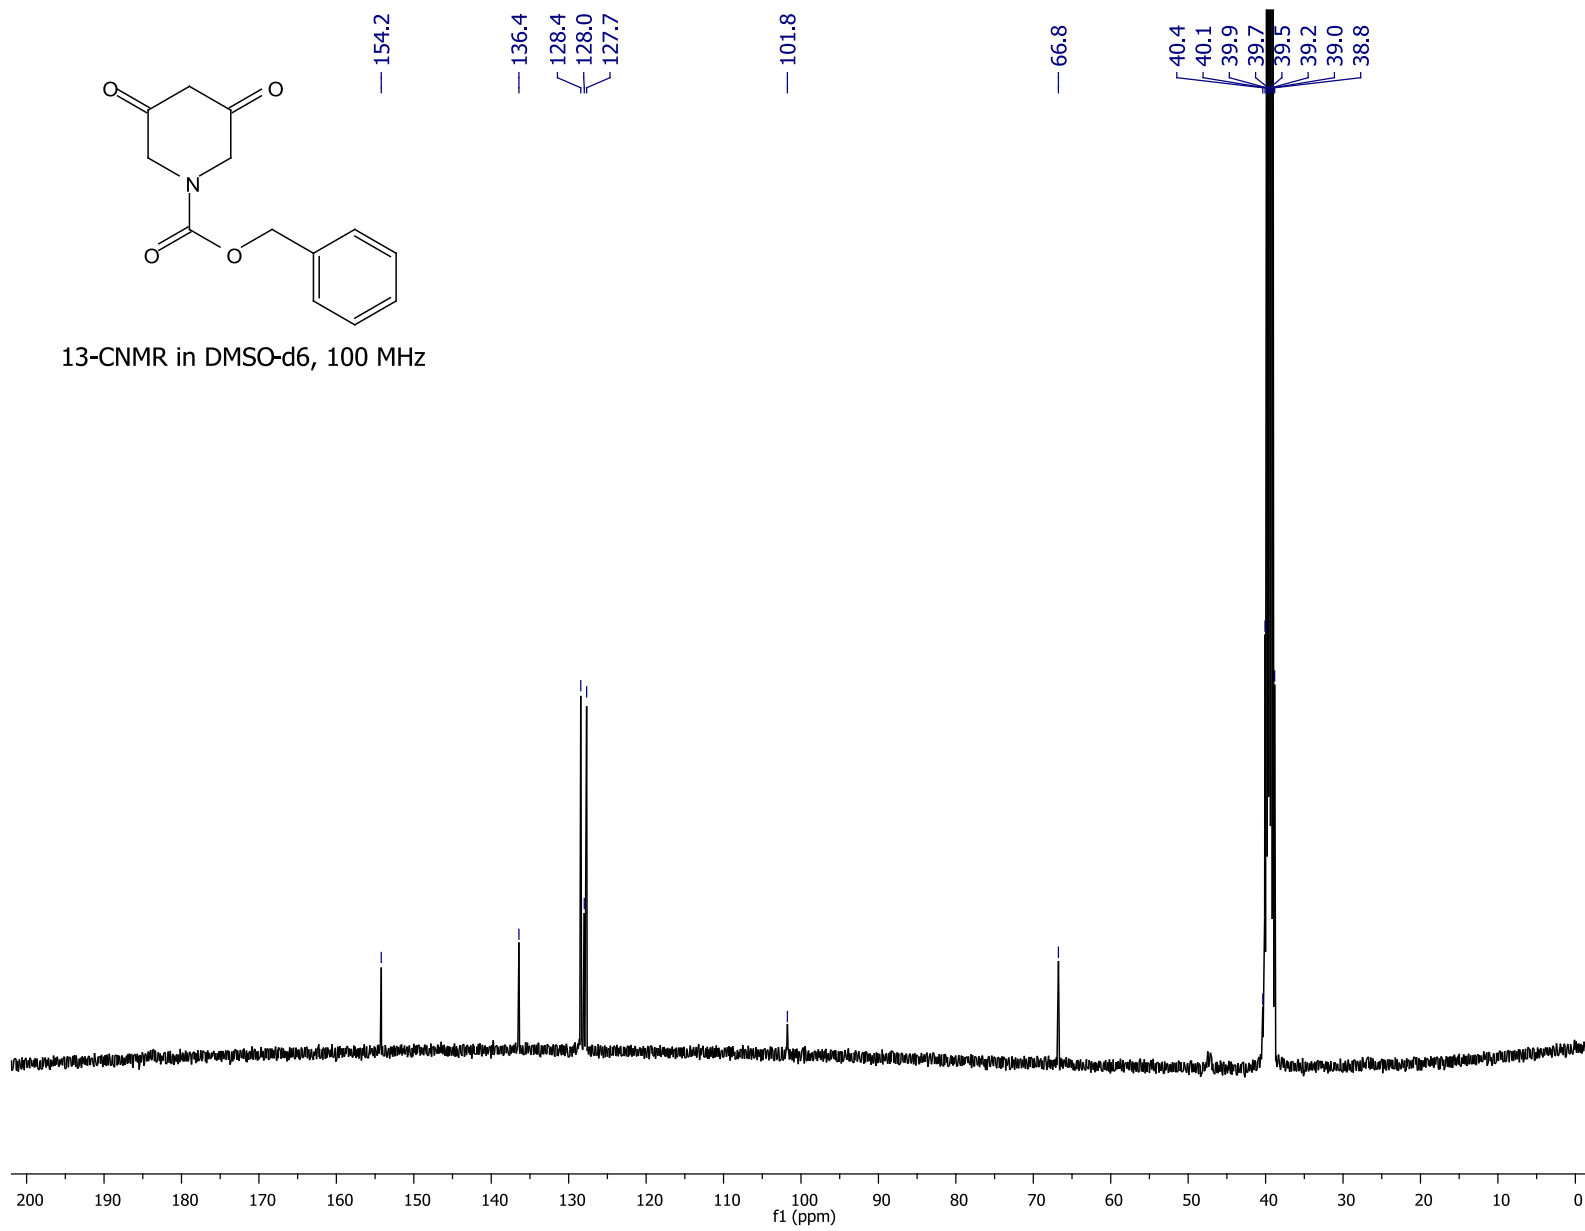

11.33

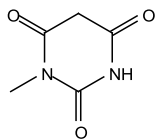

3.58

3.05

2.51

2.50

2.50

2.49

$^1\text{H-NMR}$  in DMSO- $d_6$ , 400 MHz

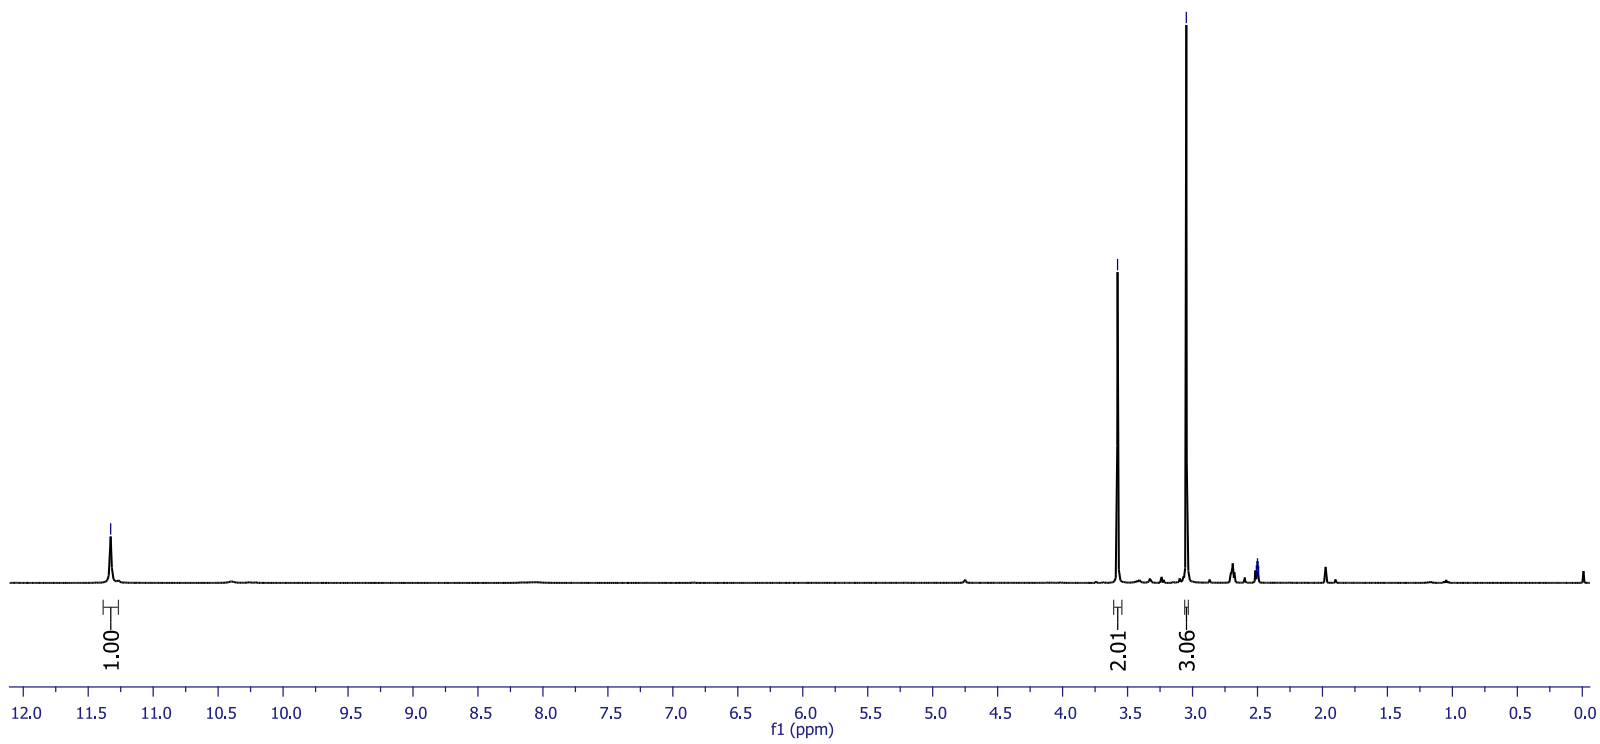

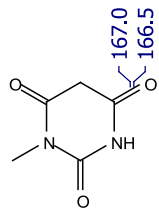

— 151.9

40.0  
39.8  
39.6  
39.6  
39.4  
39.2  
38.9  
38.7  
— 26.8

<sup>13</sup>C-NMR in DMSO-d<sub>6</sub>, 100 MHz

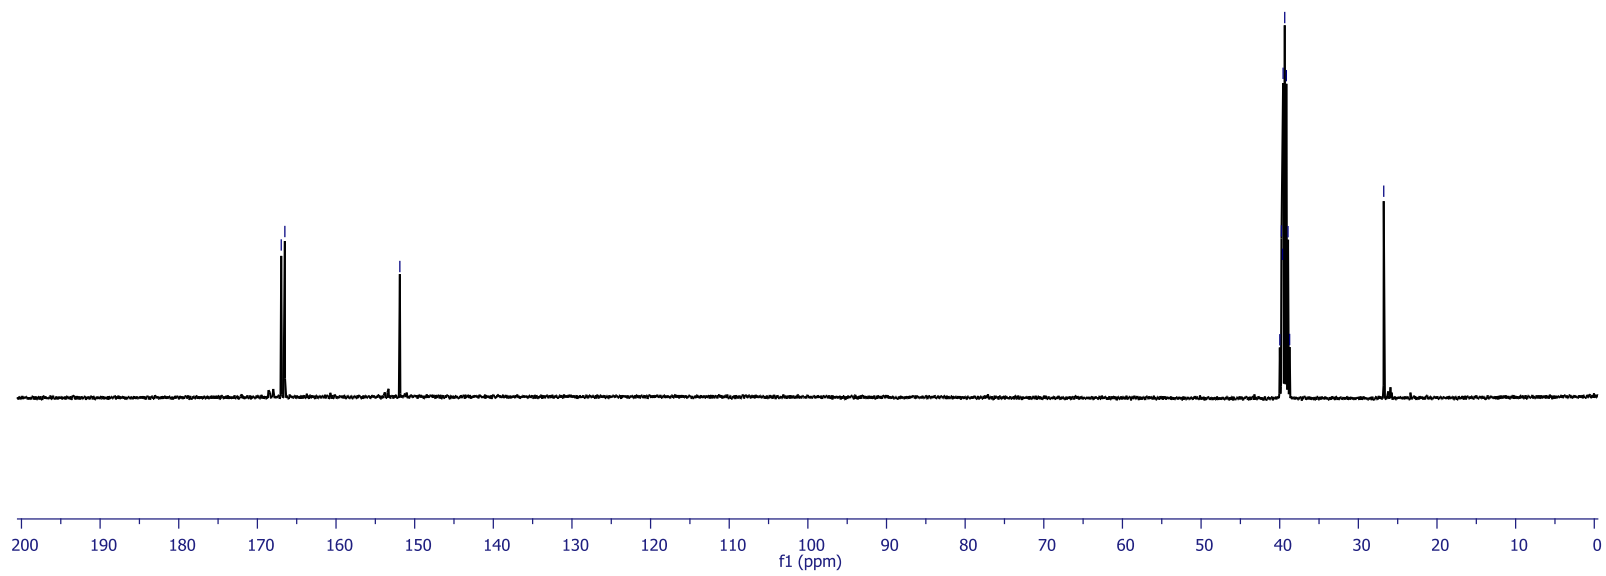

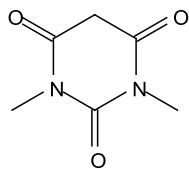

1H-NMR in DMSO-d6, 400 MHz

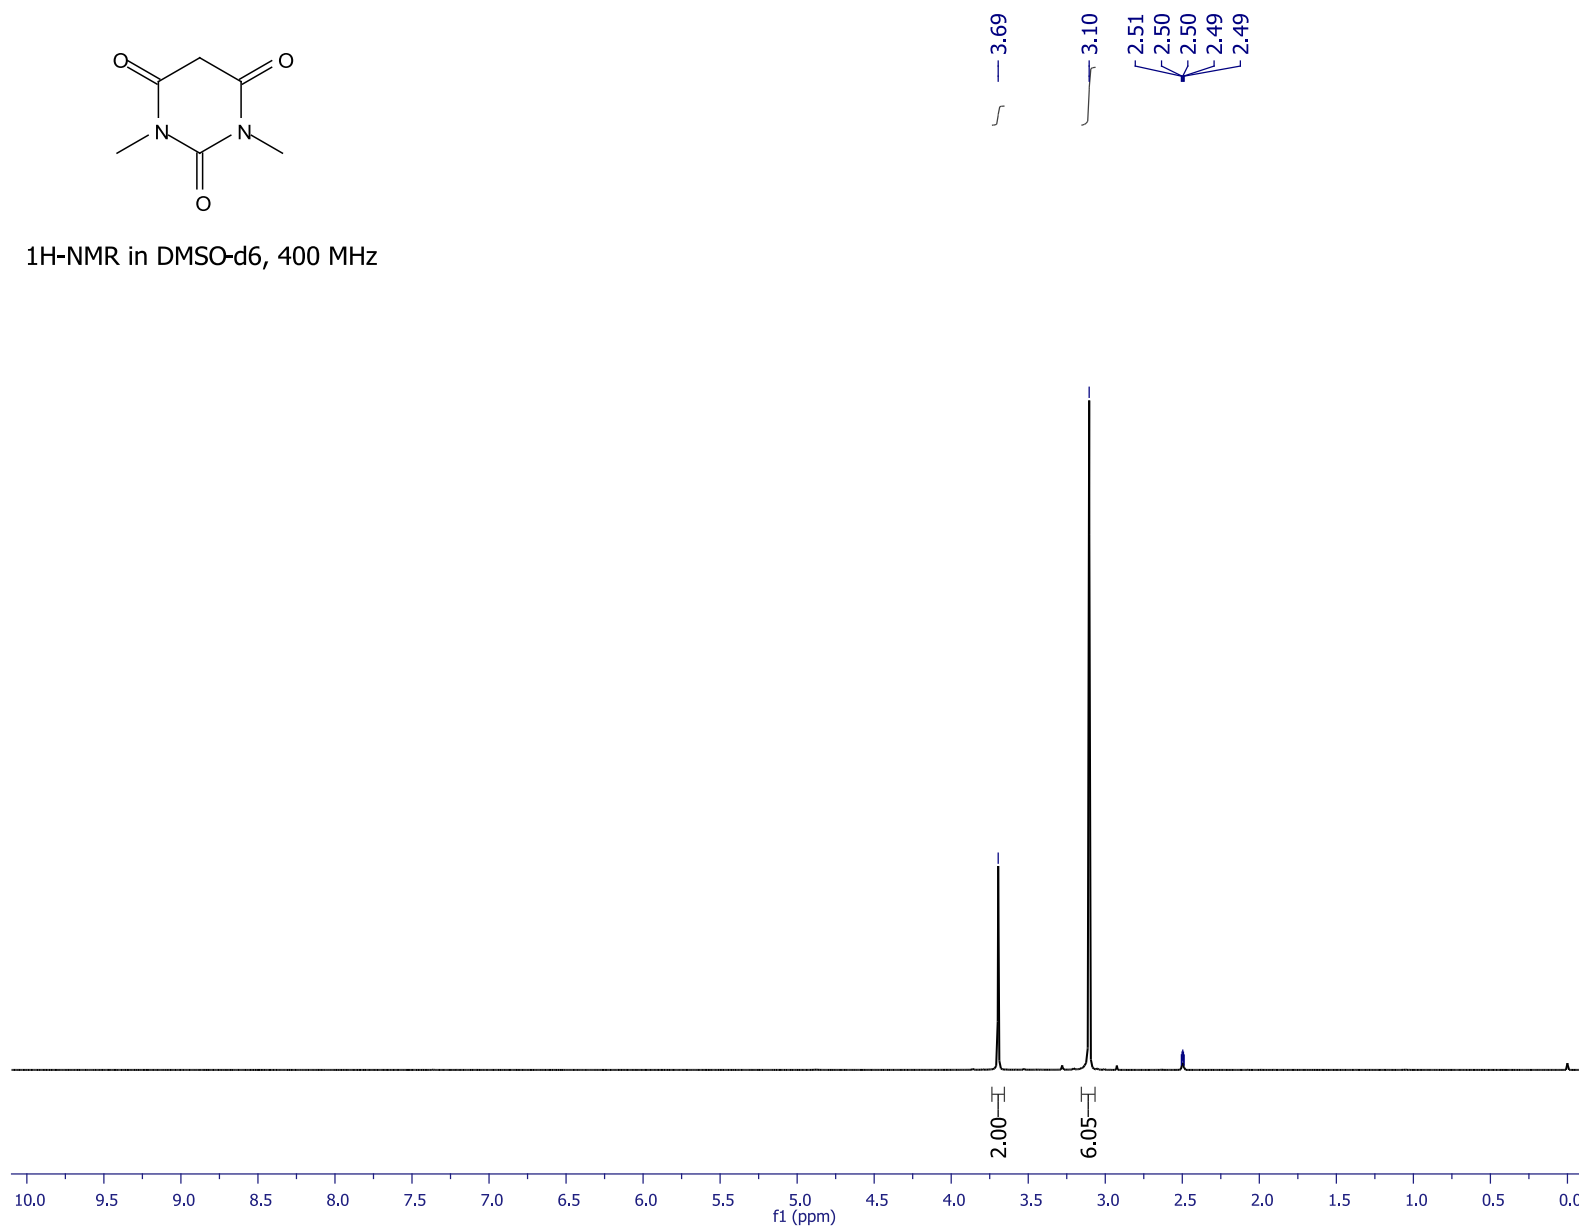

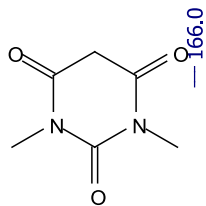

<sup>13</sup>C-NMR in DMSO-d<sub>6</sub>, 100 MHz

40.1  
39.9  
39.9  
39.7  
39.5  
39.3  
39.1  
38.9  
27.8

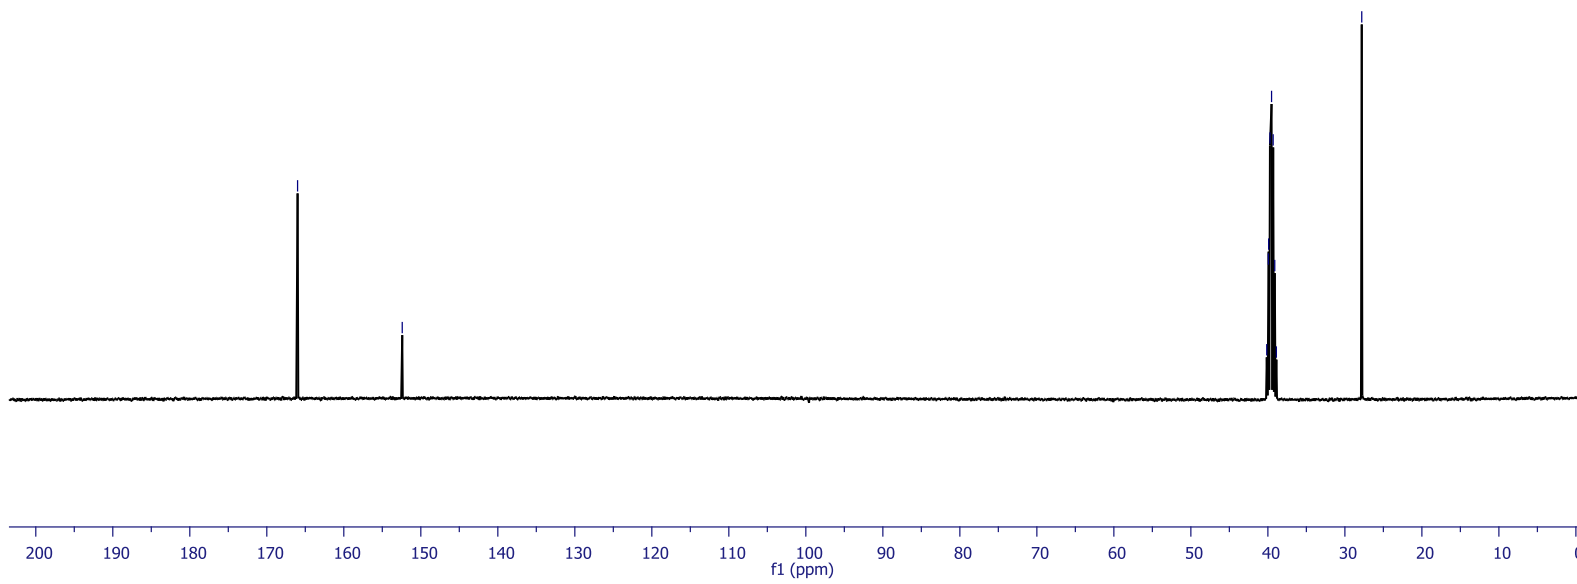

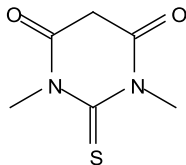

<sup>1</sup>H-NMR, in DMSO-d<sub>6</sub>, 400 MHz

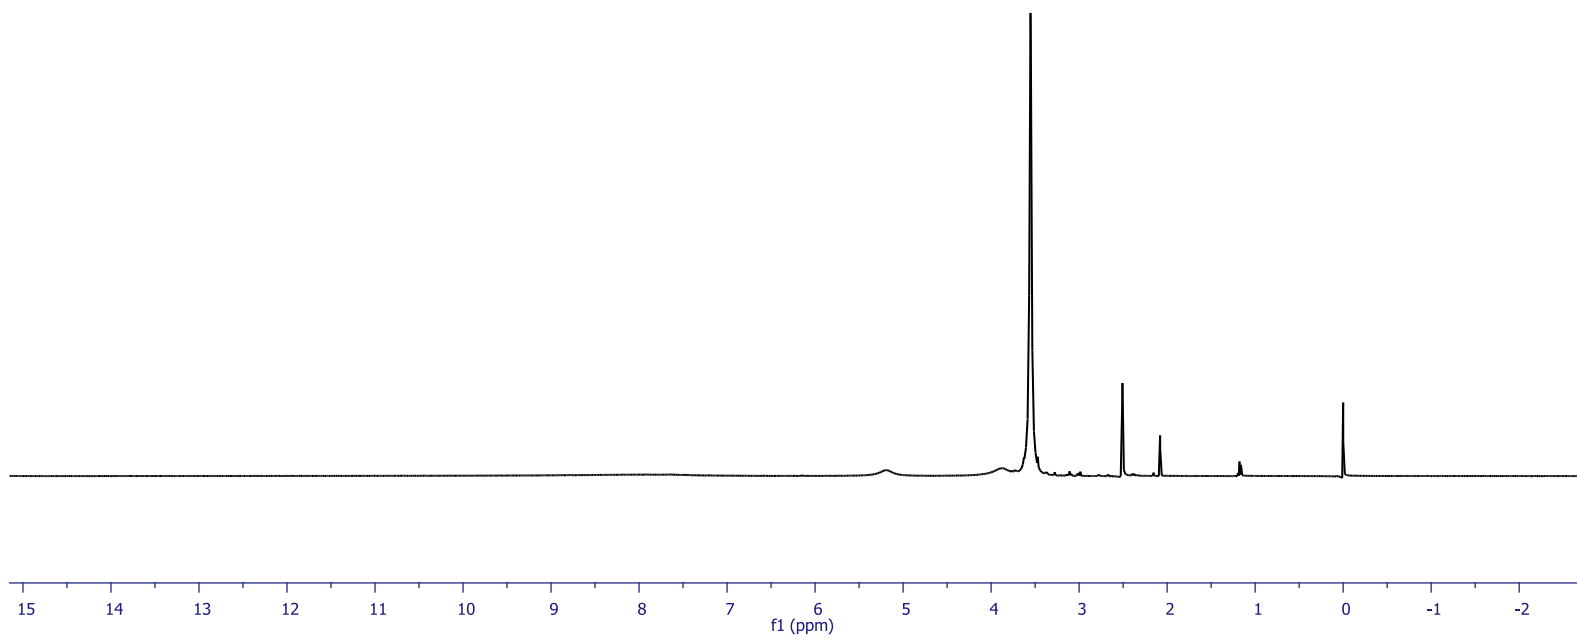





$^{13}\text{C}$ -NMR, in DMSO- $d_6$ , 100 MHz

40.1  
39.9  
39.7  
39.5  
39.3  
39.1  
38.9  
35.0

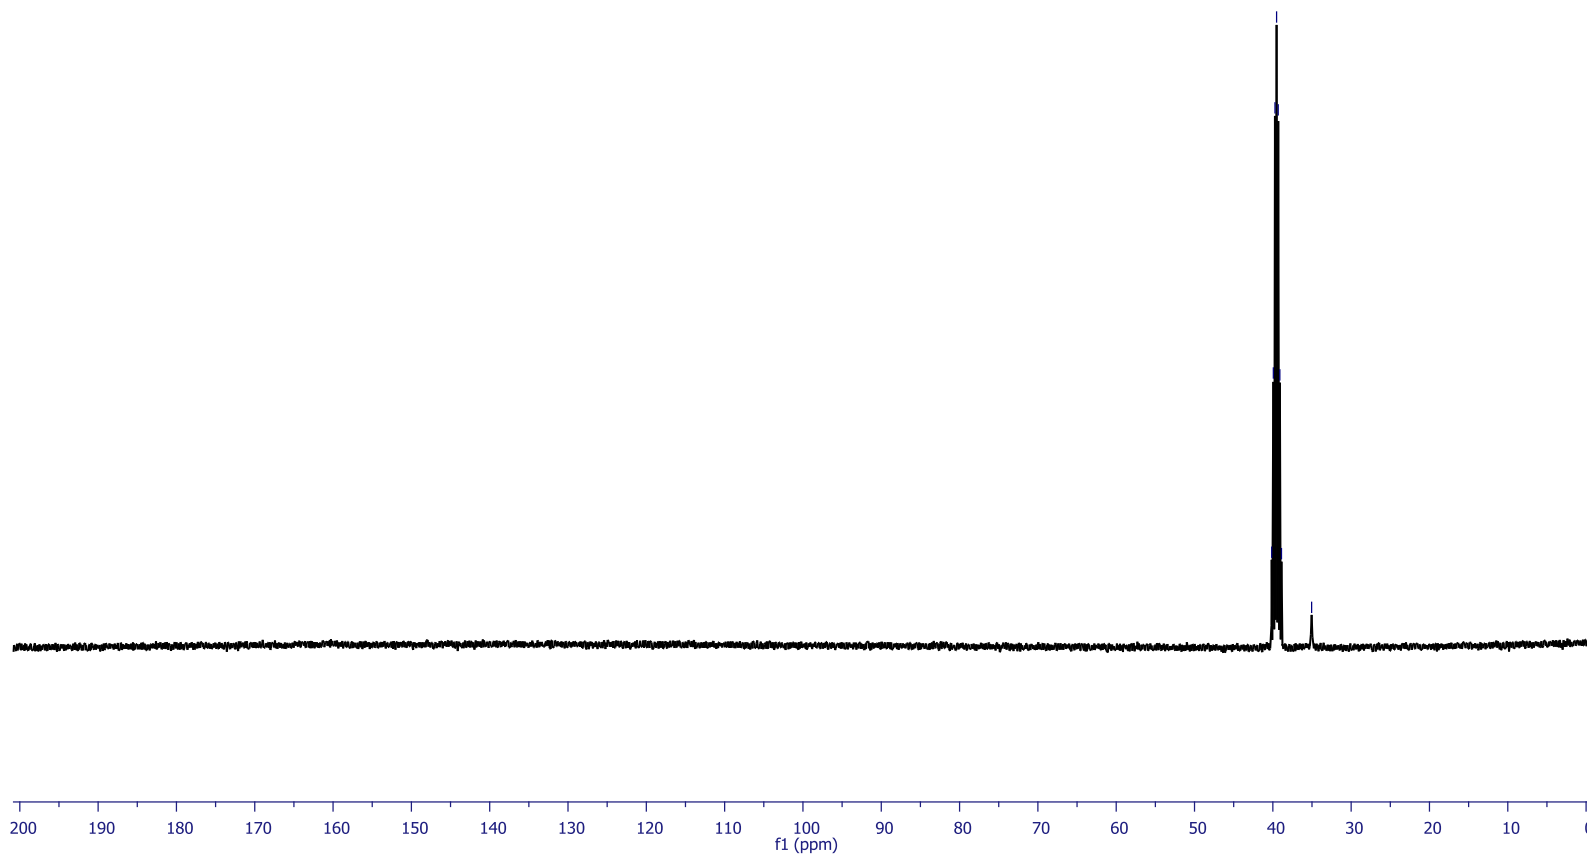

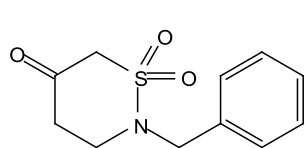

<sup>1</sup>H-NMR, in CDCl<sub>3</sub>, 400 MHz

7.32  
7.28  
7.27  
7.24

4.40

3.92

3.33

3.31

3.30

2.43

2.42

2.40

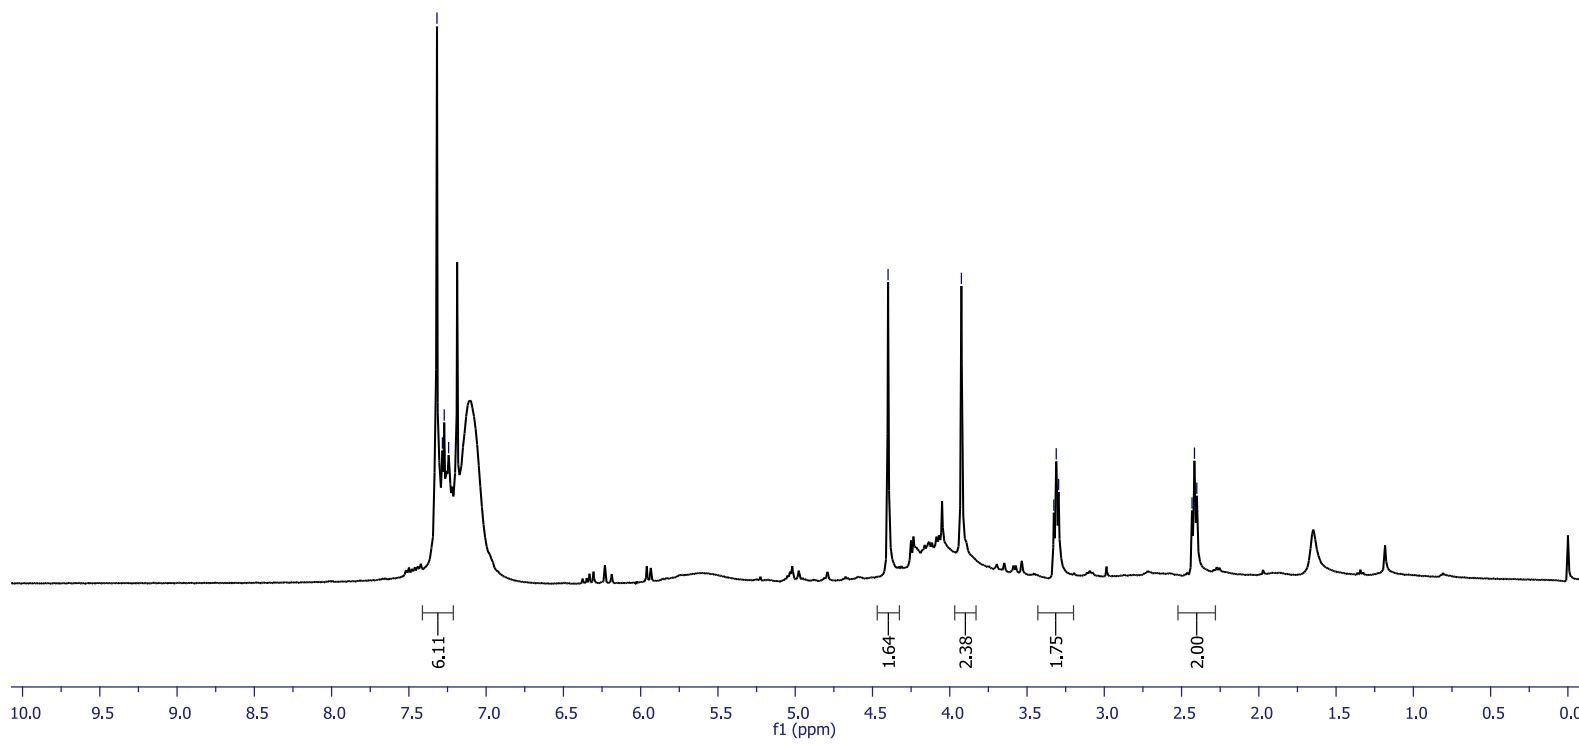

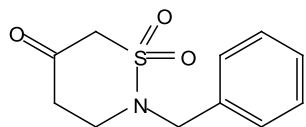

<sup>13</sup>C-NMR, in CDCl<sub>3</sub>, 100 MHz

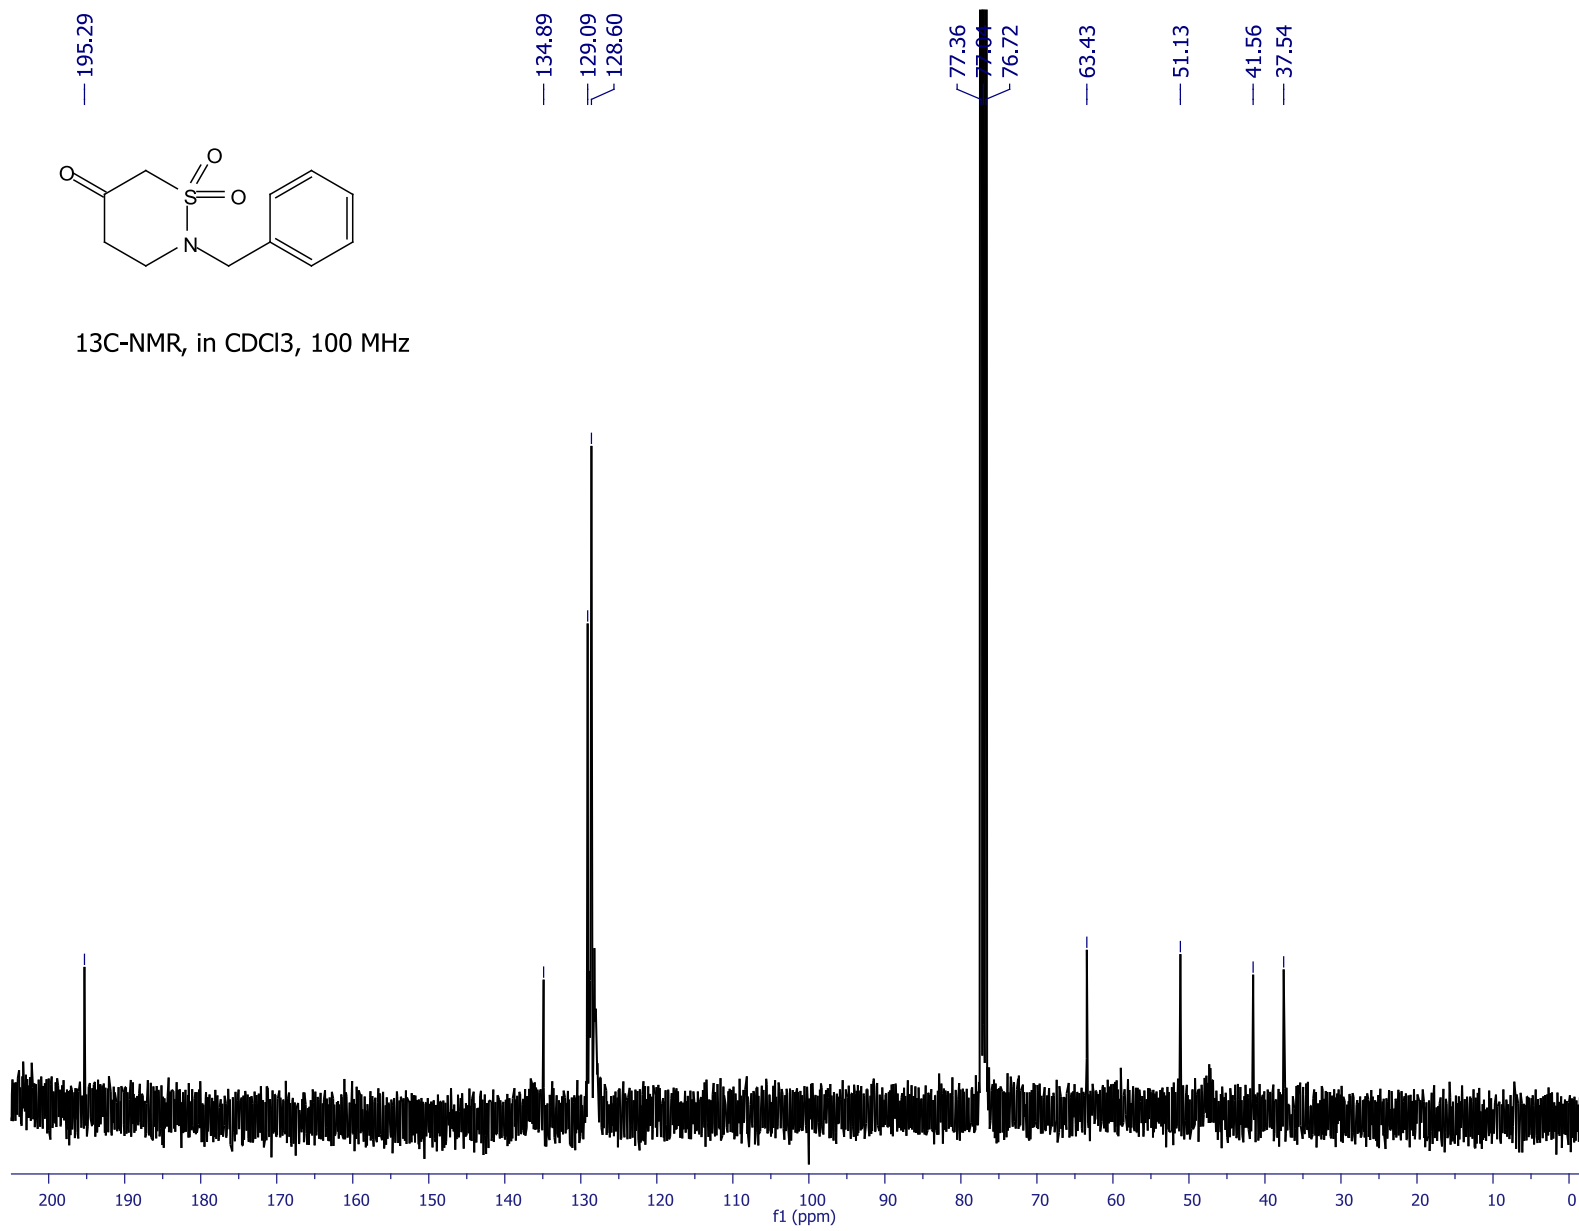

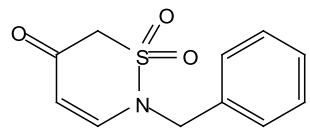

<sup>1</sup>H-NMR, in CDCl<sub>3</sub>, 400 MHz

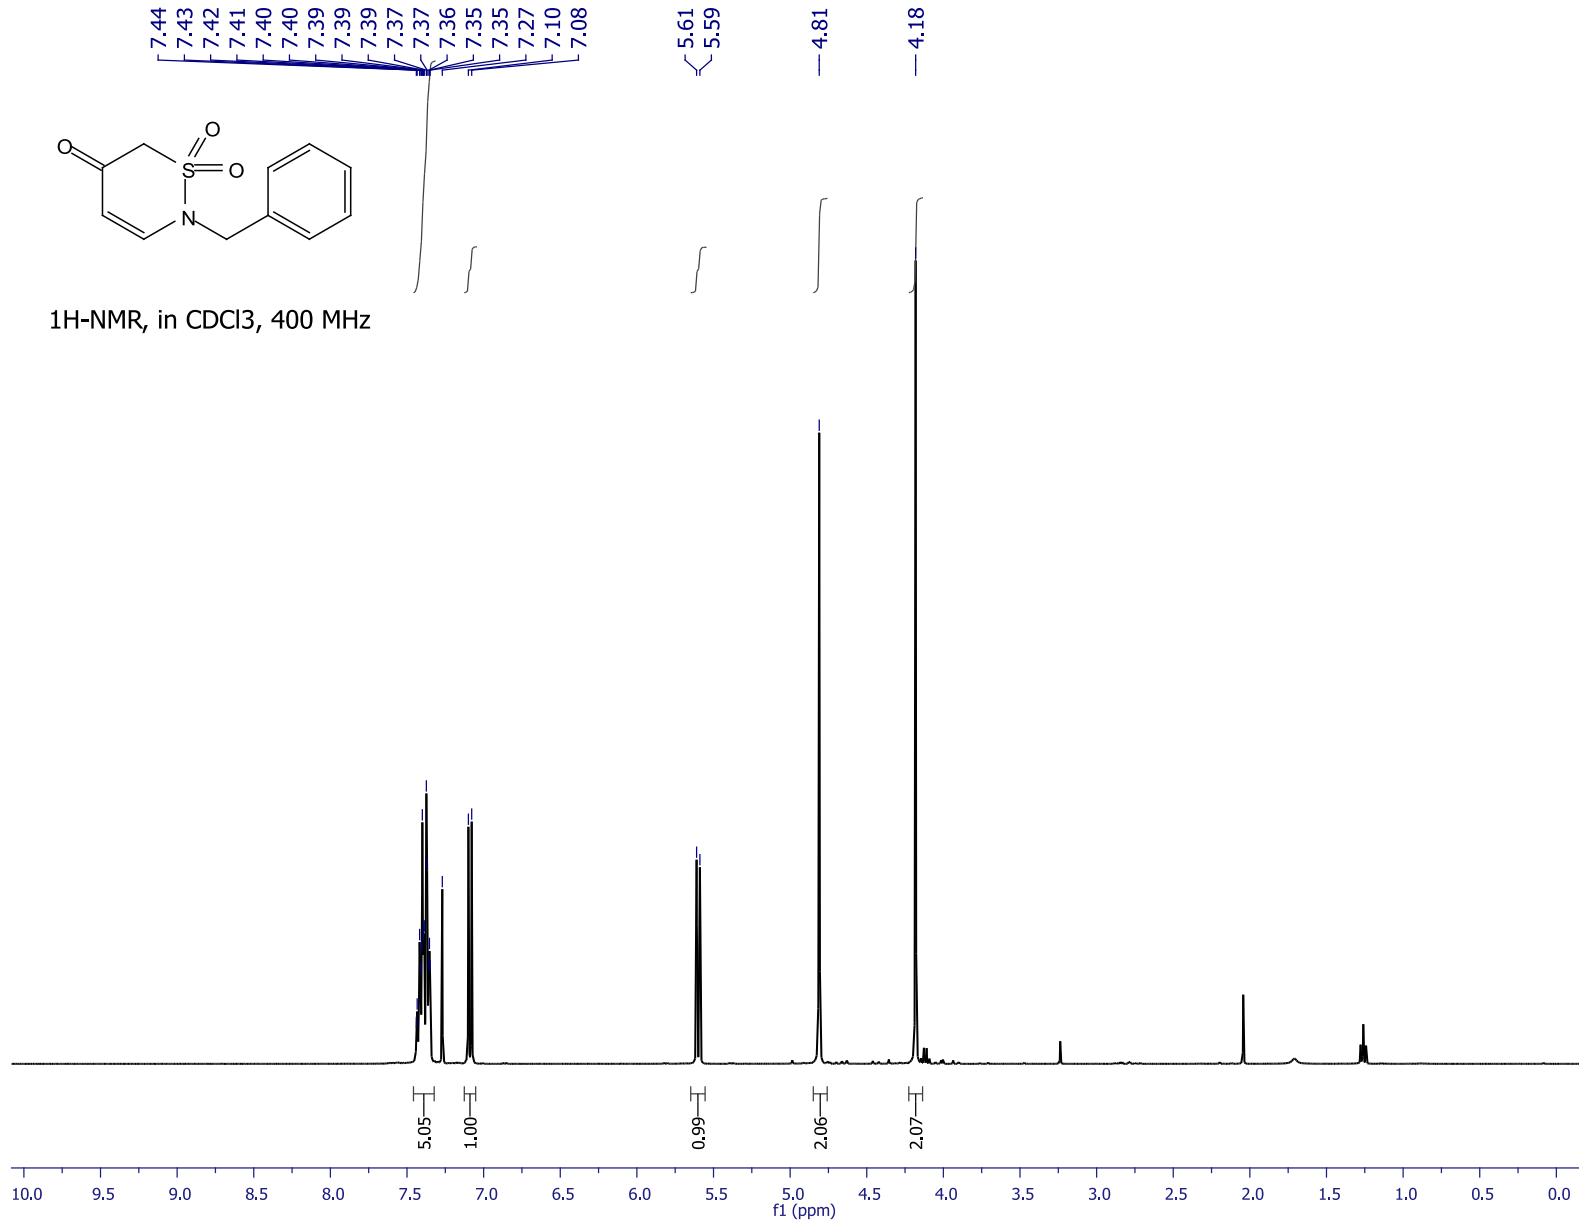

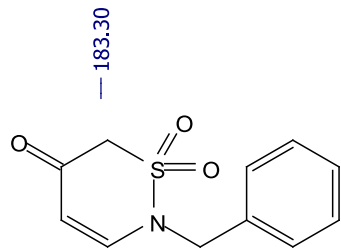

$^{13}\text{C-NMR}$ , in  $\text{CDCl}_3$ , 100 MHz

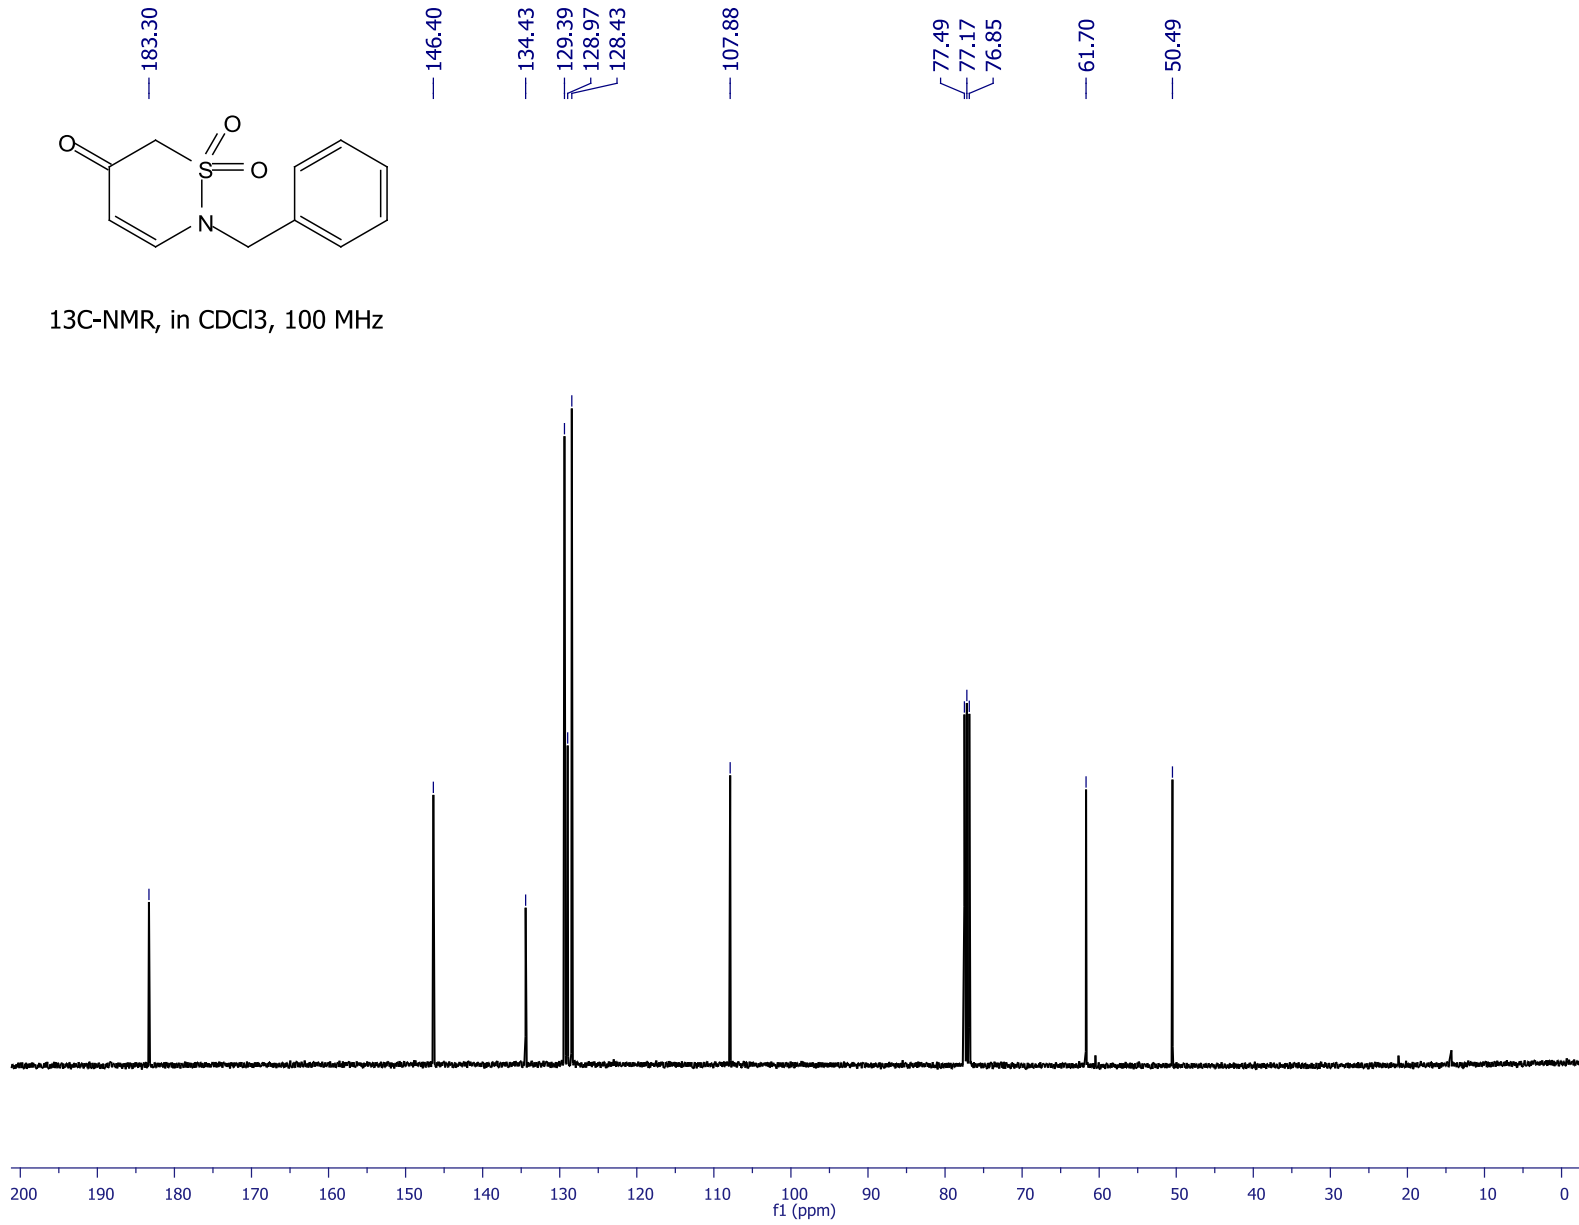

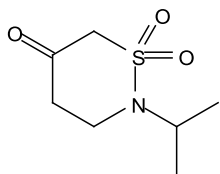

in CDCl<sub>3</sub>, 400 MHz

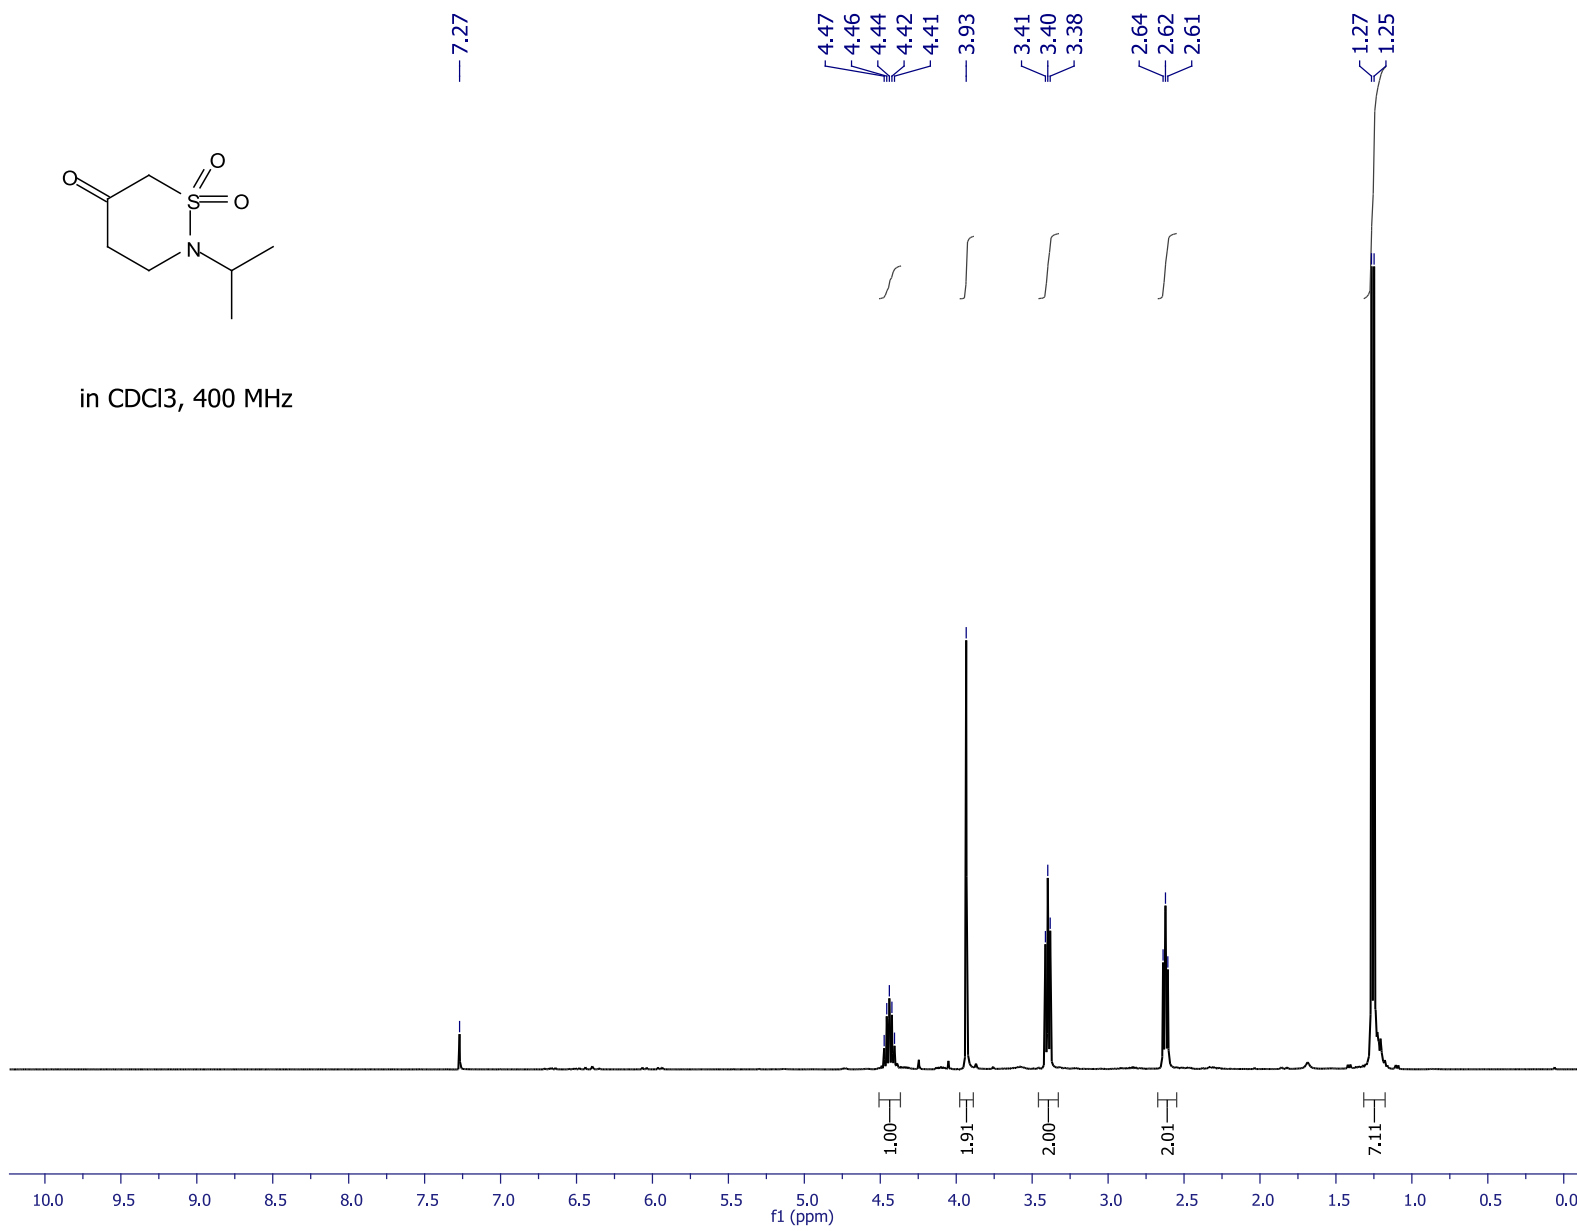

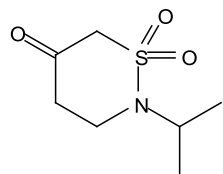

in CDCl<sub>3</sub>, 100 MHz

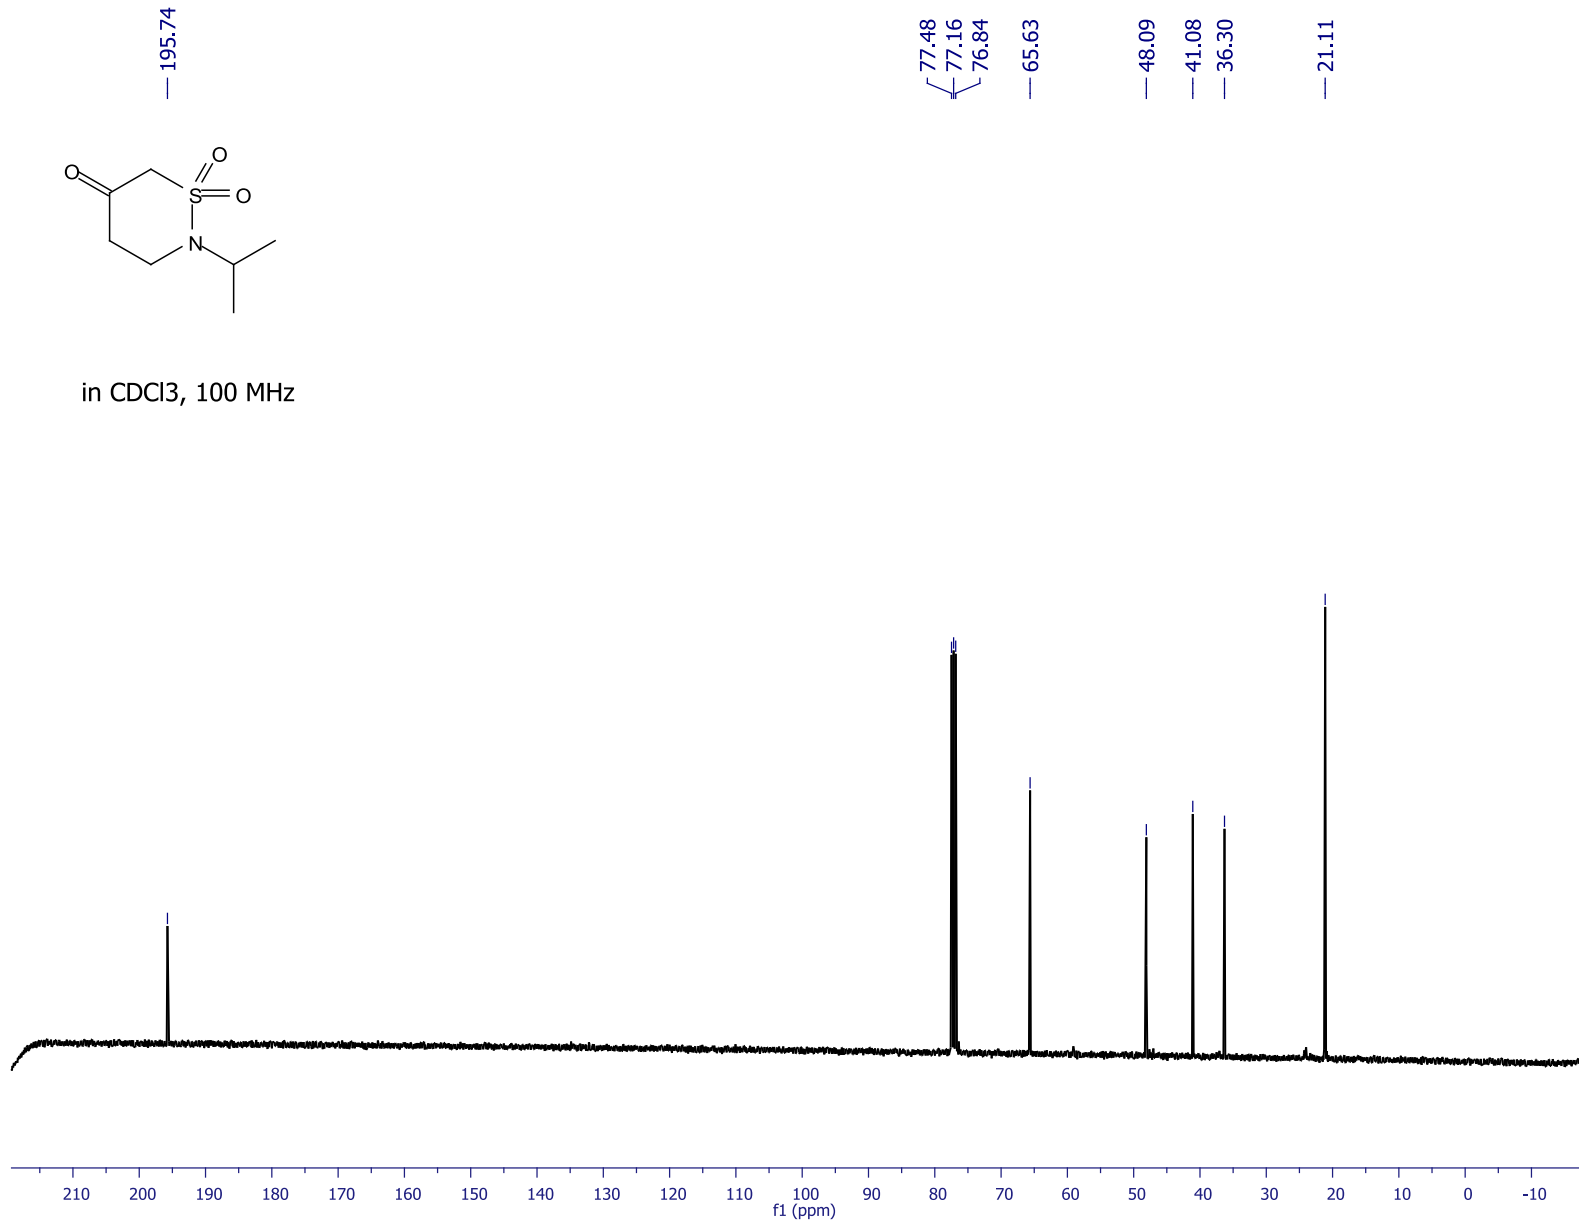

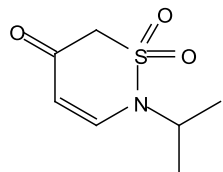

<sup>1</sup>H-NMR, in CDCl<sub>3</sub>, 400 MHz

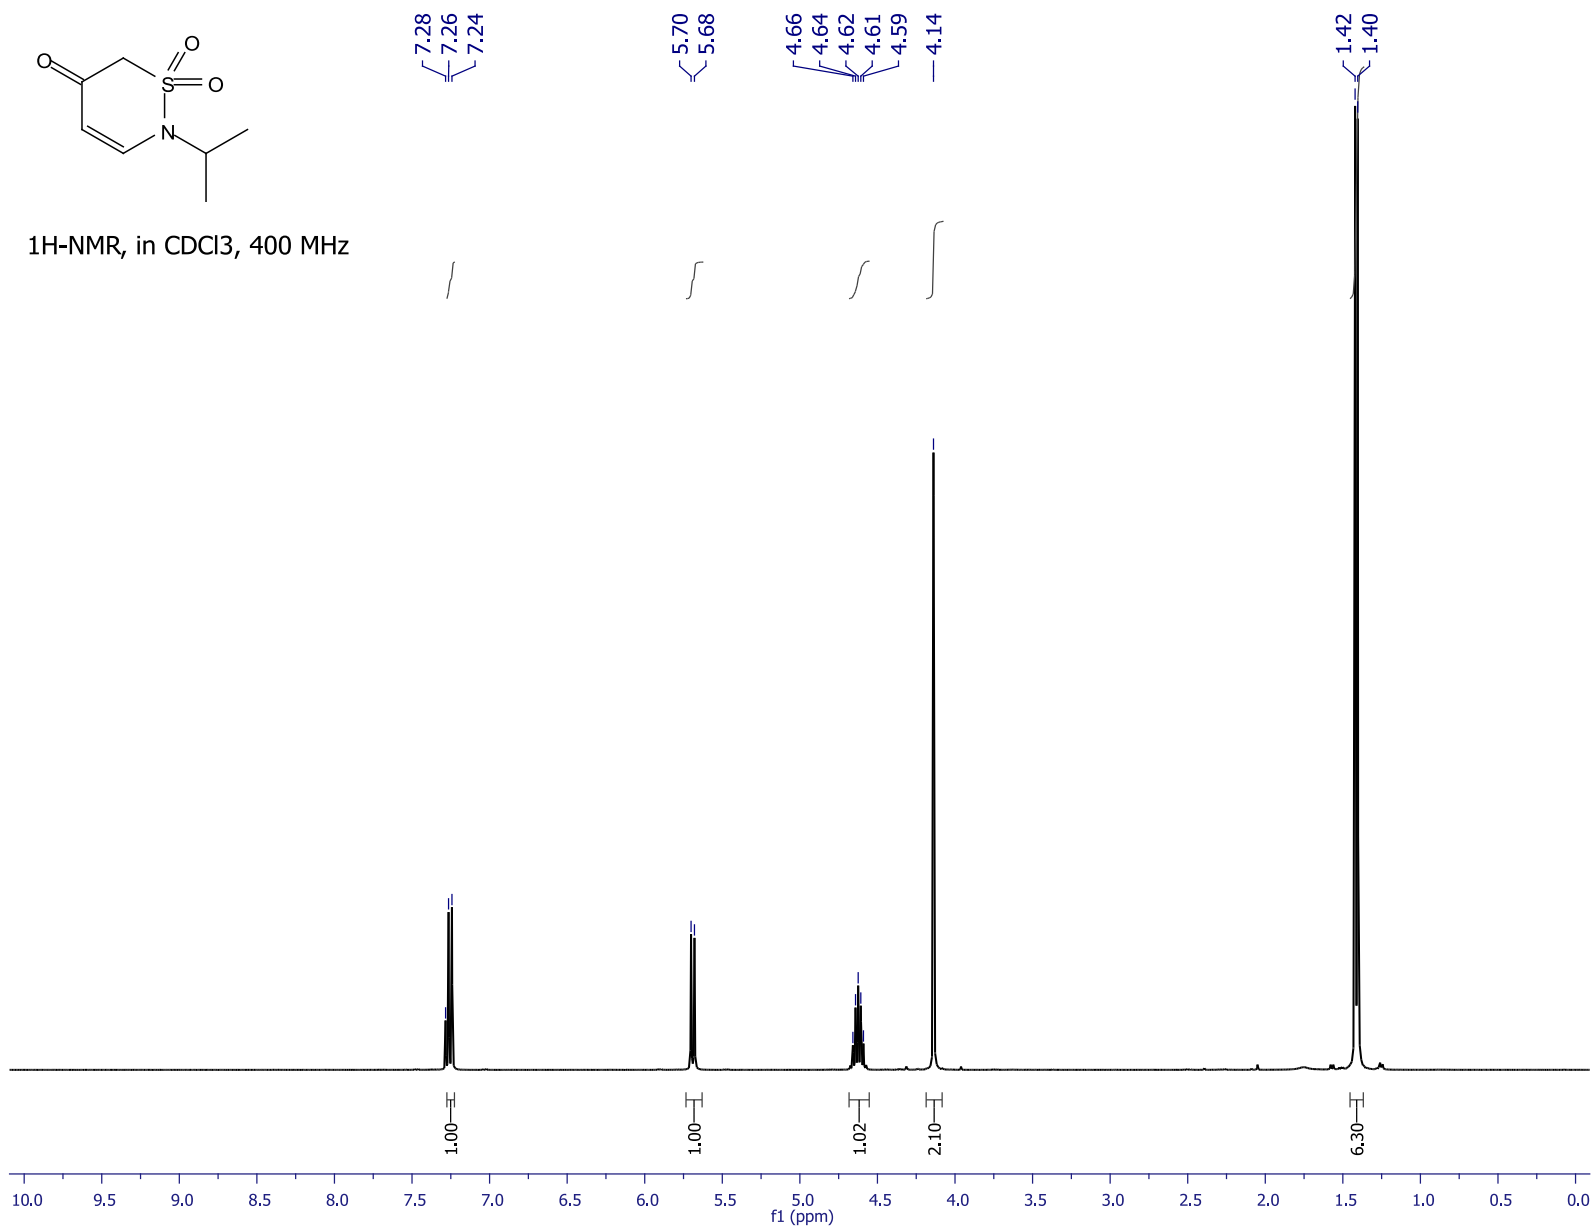



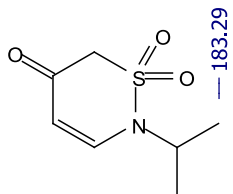

$^{13}\text{C-NMR}$ , in  $\text{CDCl}_3$ , 100 MHz

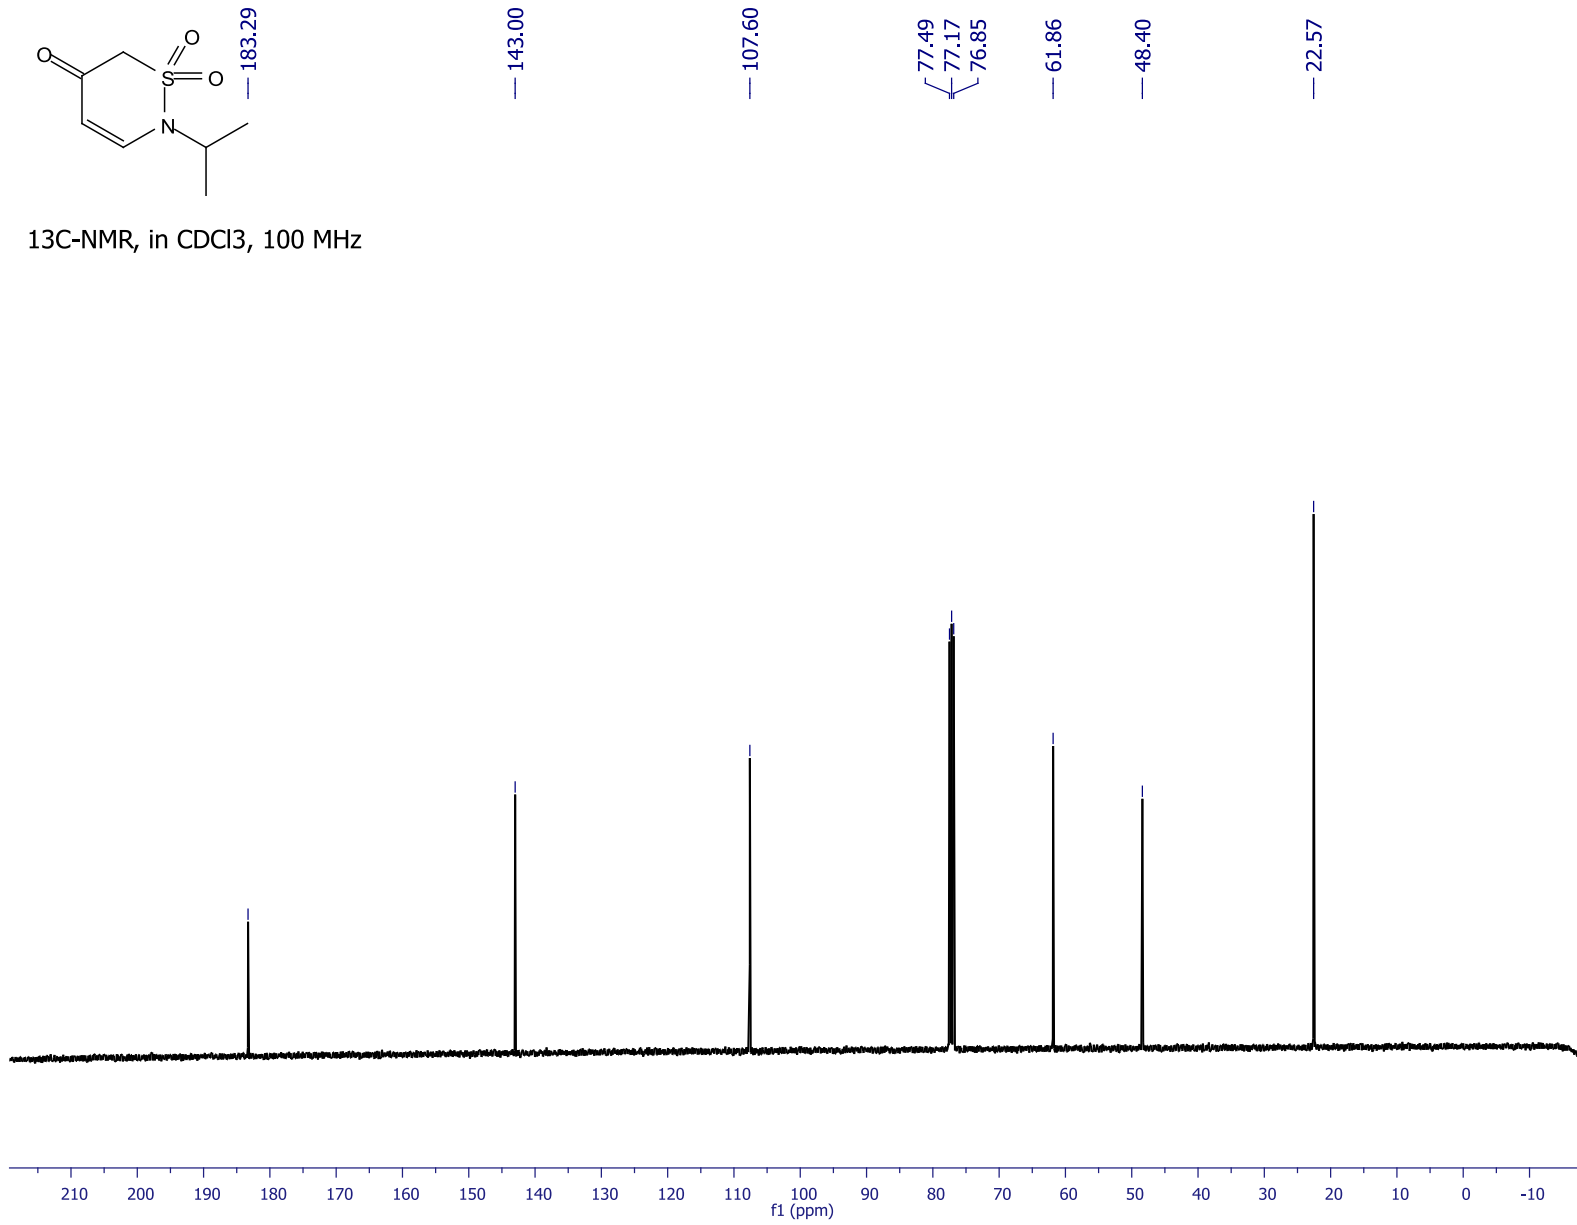

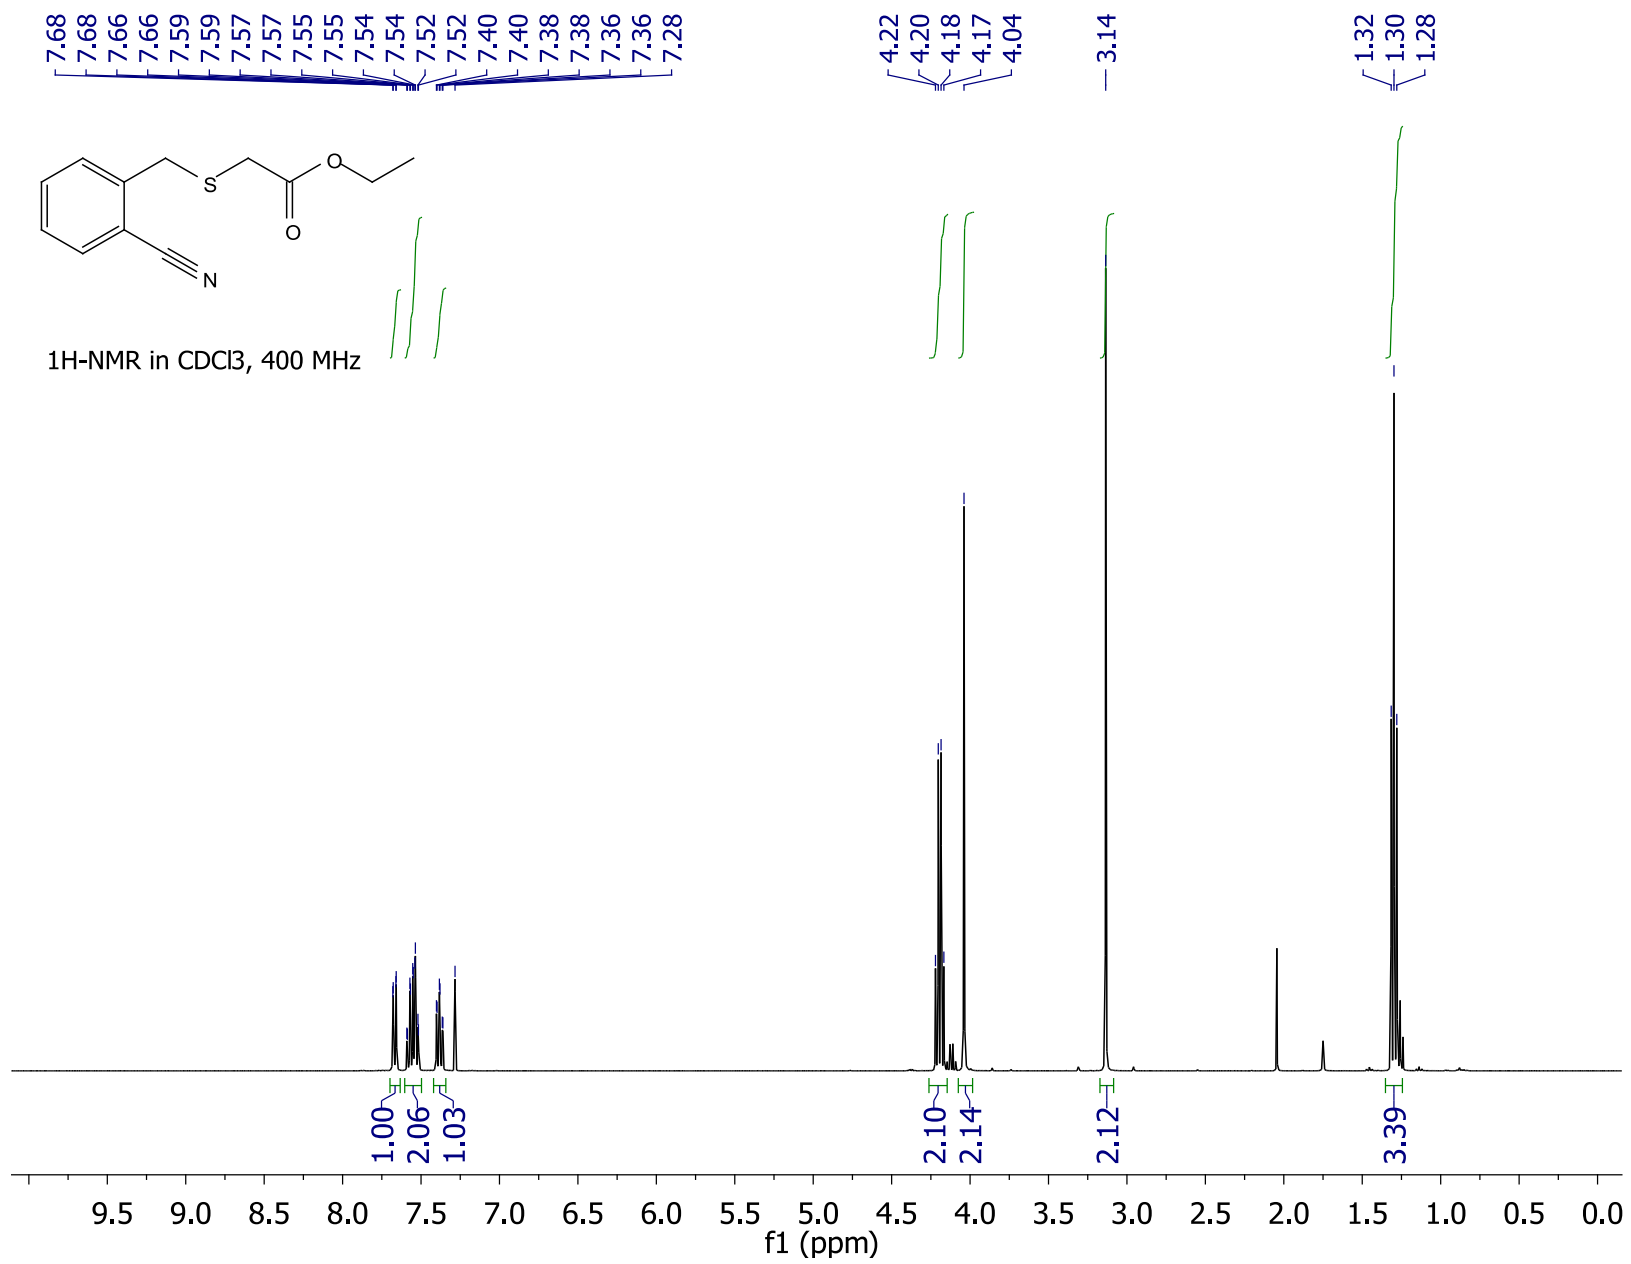

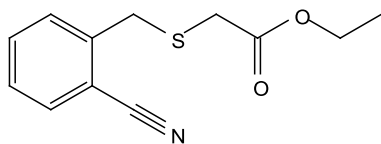

— 169.94

— 141.34

— 133.30

— 132.76

— 130.31

— 127.87

— 117.38

— 112.79

— 77.42

— 77.10

— 76.78

— 61.58

— 34.48

— 32.81

— 14.16

<sup>13</sup>C-NMR in CDCl<sub>3</sub>, 100 MHz

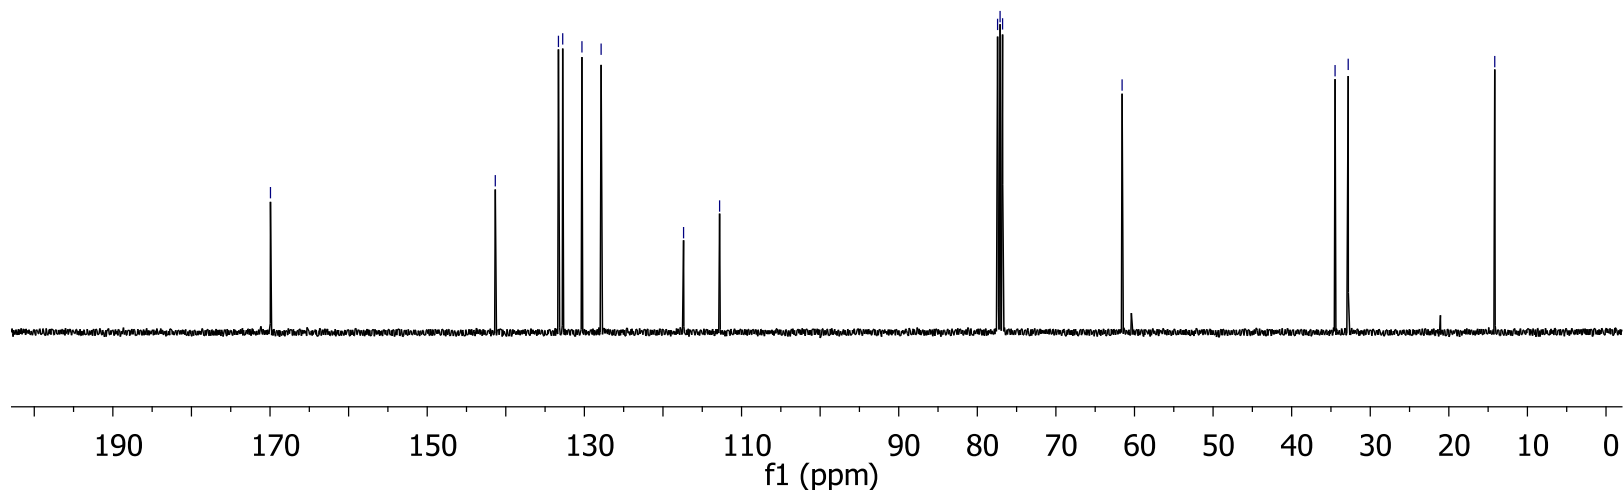

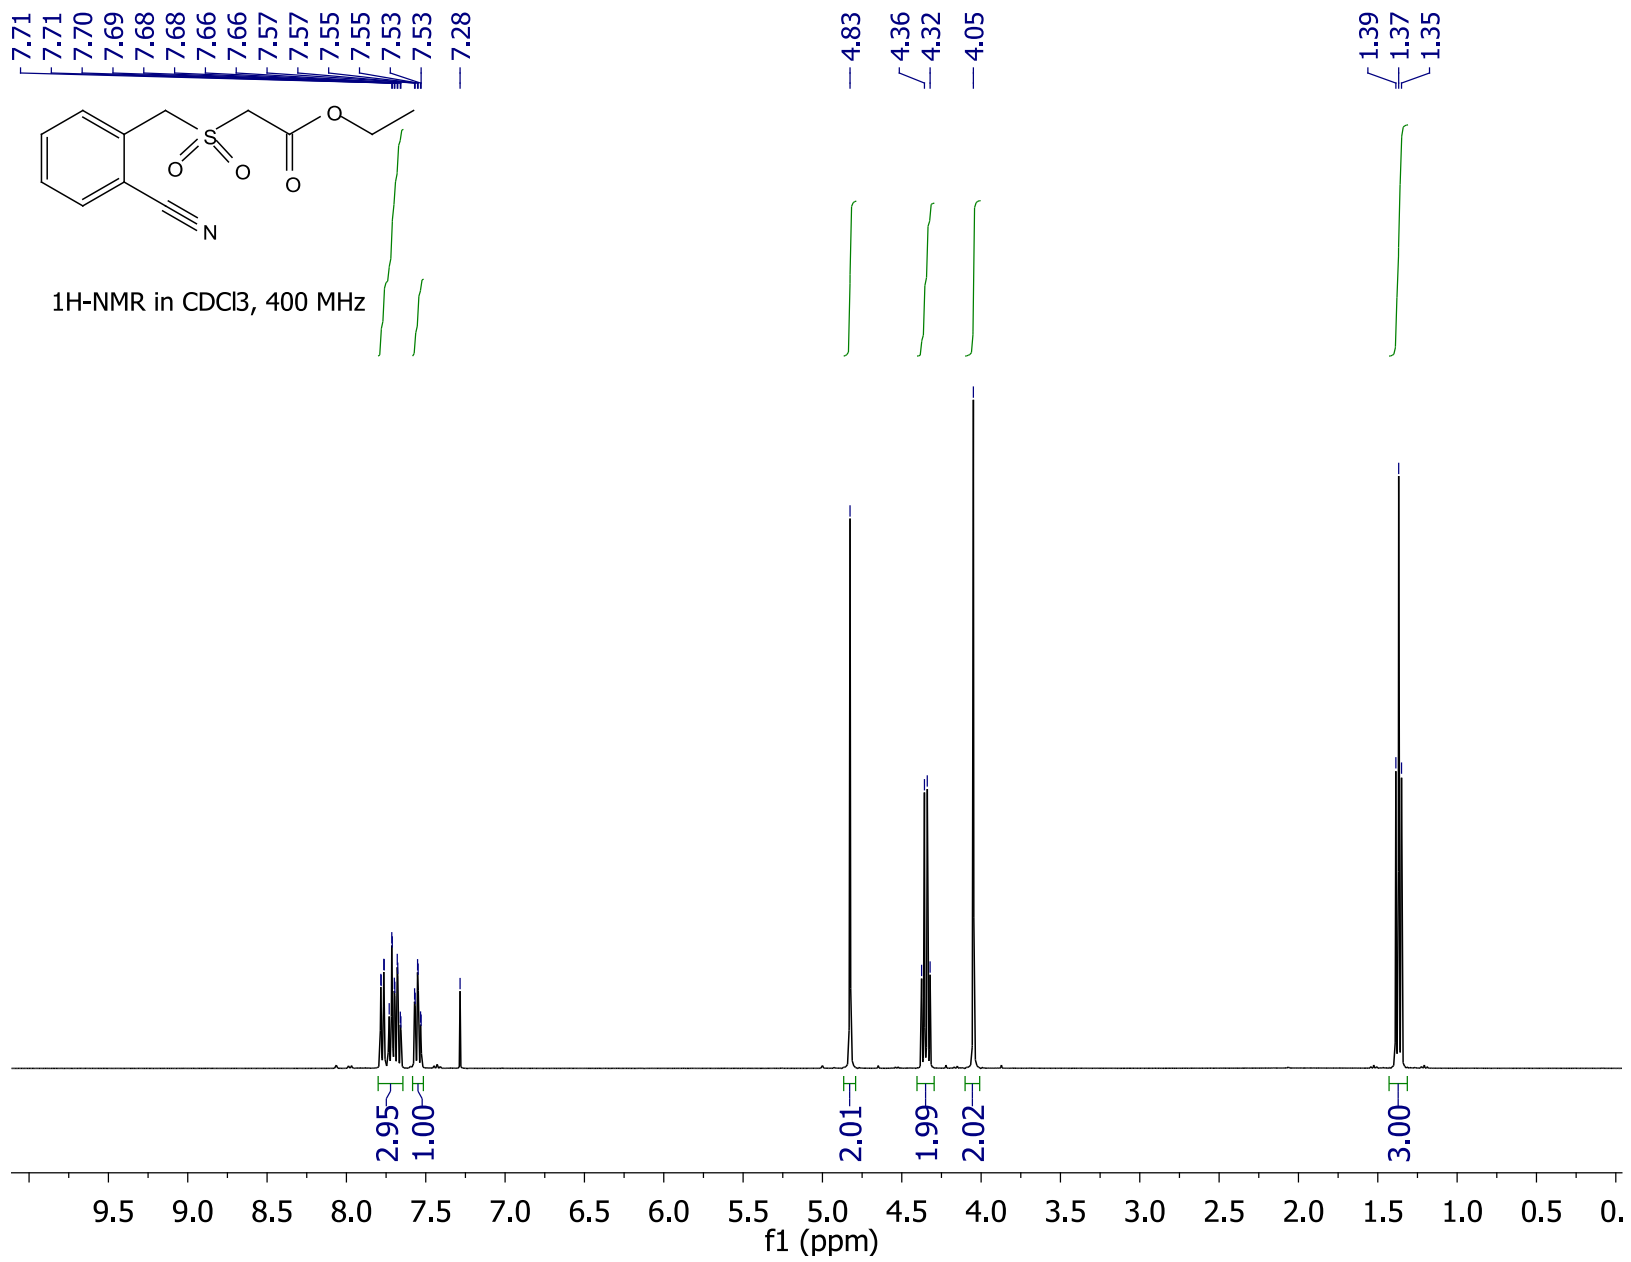

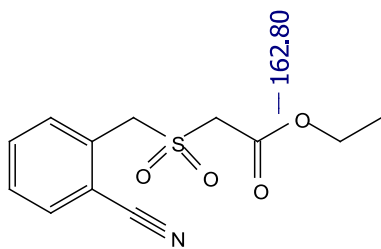

<sup>13</sup>C-NMR in CDCl<sub>3</sub>, 100 MHz

133.58  
133.23  
132.34  
130.32  
129.83  
117.11  
115.00

77.40  
77.08  
76.76

63.09  
57.59  
57.15

14.00

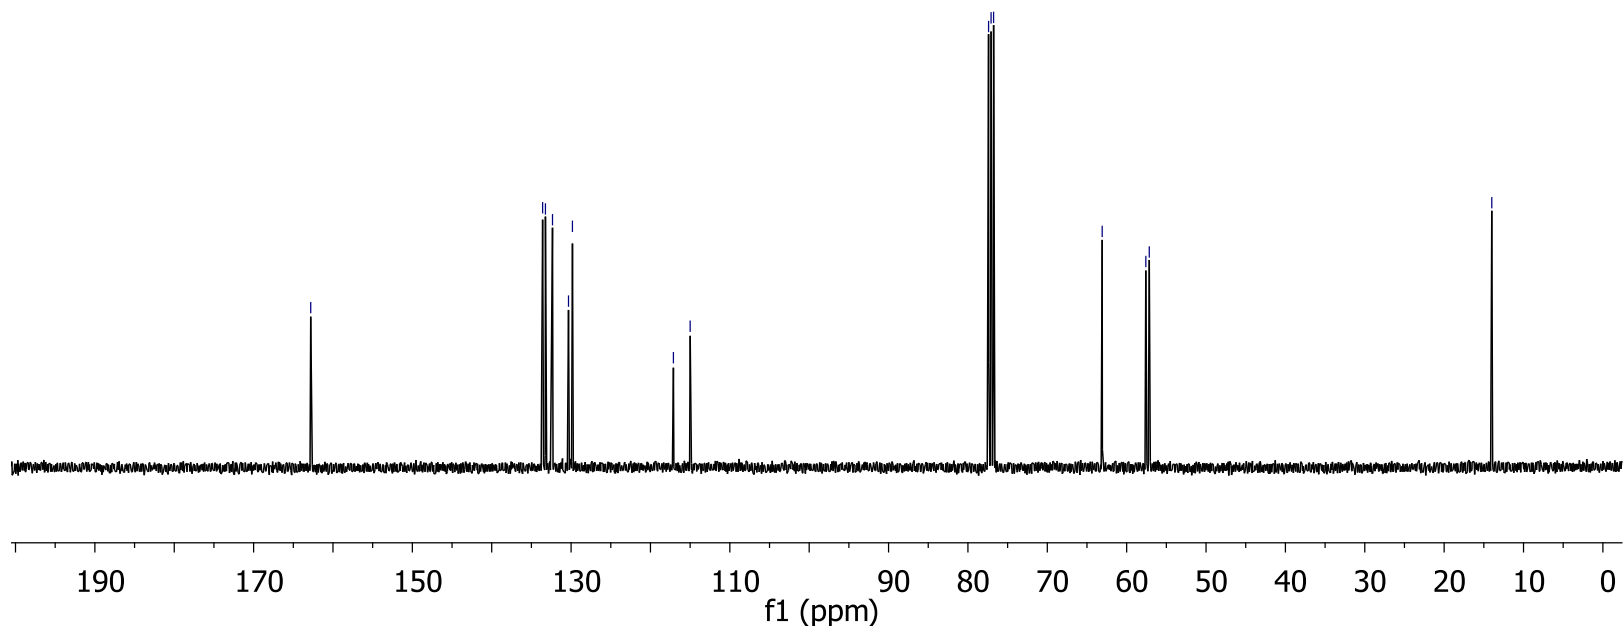

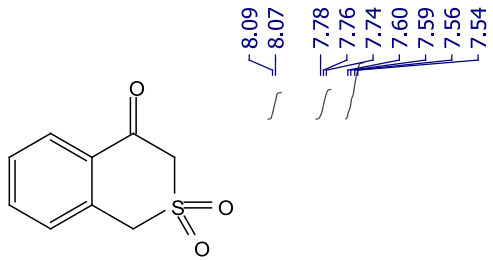

<sup>1</sup>H-NMR in DMSO-d<sub>6</sub>, 400 MHz

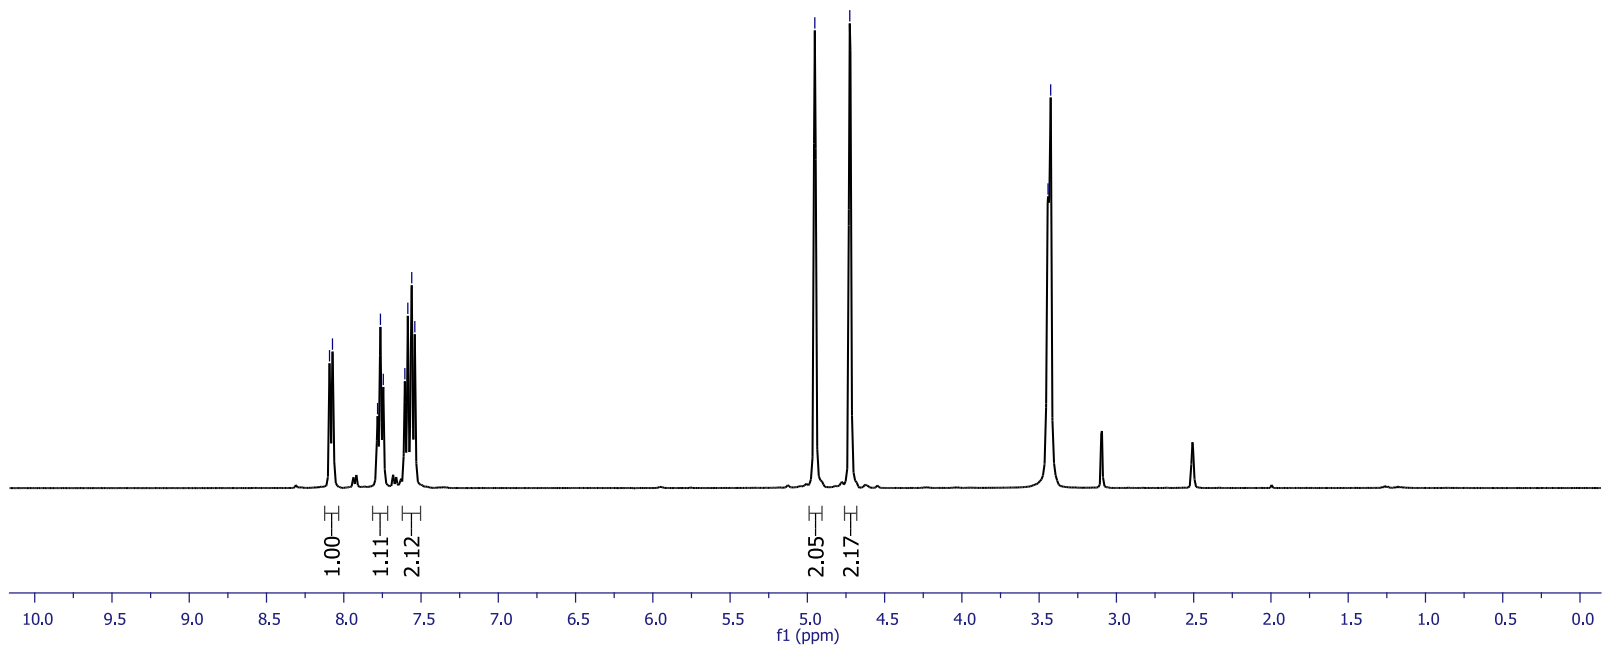

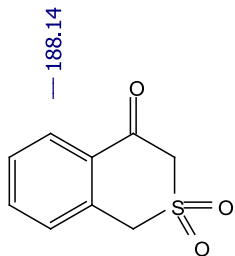

<sup>13</sup>C-NMR in DMSO-d<sub>6</sub>, 100 MHz

134.98  
134.22  
130.47  
130.43  
128.79  
128.05

61.81  
53.96  
40.04  
39.83  
39.62  
39.41  
39.20  
38.99  
38.78

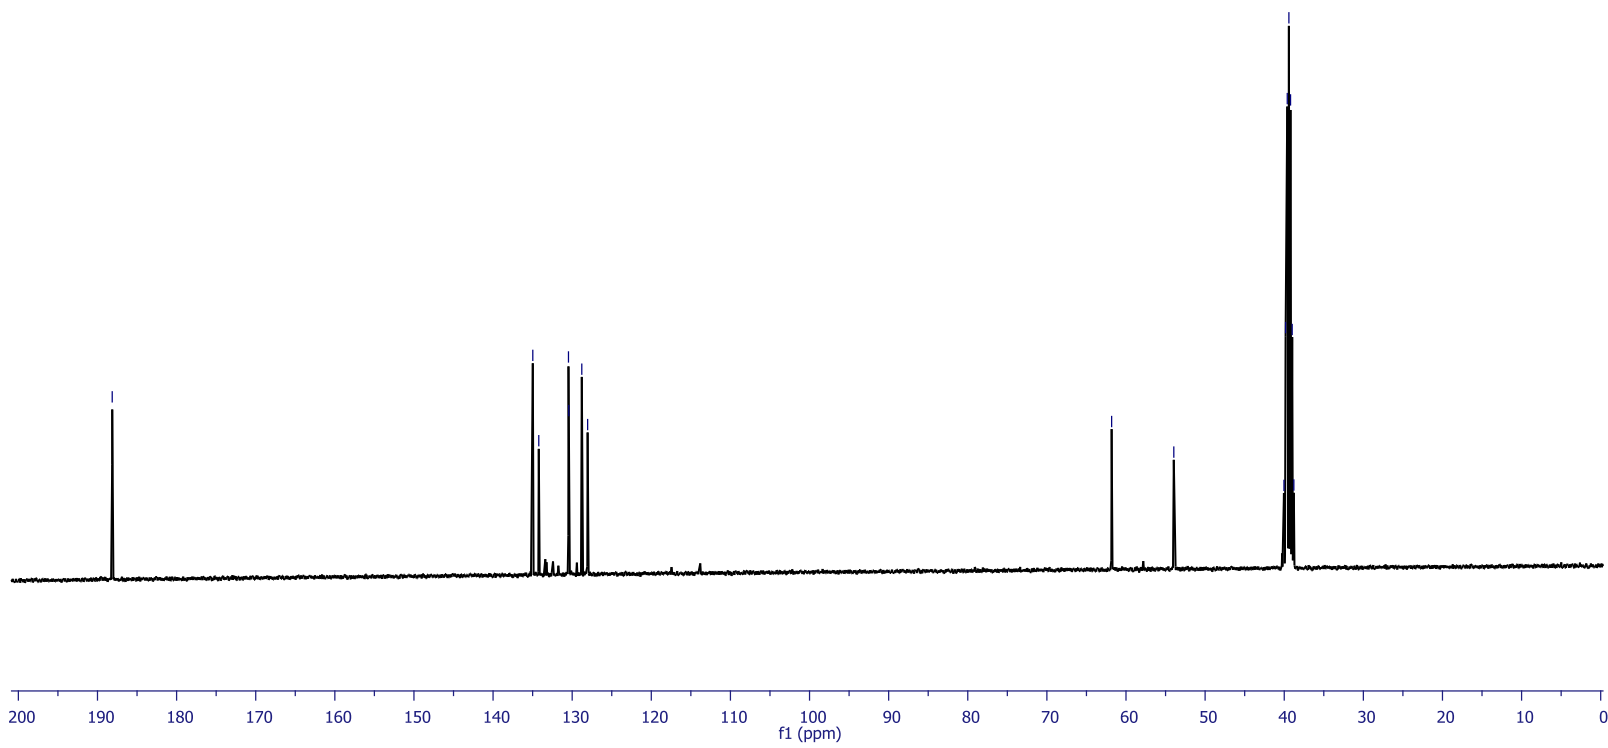

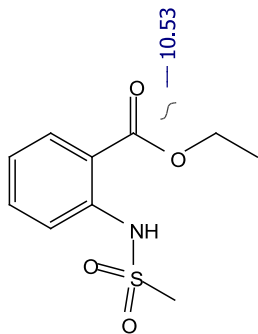

<sup>1</sup>HNMR, in CDCl<sub>3</sub>, 400 MHz

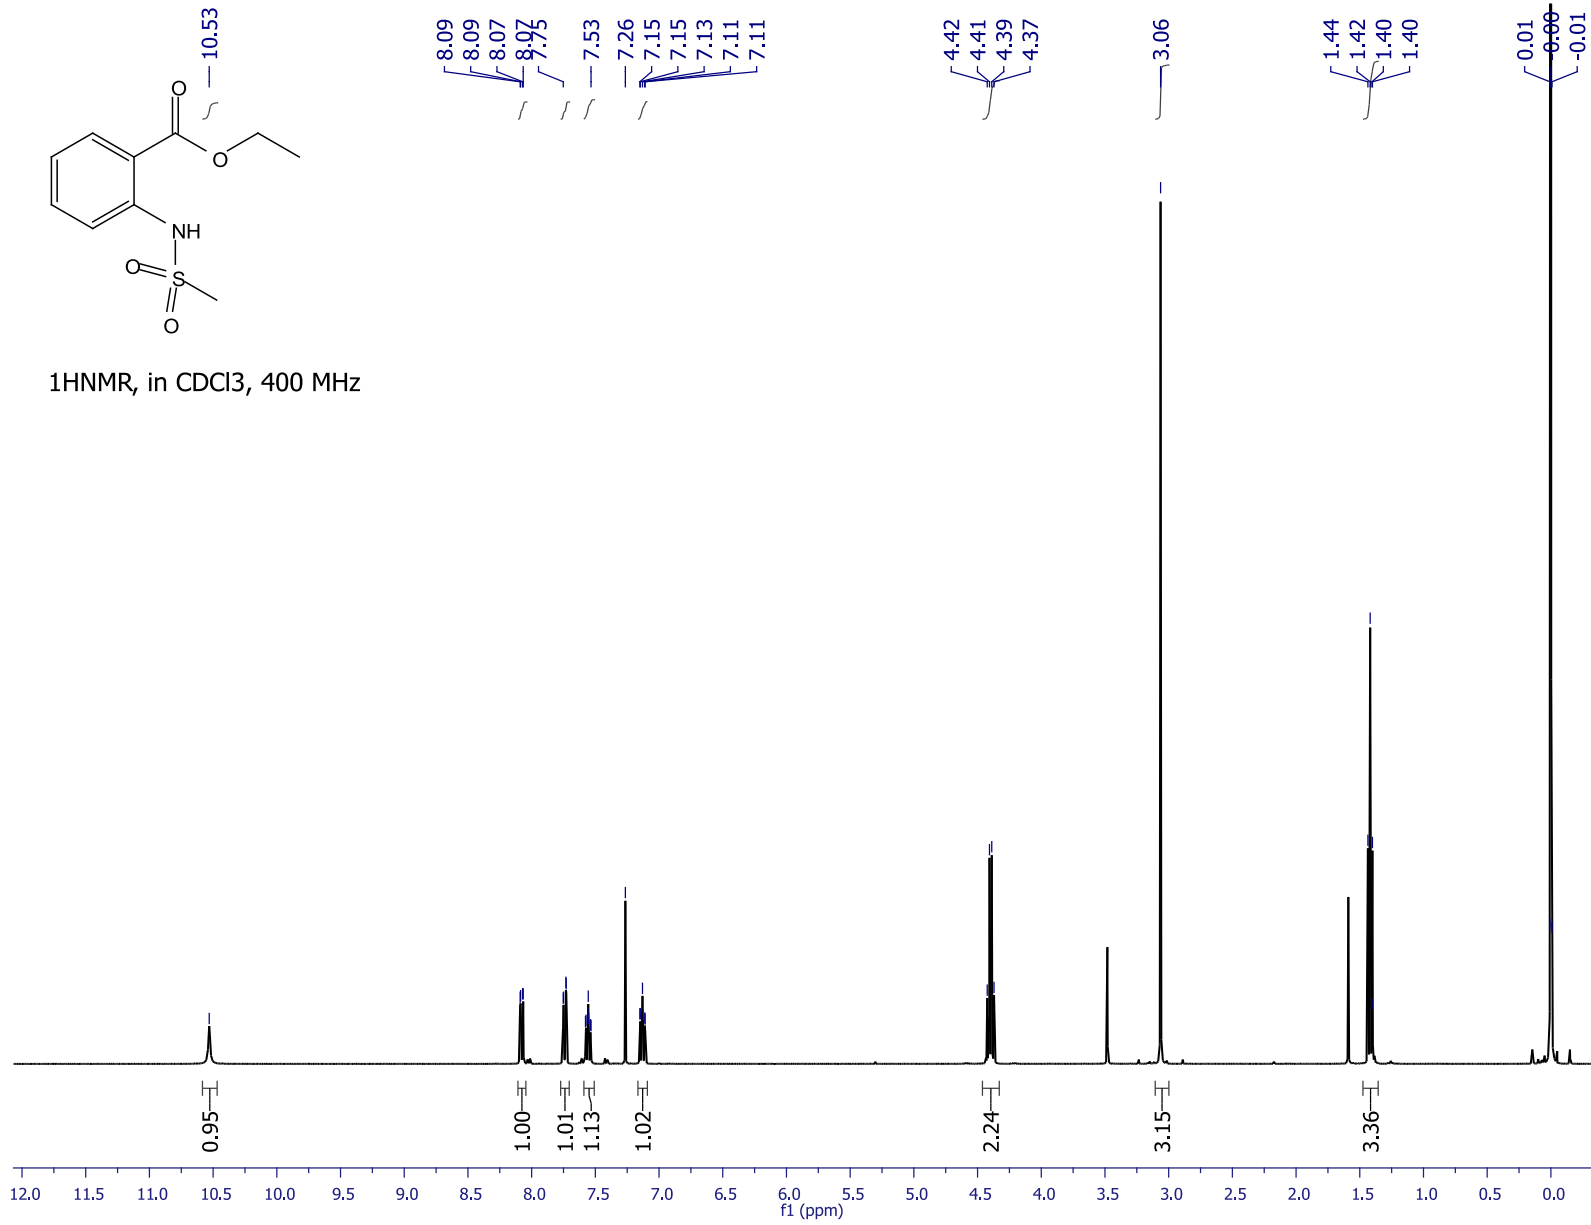



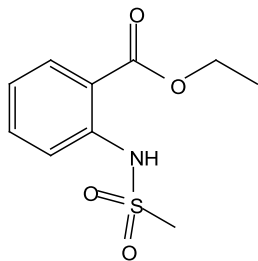

<sup>13</sup>C-NMR, in CDCl<sub>3</sub>, 100 MHz

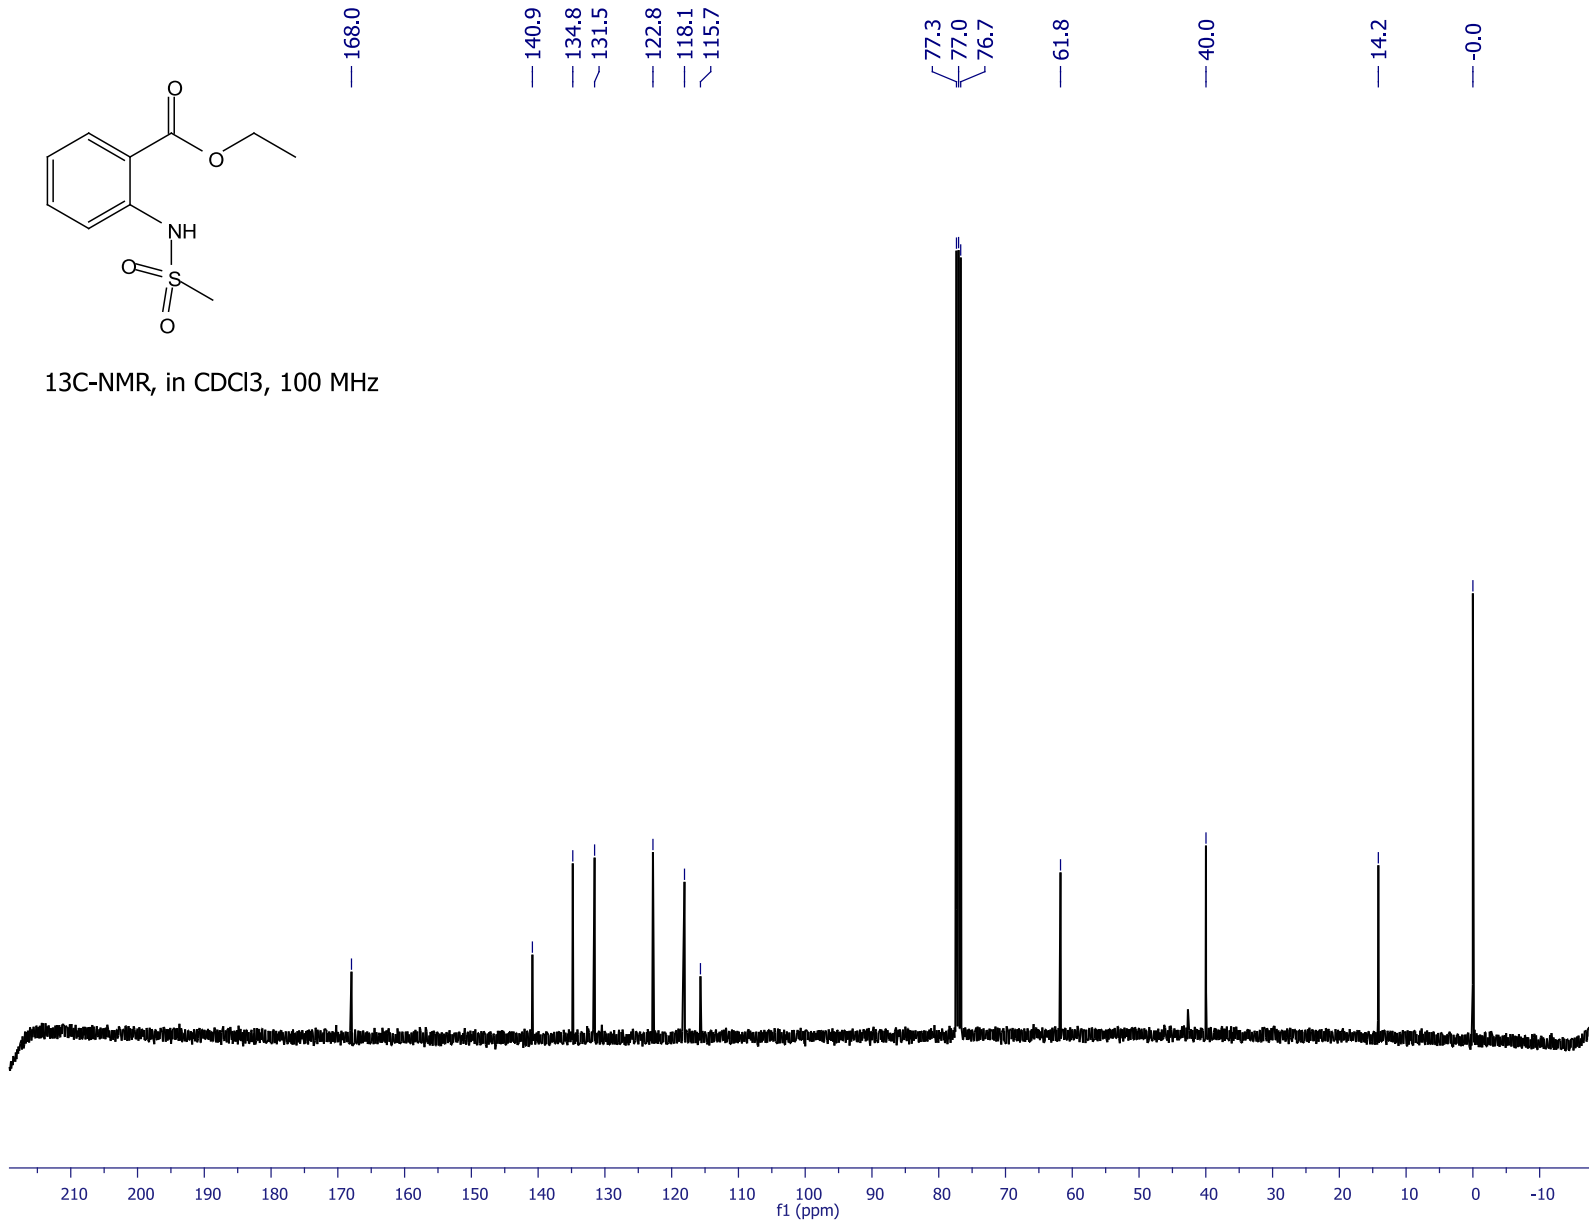

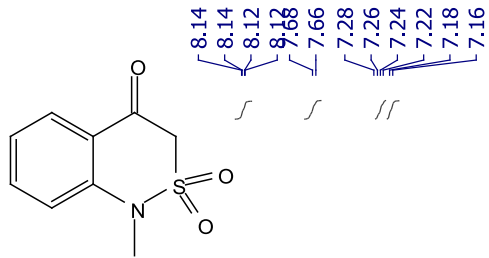

<sup>1</sup>H-NMR, in CDCl<sub>3</sub>, 400 MHz

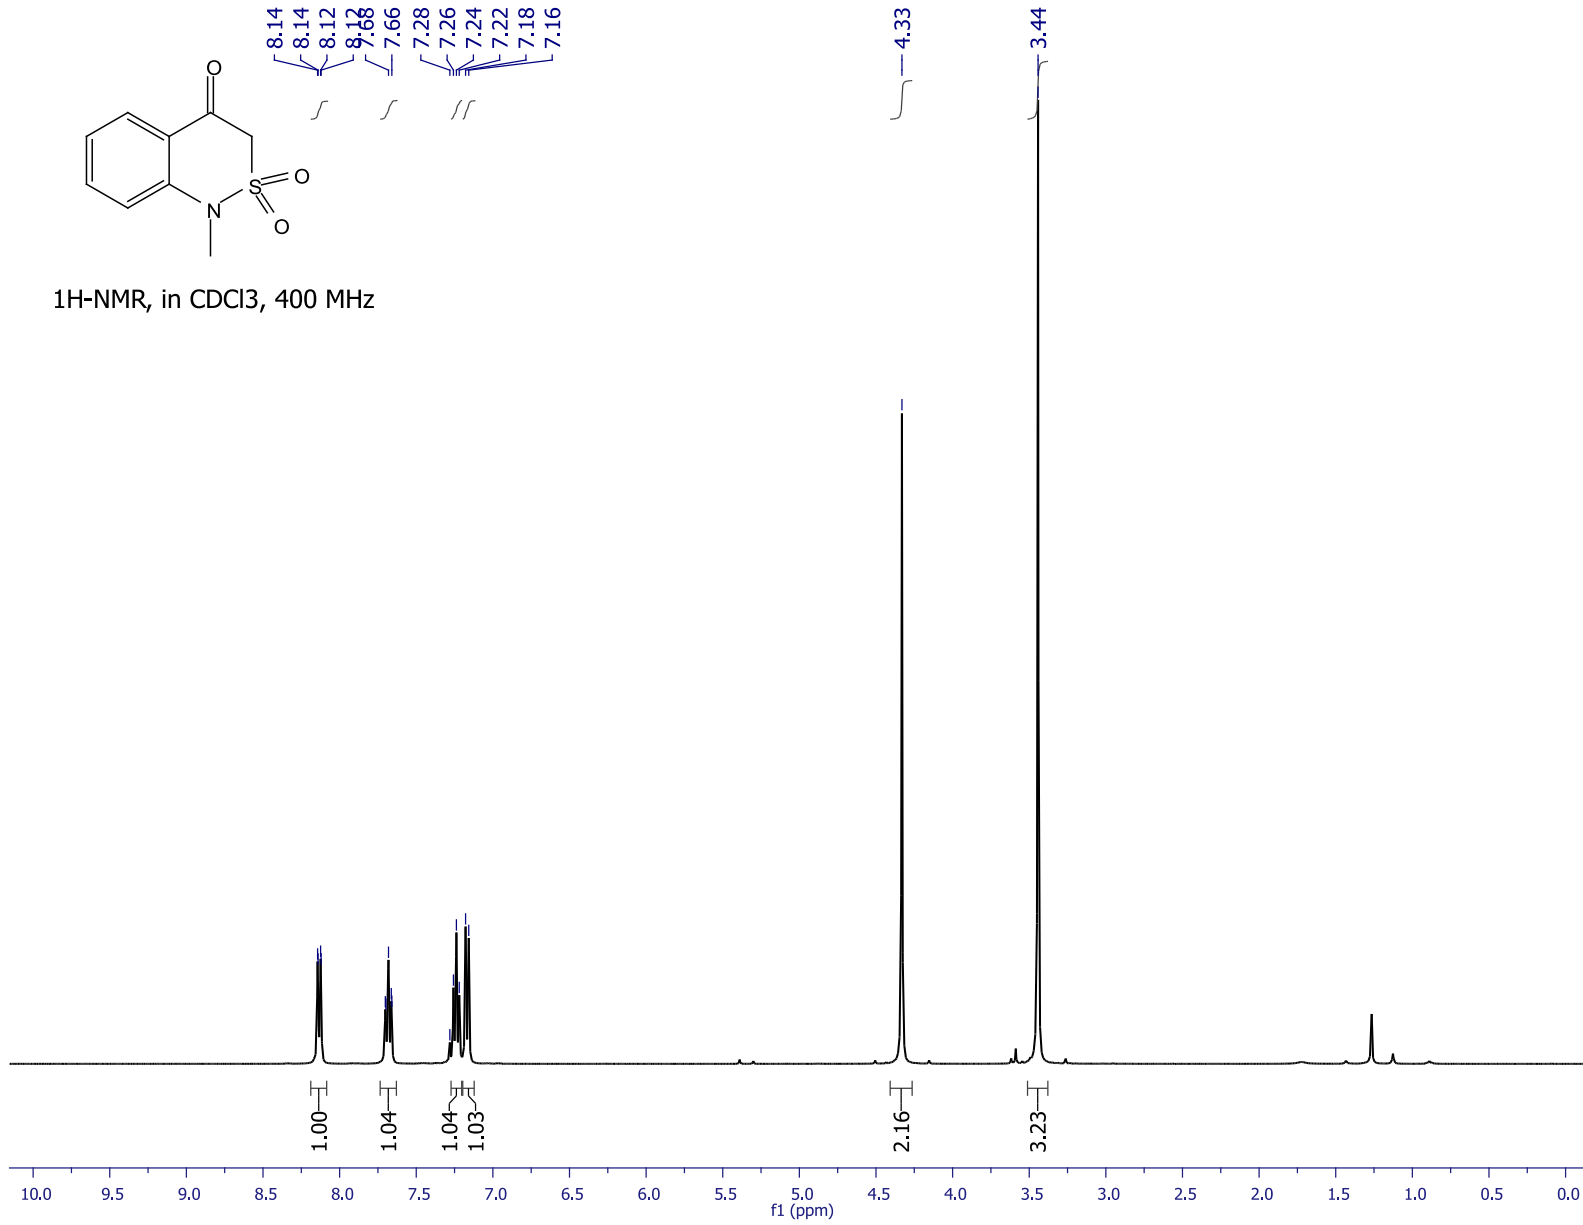

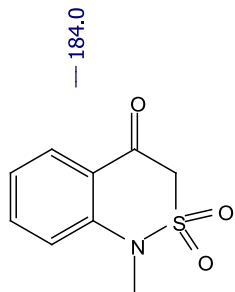

$^{13}\text{C}$ -NMR, in  $\text{CDCl}_3$ , 100 MHz

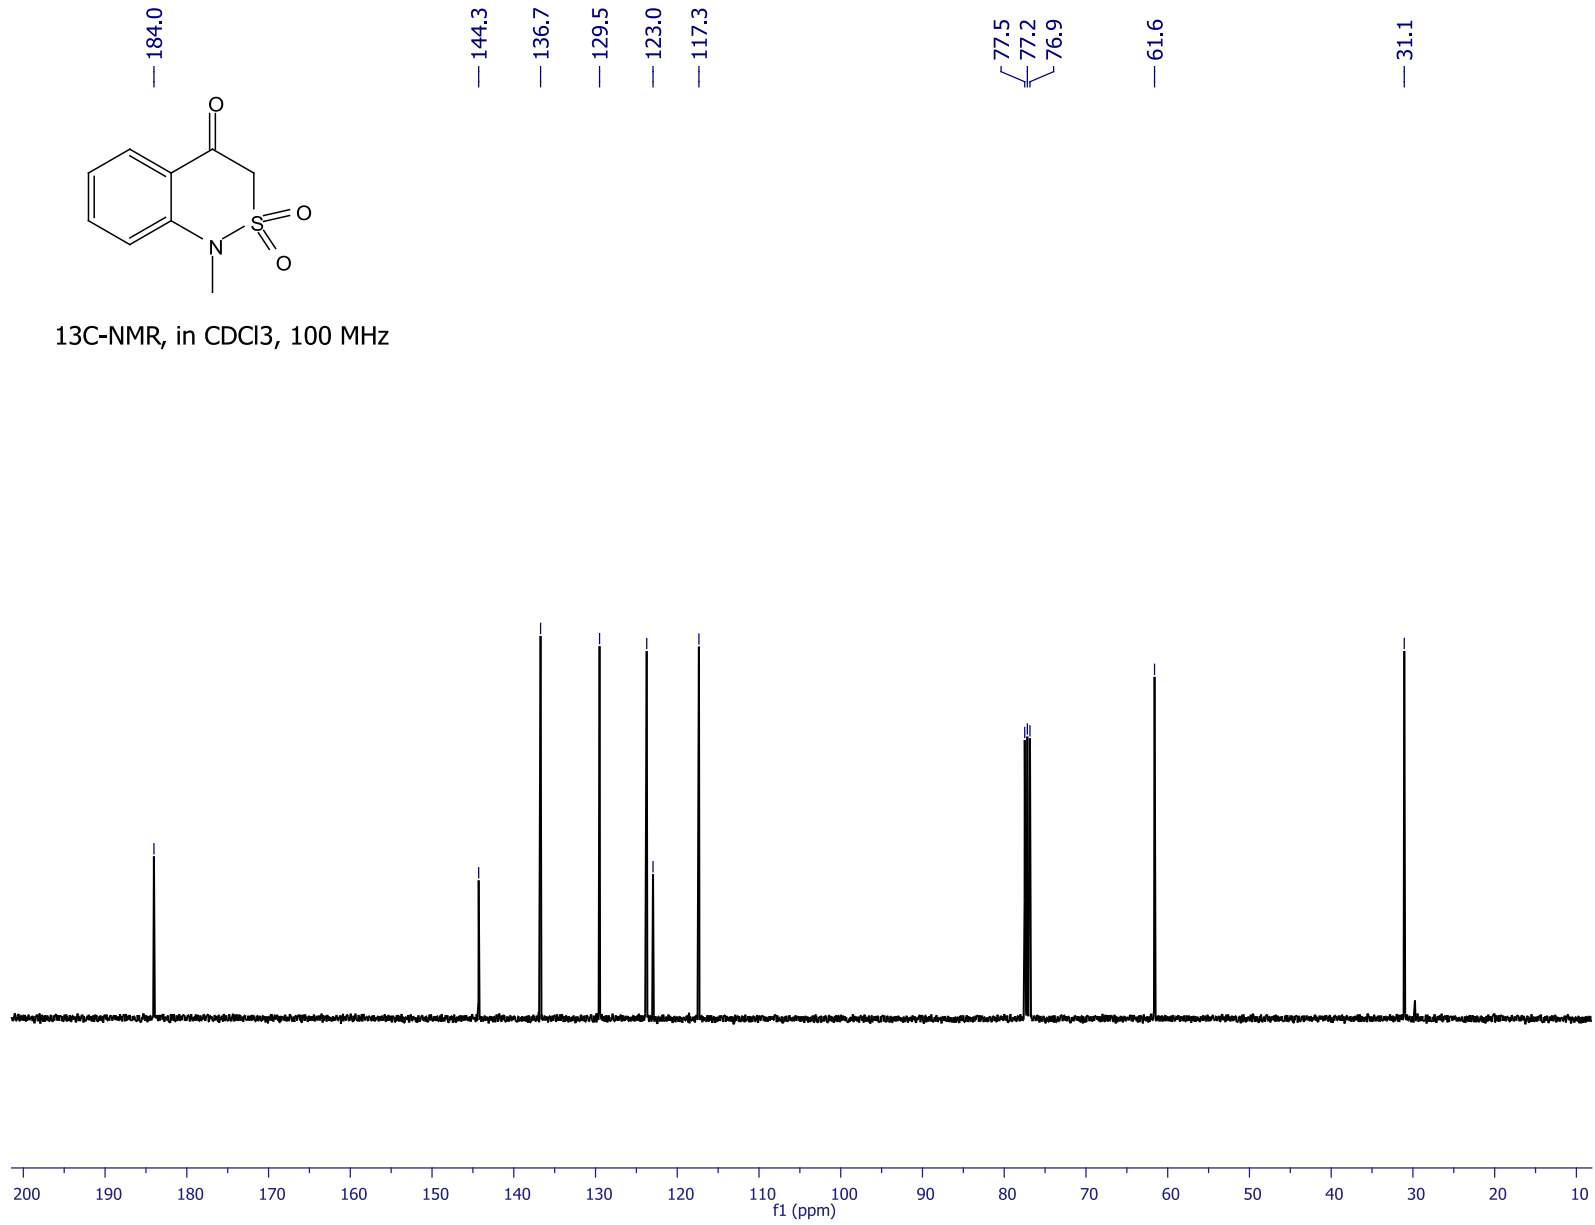

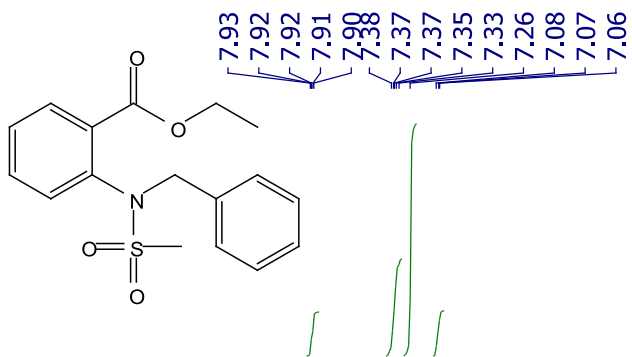

<sup>1</sup>H-NMR, in CDCl<sub>3</sub>, 400 MHz

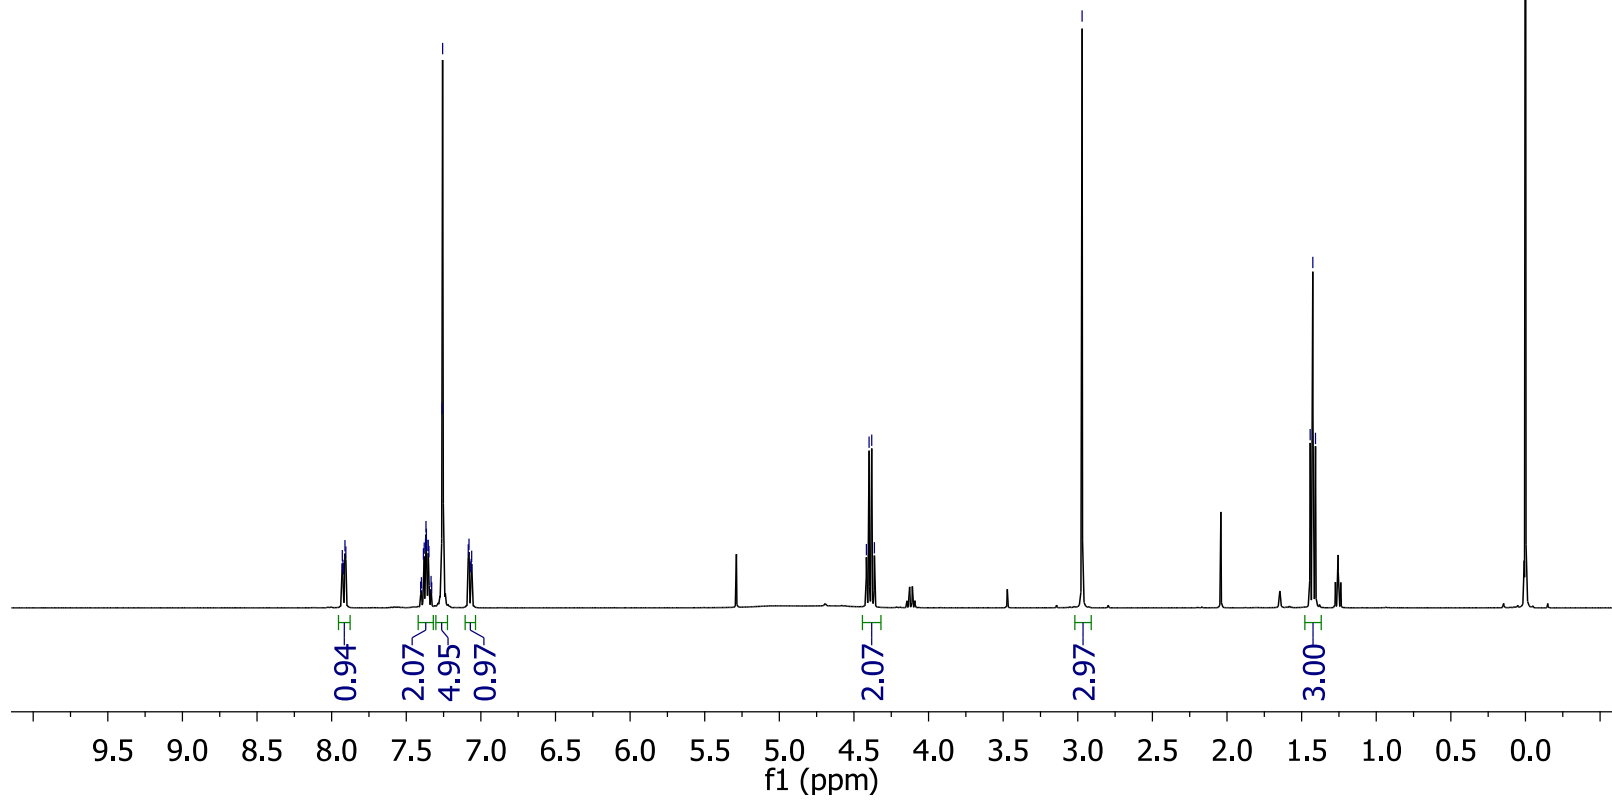

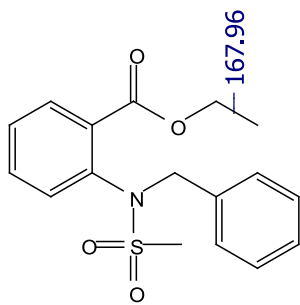

- 140.86
- 134.81
- 131.54
- 122.80
- 118.08
- 115.69
- 77.34
- 77.03
- 76.71
- 61.76
- 39.97
- 14.16
- 0.00

<sup>13</sup>H-NMR, in CDCl<sub>3</sub>, 100 MHz

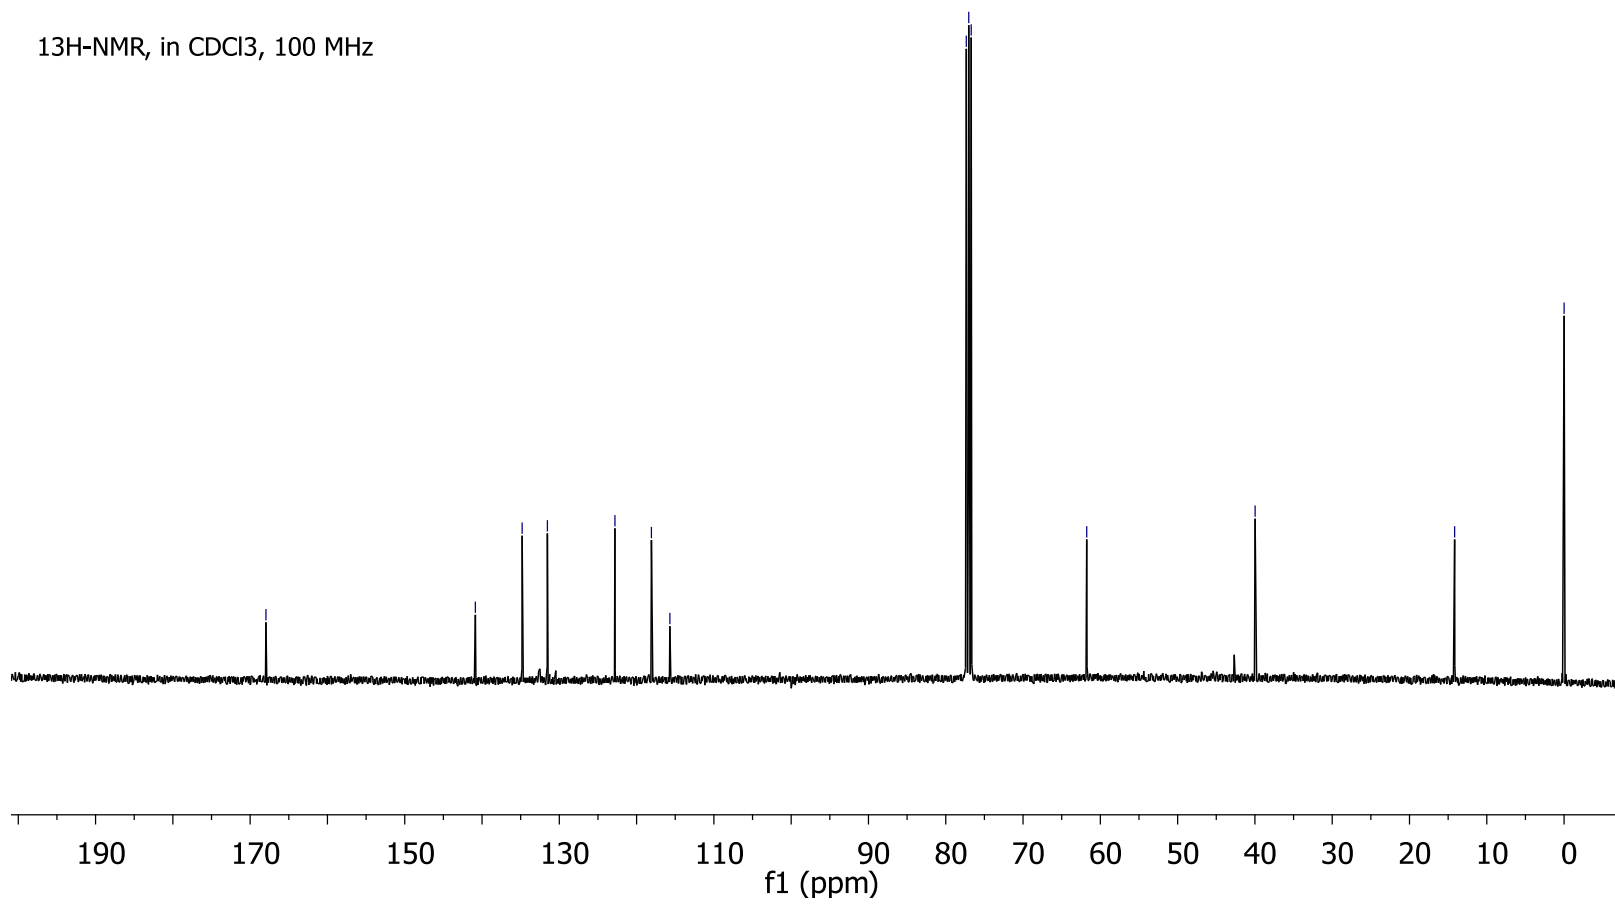

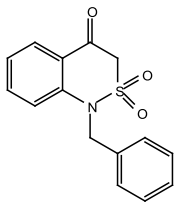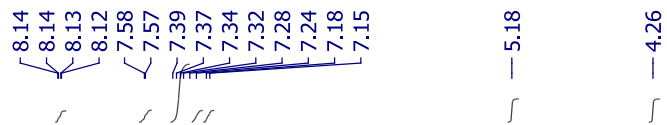

1H-NMR, in CDCl<sub>3</sub>, 400 MHz

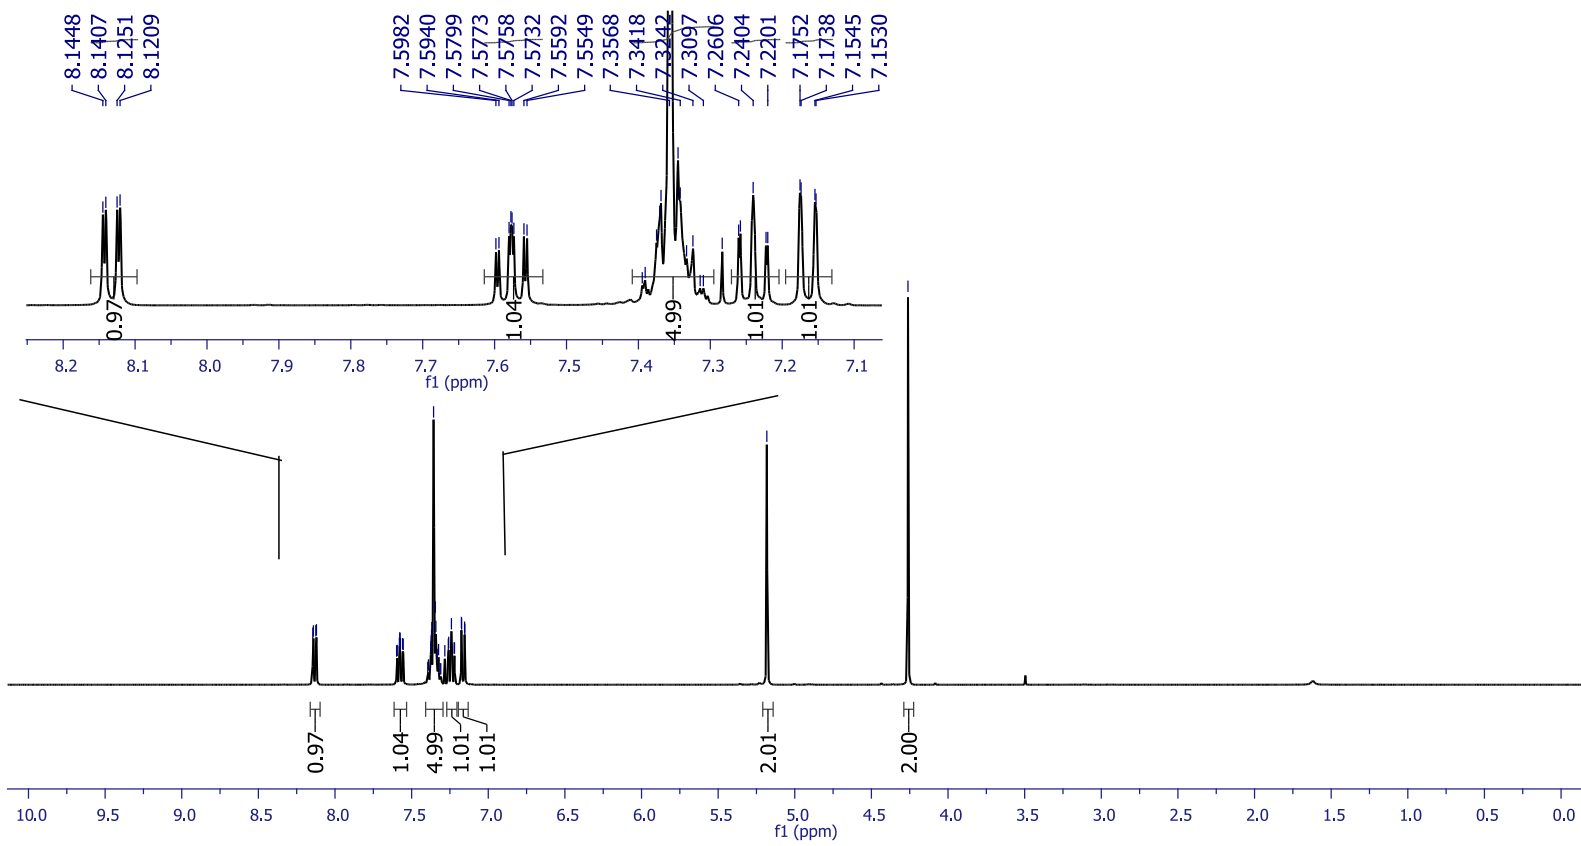

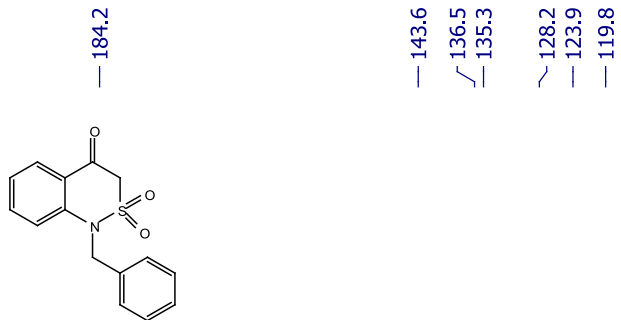

<sup>13</sup>C-NMR, in CDCl<sub>3</sub>, 100 MHz

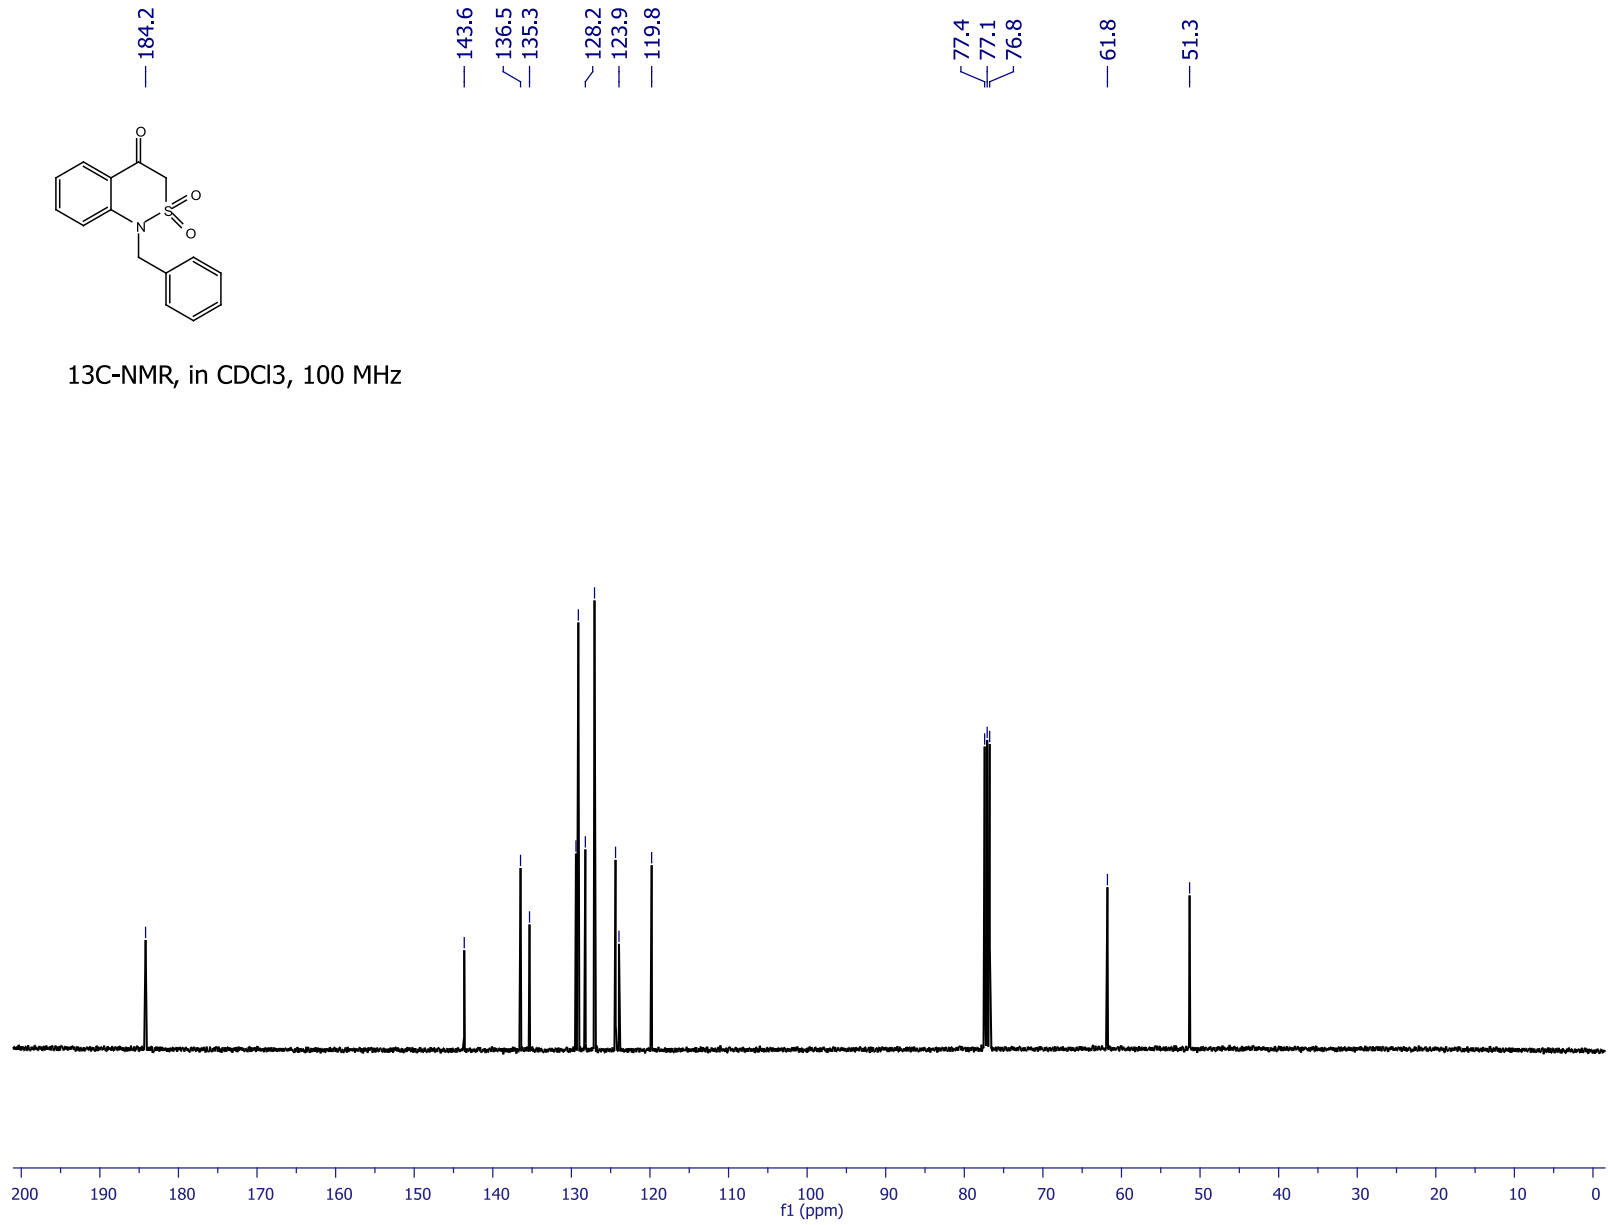

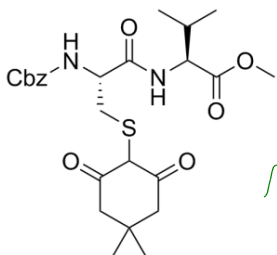

8.23  
8.21  
7.54  
7.52  
7.36  
7.35  
7.33  
7.32  
7.31  
7.29

5.02  
5.02  
4.17  
4.08  
4.07  
4.05  
3.62

2.72  
2.68  
2.65  
2.34  
2.05  
2.03  
2.02

0.97  
0.90  
0.89  
0.88  
0.87

<sup>1</sup>H-NMR in DMSO-d<sub>6</sub>, 400 MHz

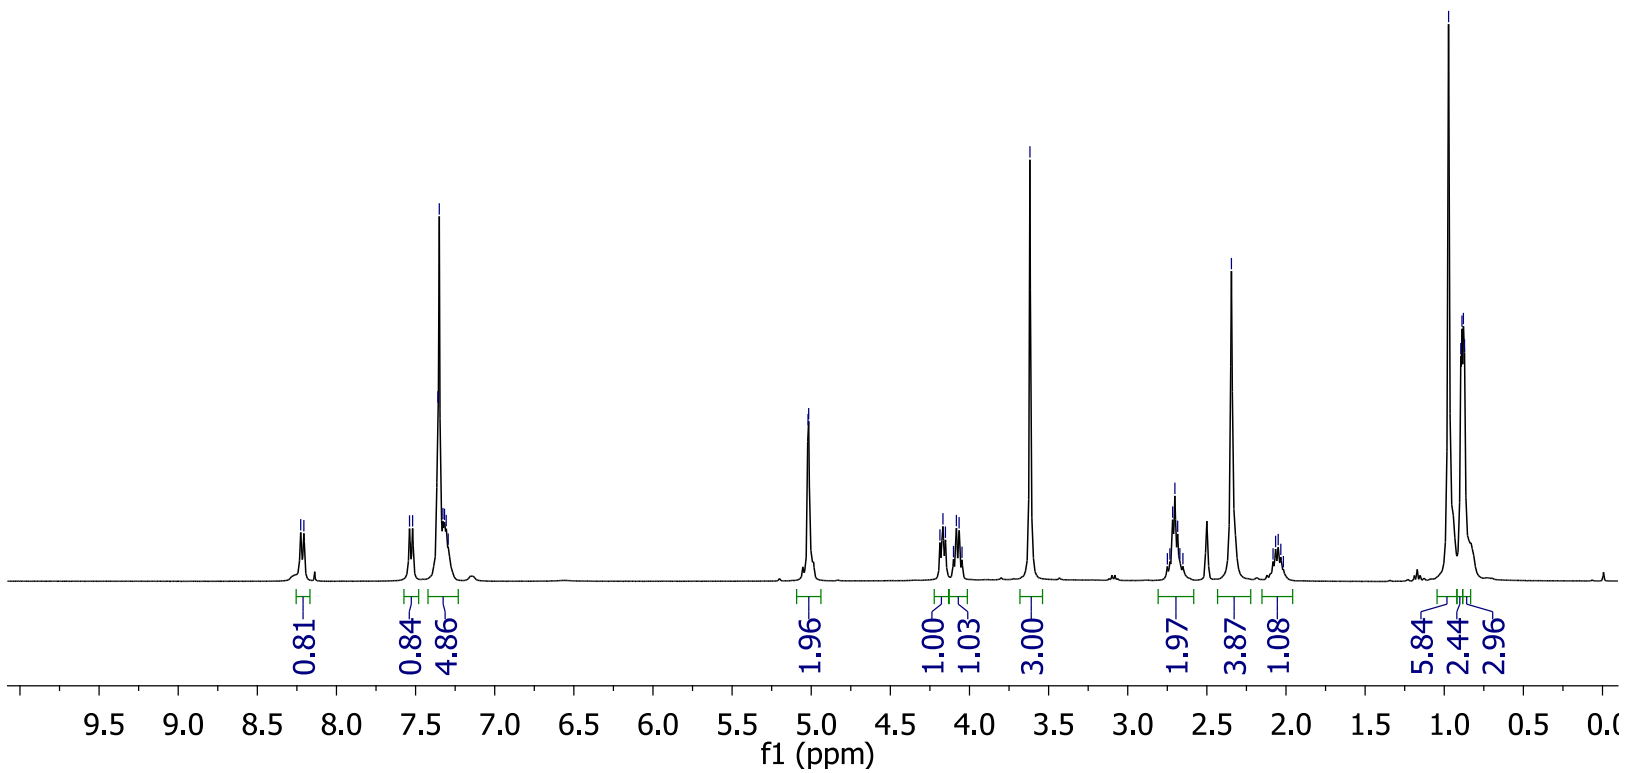



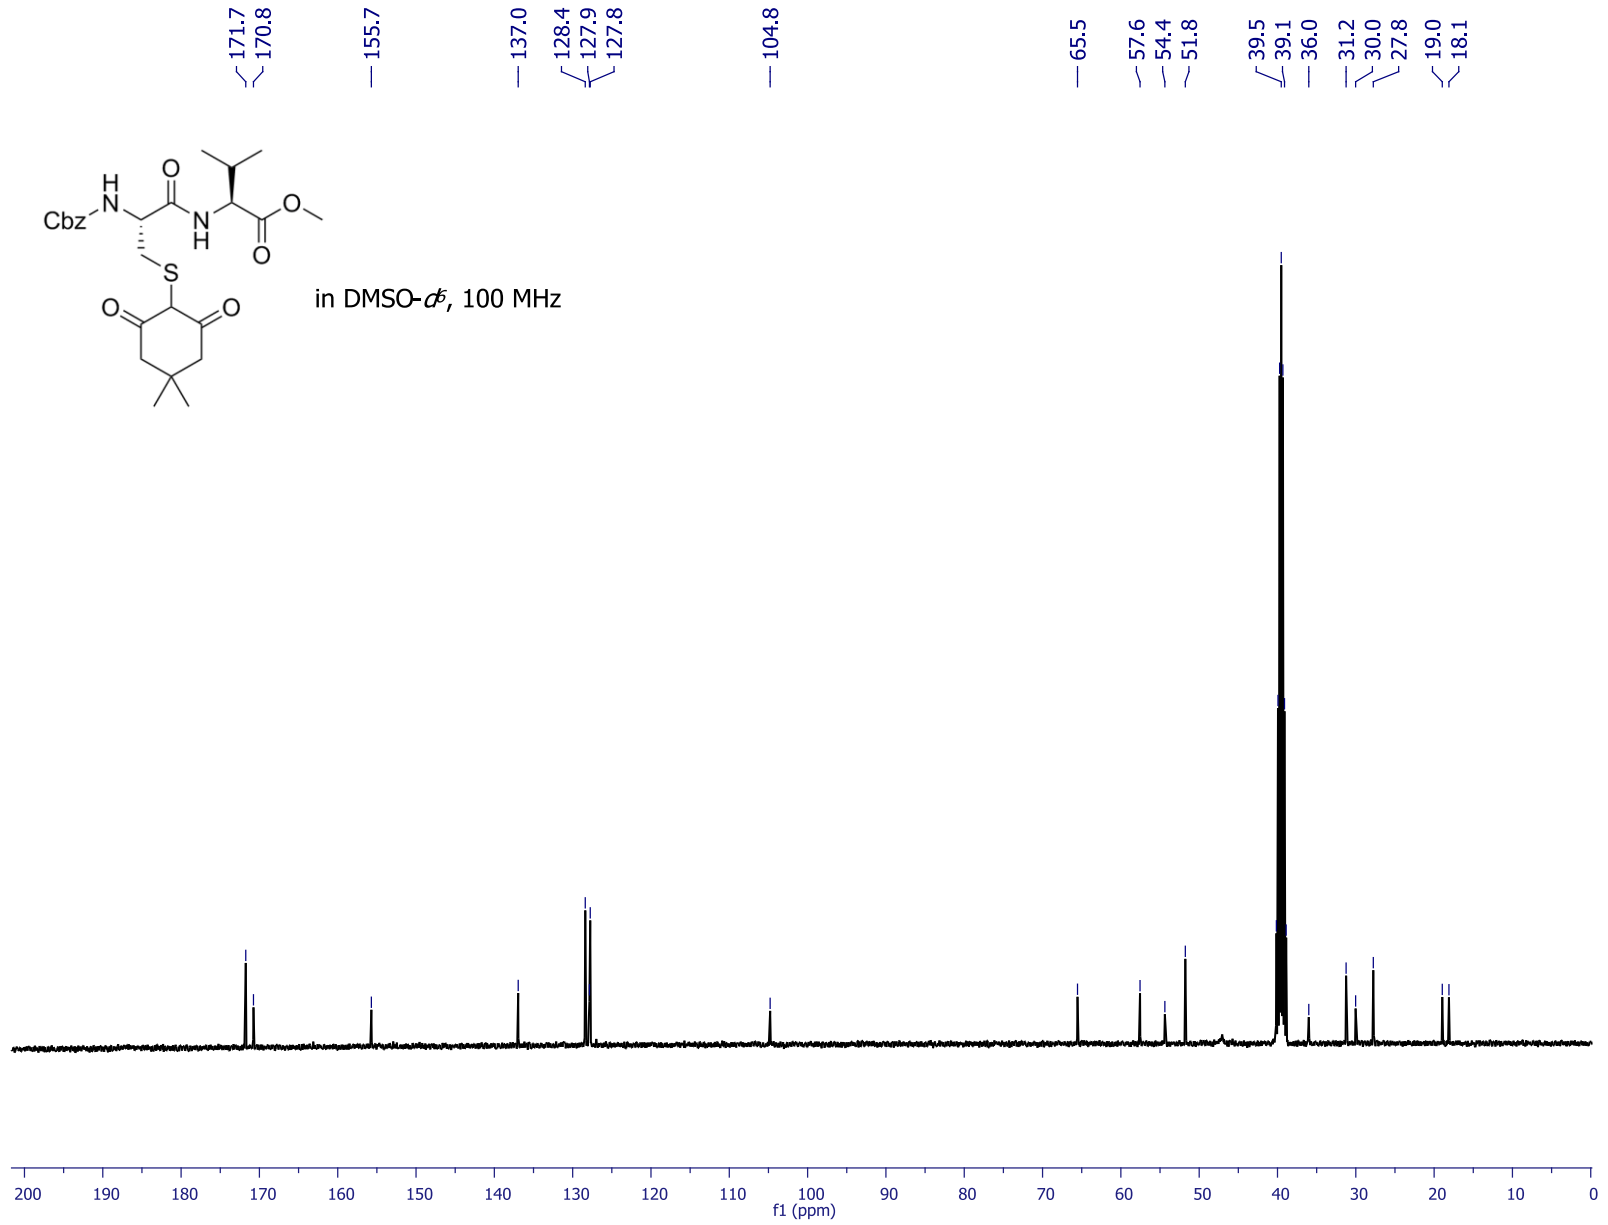

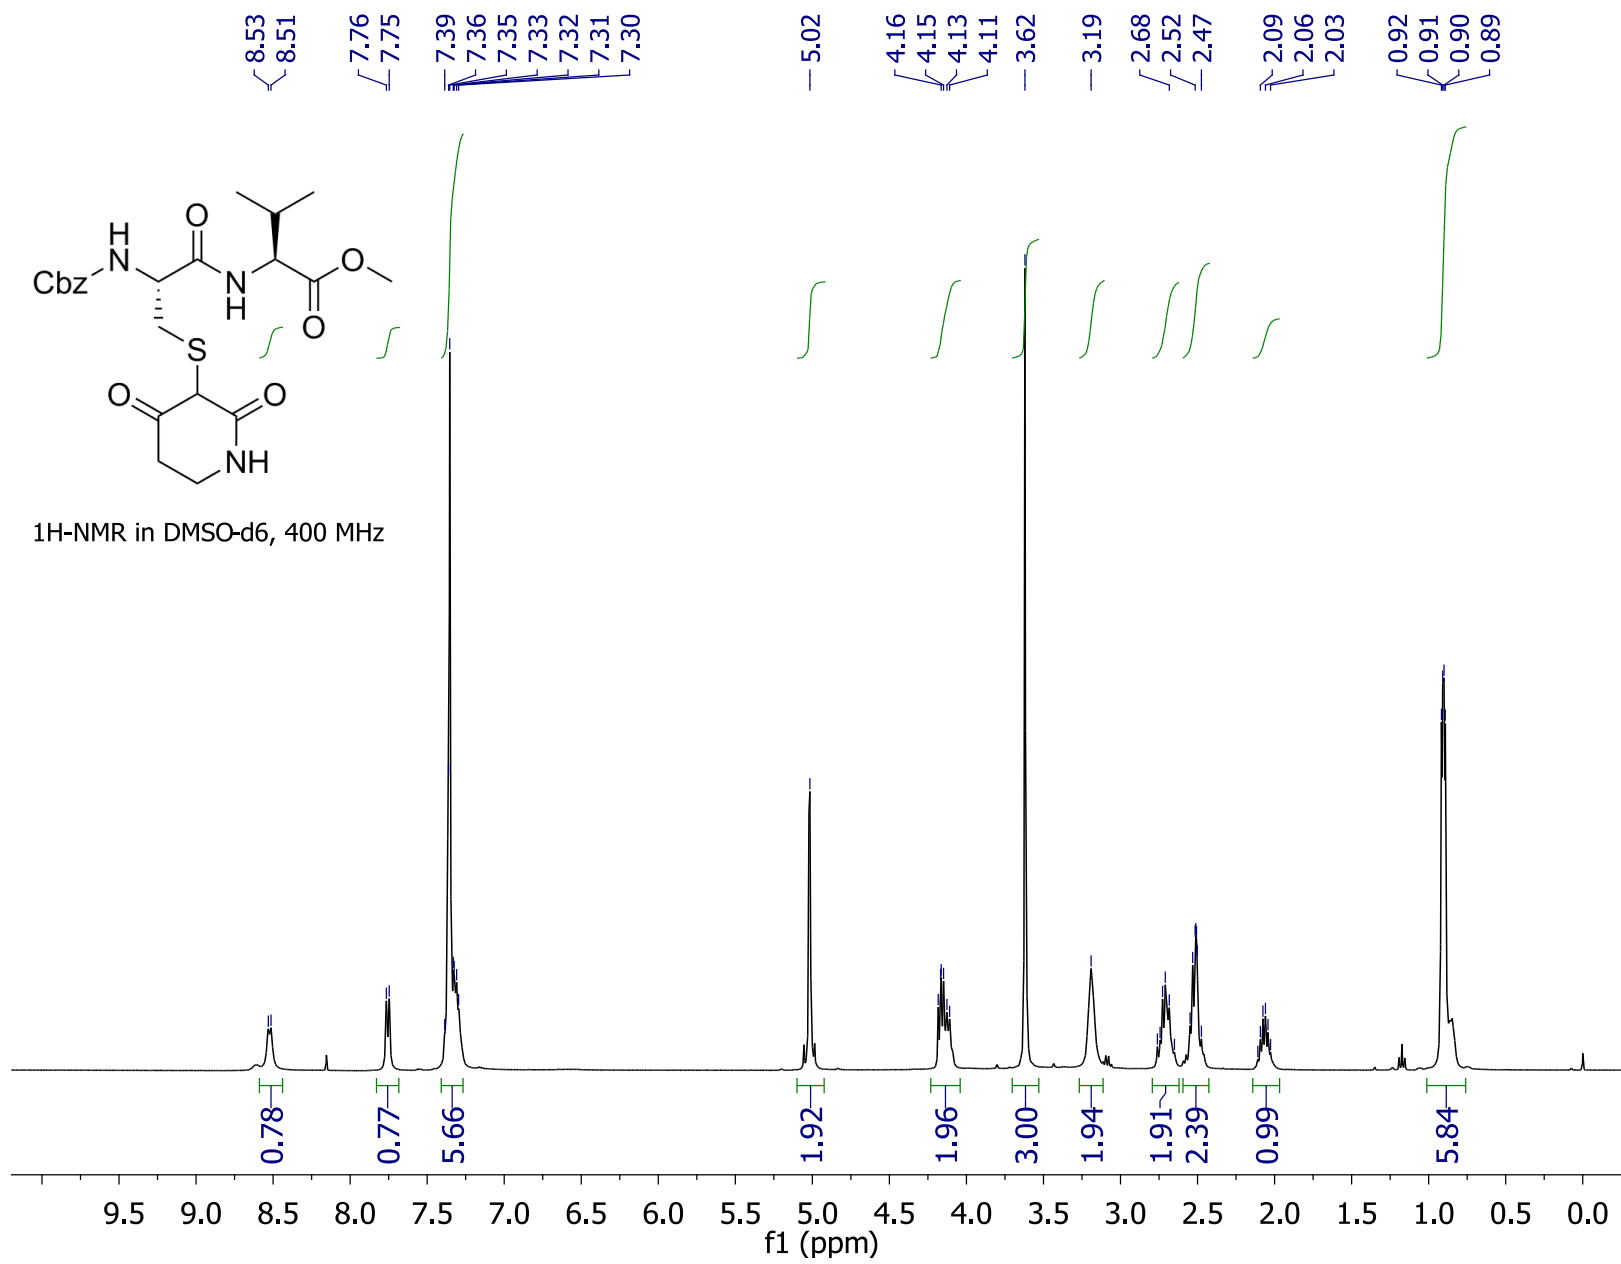

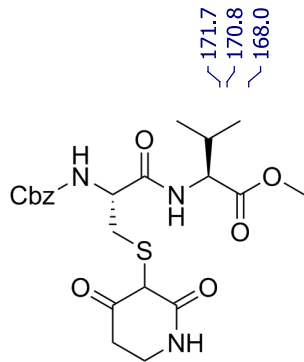

in DMSO- $d_6$ , 100 MHz

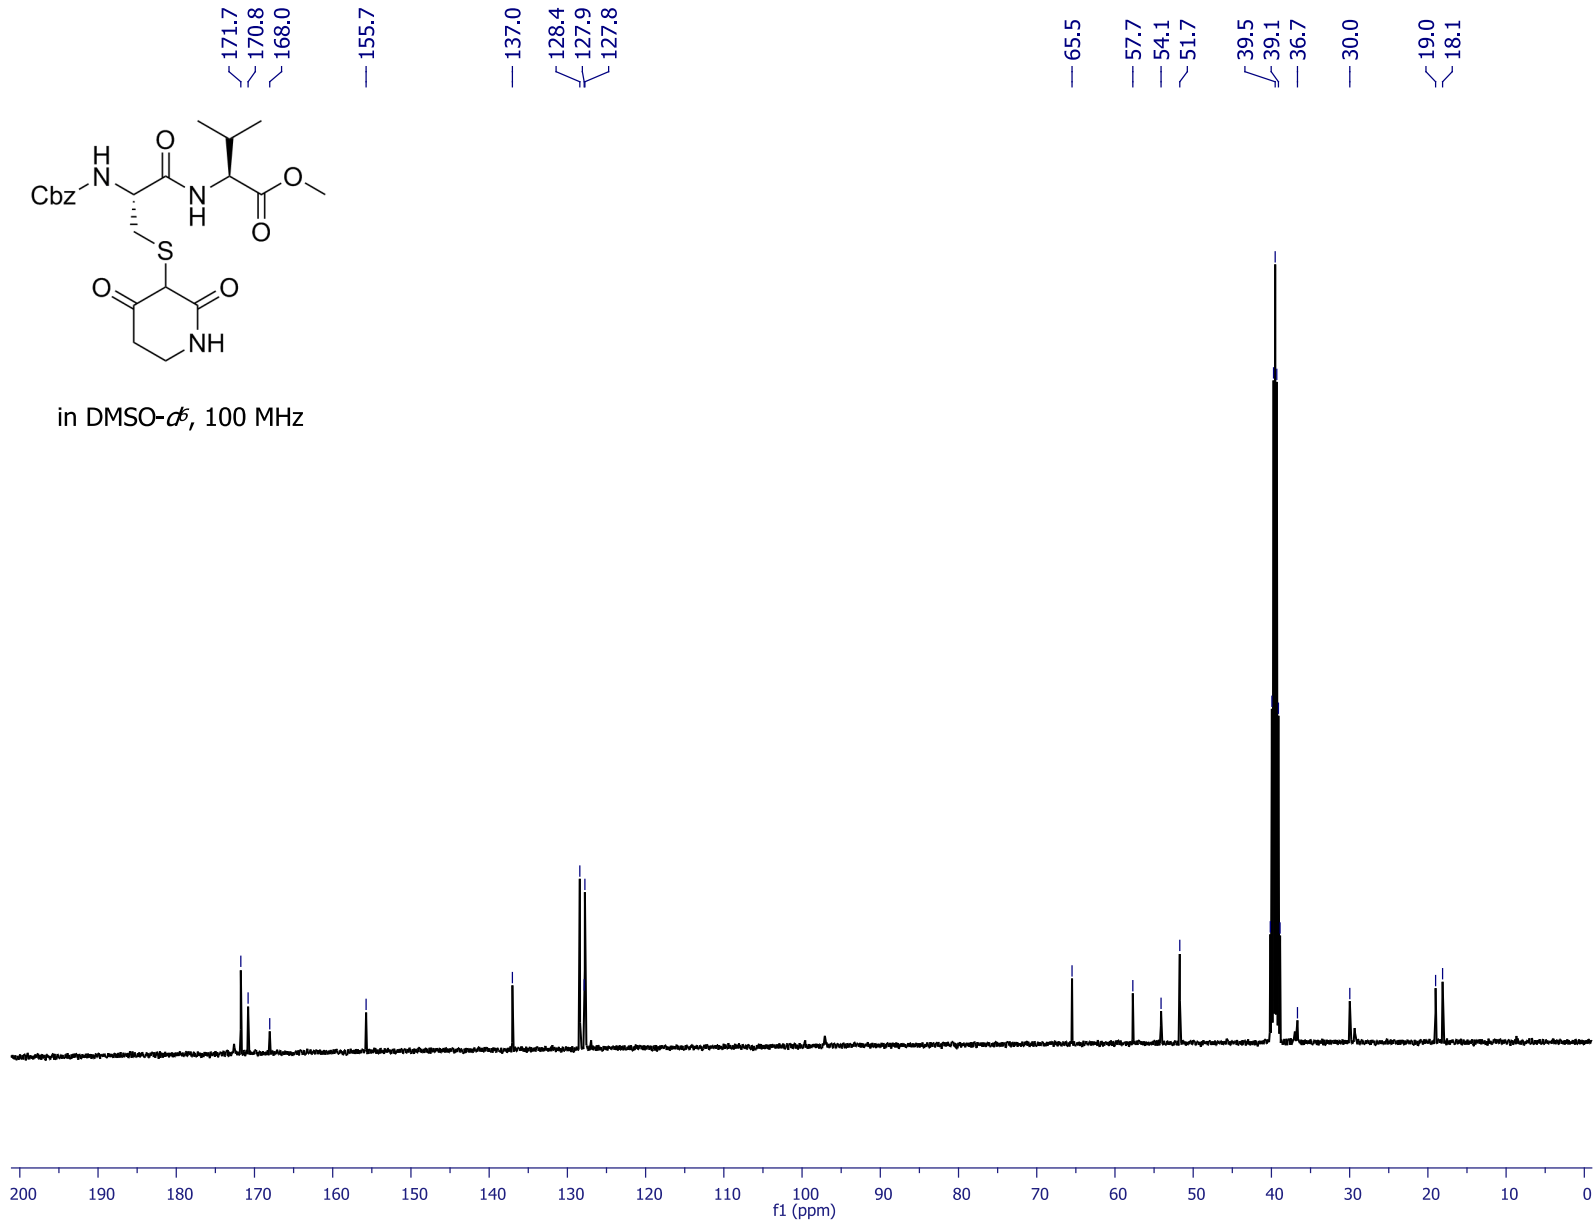

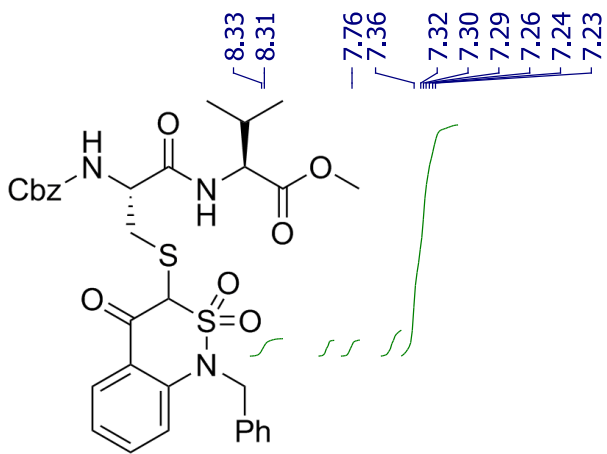

1H-NMR in DMSO-d<sub>6</sub>, 400 MHz

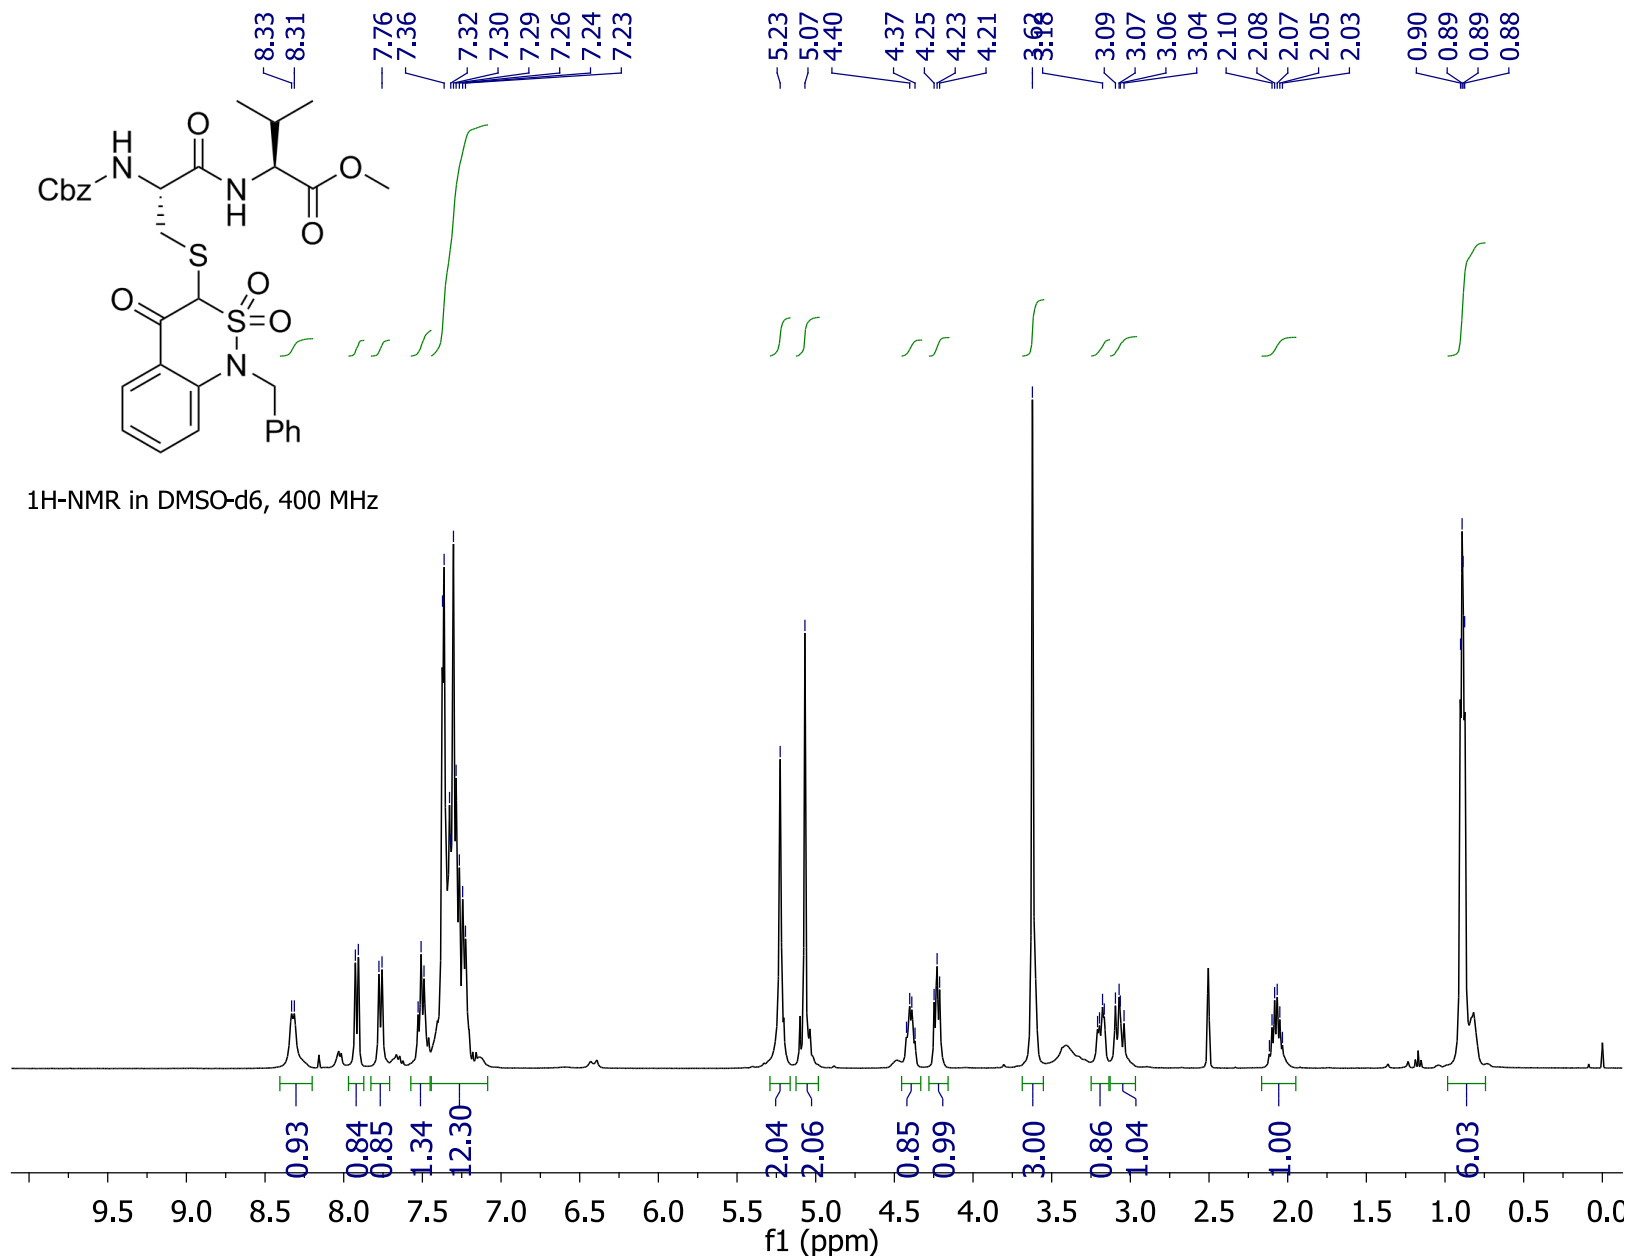

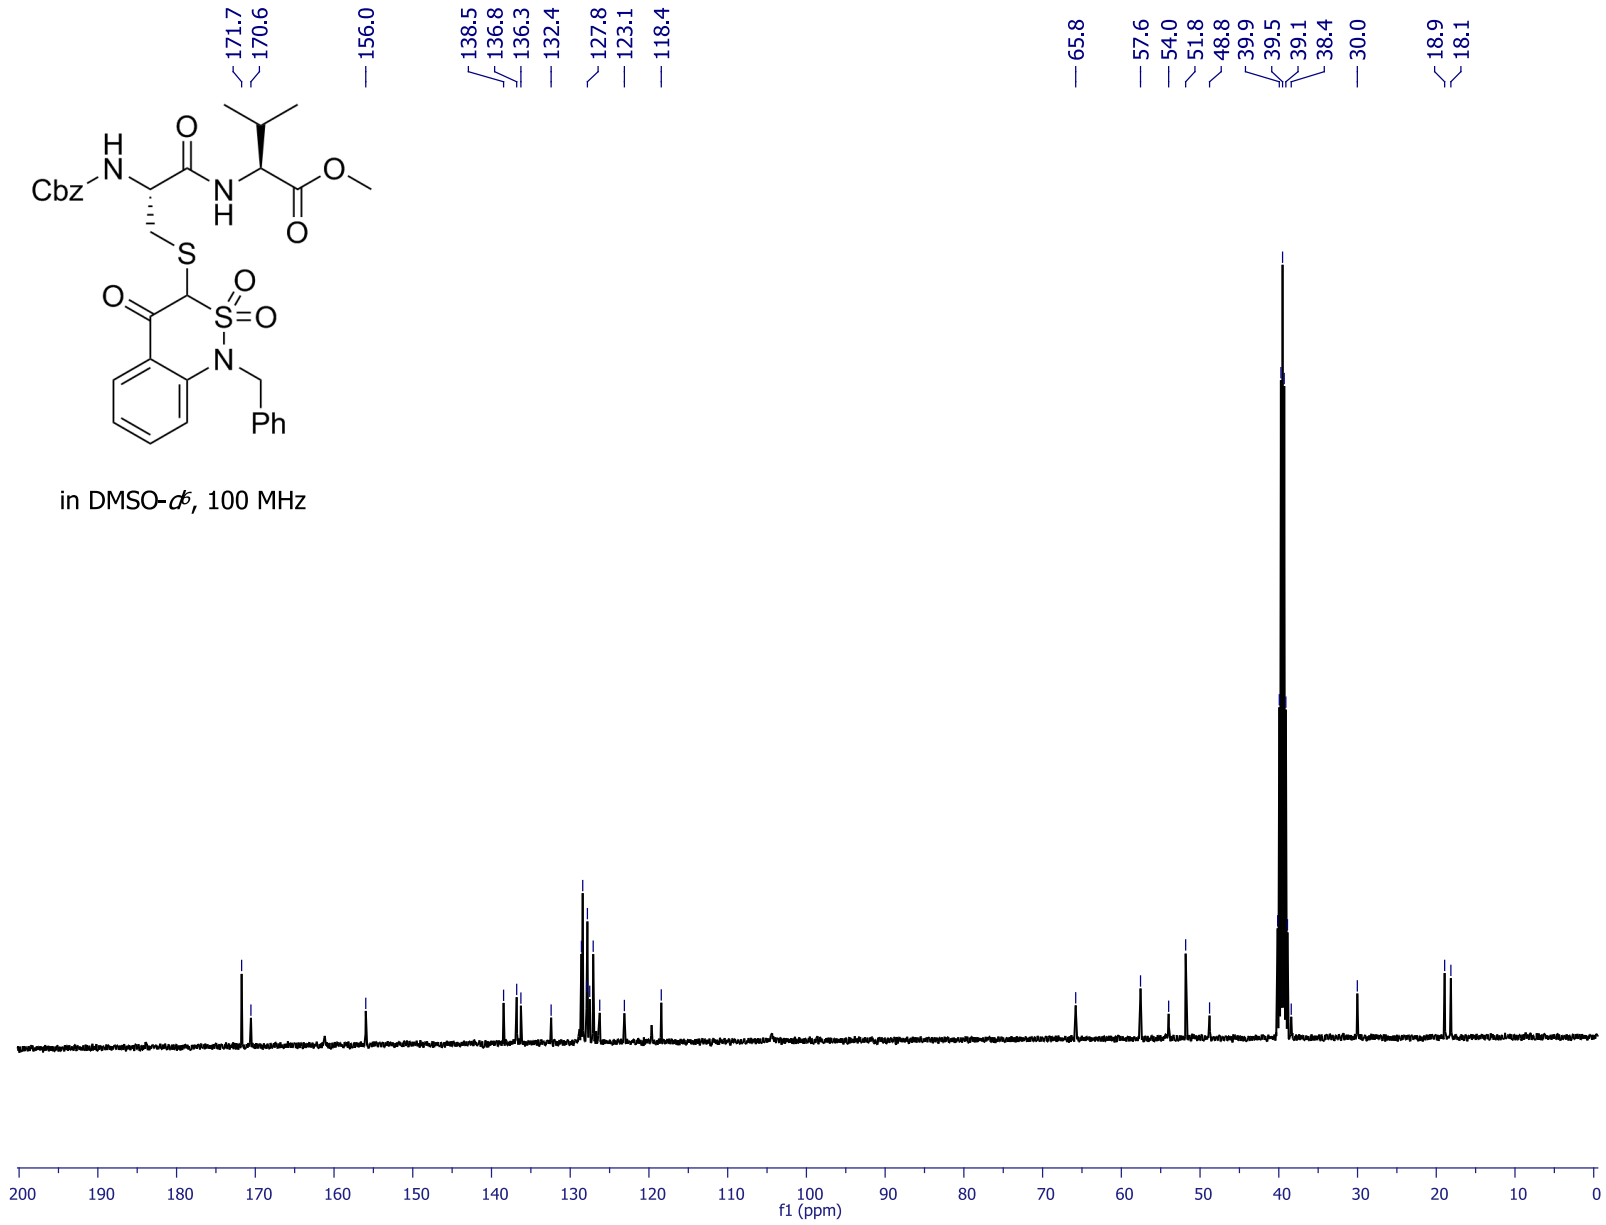

Supplement: SC-007-C5SC02569A-s001.pdf [file SC-007-C5SC02569A-s001.pdf]
